# Supplementary material
Source: PubMed Central journal article supplement (PMC5241238)
Supplement: NIHMS817411-supplement-01.pdf [file NIHMS817411-supplement-01.pdf]

# Supplementary Material

## The SAMPL5 Host-Guest Challenge:

### Computing Binding Free Energies and Enthalpies from Explicit Solvent Simulations by the Attach-Pull-Release (APR) Method

Jian Yin, Niel M. Henriksen, David R. Slochower, and Michael K. Gilson\*

Skaggs School of Pharmacy and Pharmaceutical Sciences, University of California San Diego, La Jolla, California 92093-0736, United States

\*Contact: [mgilson@ucsd.edu](mailto:mgilson@ucsd.edu)

**A tutorial for the APR method will be available soon on the webpage of AMBER tutorials. Please check <http://ambermd.org/tutorials>**

To compute the flip percentage in each OAH and OAMe systems, we first abstracted 7500 frames evenly from 750 ns MD simulations, and then analyzed the motions of all four benzoic acid flaps by recording the values of four torsion angles (Figure S1 a). Only if one of the torsion angles was smaller than 140 degrees (Figure S1 c, d), that structure was counted as a flipped conformation. Usually a flipped conformation contains one flipped flap, but structures with two flipped flaps were also observed (Figure S1 b), although very rarely. The total number of the flipped conformations was then divided by the number of frames, 7500, to obtain the flip percentage (Table S1). The torsion angles were most frequently observed at ~ 270 degrees (Figure S1 f) and the flap with a 180-degree torsion angle is a “transition state” between the “up” and “down” conformation (Figure S1 e).

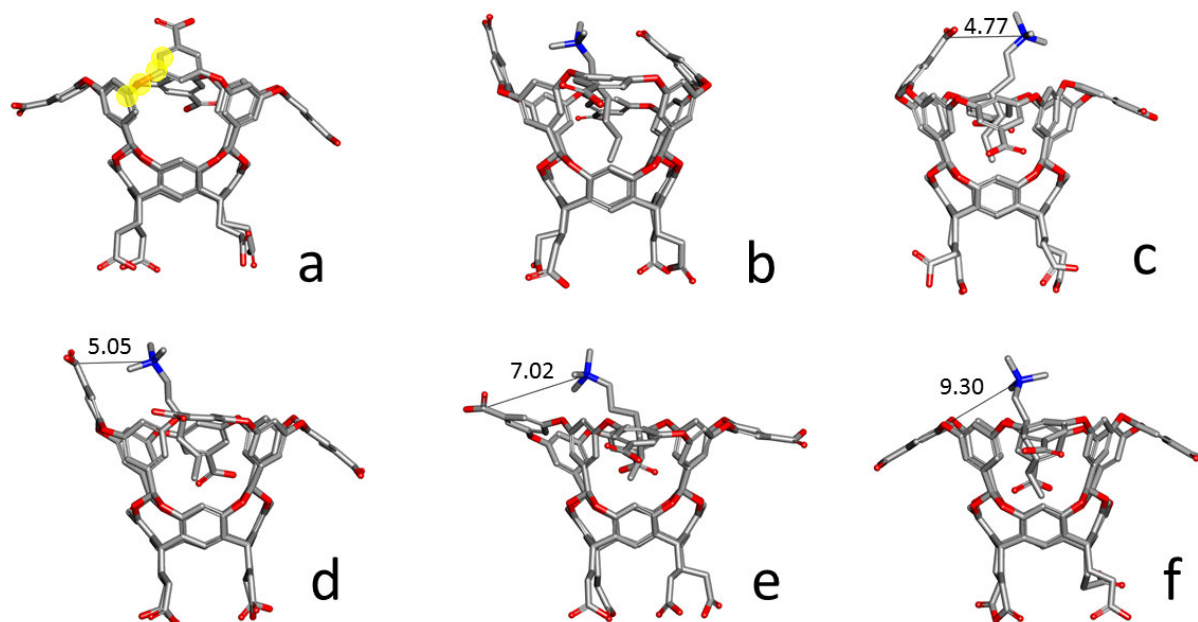

**Fig S1.** (a) One of the C-O-C-C torsion angles selected to monitor the motions of benzoic acid moiety highlighted in yellow; (b) A double flip-over conformation observed in the trajectories of OAH-G3. Two flaps are “up” simultaneously; Different conformations observed in the 750 ns trajectories of OAH-G3: The value of the C-O-C-C torsion angle on the left flap is (c) 60, (d) 140, (e) 180 and (f) 270 degrees. The distance (Å) between the carbon atom in the carboxyl group on the left flap and nitrogen atom in the amine group is labeled in conformation c-f.

**Table S1.** The flip-over percentage of bound and unbound hosts.

|           | OAH (%) | OAMe (%) |
|-----------|---------|----------|
| free host | 0.28    | 0.00     |
| G1        | 1.17    | 0.00     |
| G2        | 0.89    | 0.00     |
| G3        | 10.15   | 0.00     |
| G4        | 0.00    | 0.00     |
| G5        | 10.15   | 0.00     |
| G6        | 3.01    | 0.00     |

**Representative binding poses obtained via clustering over 750 ns of MD simulations using TIP3P water model (in PDB format)**

**OAH-G1**

|      |    |     |     |   |   |        |        |        |      |      |   |
|------|----|-----|-----|---|---|--------|--------|--------|------|------|---|
| ATOM | 1  | C1  | OCT | X | 4 | 20.493 | 22.799 | 29.719 | 1.00 | 0.00 | C |
| ATOM | 2  | C2  | OCT | X | 4 | 22.647 | 21.613 | 30.976 | 1.00 | 0.00 | C |
| ATOM | 3  | C3  | OCT | X | 4 | 21.191 | 21.706 | 29.113 | 1.00 | 0.00 | C |
| ATOM | 4  | C4  | OCT | X | 4 | 20.996 | 23.260 | 30.899 | 1.00 | 0.00 | C |
| ATOM | 5  | C5  | OCT | X | 4 | 22.075 | 22.746 | 31.515 | 1.00 | 0.00 | C |
| ATOM | 6  | C6  | OCT | X | 4 | 22.242 | 21.082 | 29.753 | 1.00 | 0.00 | C |
| ATOM | 7  | O1  | OCT | X | 4 | 23.563 | 20.964 | 31.840 | 1.00 | 0.00 | O |
| ATOM | 8  | C7  | OCT | X | 4 | 22.937 | 19.837 | 29.225 | 1.00 | 0.00 | C |
| ATOM | 9  | C8  | OCT | X | 4 | 23.150 | 19.695 | 32.463 | 1.00 | 0.00 | C |
| ATOM | 10 | O2  | OCT | X | 4 | 23.638 | 18.604 | 31.709 | 1.00 | 0.00 | O |
| ATOM | 11 | C9  | OCT | X | 4 | 22.738 | 17.939 | 30.933 | 1.00 | 0.00 | C |
| ATOM | 12 | C10 | OCT | X | 4 | 22.274 | 18.480 | 29.699 | 1.00 | 0.00 | C |
| ATOM | 13 | C11 | OCT | X | 4 | 21.270 | 17.822 | 28.888 | 1.00 | 0.00 | C |
| ATOM | 14 | C12 | OCT | X | 4 | 22.209 | 16.720 | 31.305 | 1.00 | 0.00 | C |
| ATOM | 15 | C13 | OCT | X | 4 | 20.674 | 16.697 | 29.422 | 1.00 | 0.00 | C |
| ATOM | 16 | C14 | OCT | X | 4 | 21.155 | 16.176 | 30.652 | 1.00 | 0.00 | C |
| ATOM | 17 | O3  | OCT | X | 4 | 20.459 | 15.137 | 31.268 | 1.00 | 0.00 | O |
| ATOM | 18 | C15 | OCT | X | 4 | 19.388 | 16.170 | 28.722 | 1.00 | 0.00 | C |
| ATOM | 19 | C16 | OCT | X | 4 | 18.073 | 16.669 | 29.302 | 1.00 | 0.00 | C |
| ATOM | 20 | C17 | OCT | X | 4 | 17.543 | 16.070 | 30.408 | 1.00 | 0.00 | C |
| ATOM | 21 | C18 | OCT | X | 4 | 19.212 | 15.334 | 31.965 | 1.00 | 0.00 | C |
| ATOM | 22 | O4  | OCT | X | 4 | 18.175 | 14.994 | 31.017 | 1.00 | 0.00 | O |
| ATOM | 23 | O5  | OCT | X | 4 | 20.259 | 24.272 | 31.600 | 1.00 | 0.00 | O |
| ATOM | 24 | C19 | OCT | X | 4 | 19.164 | 23.353 | 29.071 | 1.00 | 0.00 | C |
| ATOM | 25 | C20 | OCT | X | 4 | 17.948 | 22.647 | 29.625 | 1.00 | 0.00 | C |
| ATOM | 26 | O6  | OCT | X | 4 | 17.831 | 24.079 | 31.589 | 1.00 | 0.00 | O |
| ATOM | 27 | C21 | OCT | X | 4 | 17.366 | 23.114 | 30.810 | 1.00 | 0.00 | C |
| ATOM | 28 | C22 | OCT | X | 4 | 16.413 | 16.577 | 31.058 | 1.00 | 0.00 | C |
| ATOM | 29 | C23 | OCT | X | 4 | 15.807 | 17.650 | 30.499 | 1.00 | 0.00 | C |
| ATOM | 30 | C24 | OCT | X | 4 | 16.274 | 22.443 | 31.399 | 1.00 | 0.00 | C |
| ATOM | 31 | C25 | OCT | X | 4 | 15.759 | 21.279 | 30.772 | 1.00 | 0.00 | C |
| ATOM | 32 | O7  | OCT | X | 4 | 14.803 | 18.115 | 31.254 | 1.00 | 0.00 | O |
| ATOM | 33 | O8  | OCT | X | 4 | 14.731 | 20.509 | 31.450 | 1.00 | 0.00 | O |
| ATOM | 34 | C26 | OCT | X | 4 | 15.037 | 19.267 | 32.148 | 1.00 | 0.00 | C |
| ATOM | 35 | C27 | OCT | X | 4 | 17.428 | 21.473 | 29.040 | 1.00 | 0.00 | C |
| ATOM | 36 | C28 | OCT | X | 4 | 16.346 | 20.778 | 29.584 | 1.00 | 0.00 | C |
| ATOM | 37 | C29 | OCT | X | 4 | 17.378 | 17.719 | 28.760 | 1.00 | 0.00 | C |
| ATOM | 38 | C30 | OCT | X | 4 | 15.707 | 19.598 | 28.854 | 1.00 | 0.00 | C |
| ATOM | 39 | C31 | OCT | X | 4 | 16.265 | 18.279 | 29.294 | 1.00 | 0.00 | C |
| ATOM | 40 | C32 | OCT | X | 4 | 19.016 | 23.834 | 32.396 | 1.00 | 0.00 | C |
| ATOM | 41 | C33 | OCT | X | 4 | 19.414 | 16.284 | 27.166 | 1.00 | 0.00 | C |
| ATOM | 42 | C34 | OCT | X | 4 | 20.318 | 15.177 | 26.642 | 1.00 | 0.00 | C |
| ATOM | 43 | C35 | OCT | X | 4 | 20.703 | 15.359 | 25.156 | 1.00 | 0.00 | C |
| ATOM | 44 | O9  | OCT | X | 4 | 21.849 | 15.440 | 24.817 | 1.00 | 0.00 | O |
| ATOM | 45 | C36 | OCT | X | 4 | 23.226 | 19.815 | 27.656 | 1.00 | 0.00 | C |
| ATOM | 46 | C37 | OCT | X | 4 | 24.439 | 18.907 | 27.405 | 1.00 | 0.00 | C |
| ATOM | 47 | C38 | OCT | X | 4 | 24.975 | 19.158 | 26.065 | 1.00 | 0.00 | C |
| ATOM | 48 | O10 | OCT | X | 4 | 25.903 | 19.918 | 25.938 | 1.00 | 0.00 | O |
| ATOM | 49 | C39 | OCT | X | 4 | 19.199 | 23.393 | 27.549 | 1.00 | 0.00 | C |
| ATOM | 50 | C40 | OCT | X | 4 | 19.915 | 24.633 | 27.058 | 1.00 | 0.00 | C |
| ATOM | 51 | C41 | OCT | X | 4 | 19.673 | 24.631 | 25.558 | 1.00 | 0.00 | C |
| ATOM | 52 | O11 | OCT | X | 4 | 20.334 | 23.950 | 24.817 | 1.00 | 0.00 | O |
| ATOM | 53 | C42 | OCT | X | 4 | 15.738 | 19.791 | 27.351 | 1.00 | 0.00 | C |
| ATOM | 54 | C43 | OCT | X | 4 | 14.759 | 18.832 | 26.712 | 1.00 | 0.00 | C |
| ATOM | 55 | C44 | OCT | X | 4 | 14.552 | 19.174 | 25.230 | 1.00 | 0.00 | C |

|      |     |     |     |   |   |        |        |        |      |      |   |
|------|-----|-----|-----|---|---|--------|--------|--------|------|------|---|
| ATOM | 56  | O12 | OCT | X | 4 | 13.641 | 18.614 | 24.579 | 1.00 | 0.00 | O |
| ATOM | 57  | C45 | OCT | X | 4 | 23.560 | 19.530 | 33.885 | 1.00 | 0.00 | C |
| ATOM | 58  | C46 | OCT | X | 4 | 24.309 | 19.267 | 36.617 | 1.00 | 0.00 | C |
| ATOM | 59  | C47 | OCT | X | 4 | 23.755 | 18.253 | 34.517 | 1.00 | 0.00 | C |
| ATOM | 60  | C48 | OCT | X | 4 | 23.606 | 20.636 | 34.745 | 1.00 | 0.00 | C |
| ATOM | 61  | C49 | OCT | X | 4 | 23.894 | 20.506 | 36.089 | 1.00 | 0.00 | C |
| ATOM | 62  | C50 | OCT | X | 4 | 24.194 | 18.125 | 35.807 | 1.00 | 0.00 | C |
| ATOM | 63  | C51 | OCT | X | 4 | 18.952 | 24.286 | 33.911 | 1.00 | 0.00 | C |
| ATOM | 64  | C52 | OCT | X | 4 | 18.848 | 24.757 | 36.703 | 1.00 | 0.00 | C |
| ATOM | 65  | C53 | OCT | X | 4 | 17.773 | 24.216 | 34.636 | 1.00 | 0.00 | C |
| ATOM | 66  | C54 | OCT | X | 4 | 20.102 | 24.561 | 34.577 | 1.00 | 0.00 | C |
| ATOM | 67  | C55 | OCT | X | 4 | 20.058 | 24.875 | 35.987 | 1.00 | 0.00 | C |
| ATOM | 68  | C56 | OCT | X | 4 | 17.669 | 24.491 | 36.057 | 1.00 | 0.00 | C |
| ATOM | 69  | C57 | OCT | X | 4 | 14.268 | 19.233 | 33.501 | 1.00 | 0.00 | C |
| ATOM | 70  | C58 | OCT | X | 4 | 12.997 | 18.993 | 36.004 | 1.00 | 0.00 | C |
| ATOM | 71  | C59 | OCT | X | 4 | 14.190 | 18.001 | 34.141 | 1.00 | 0.00 | C |
| ATOM | 72  | C60 | OCT | X | 4 | 13.827 | 20.400 | 34.132 | 1.00 | 0.00 | C |
| ATOM | 73  | C61 | OCT | X | 4 | 13.201 | 20.289 | 35.382 | 1.00 | 0.00 | C |
| ATOM | 74  | C62 | OCT | X | 4 | 13.495 | 17.884 | 35.369 | 1.00 | 0.00 | C |
| ATOM | 75  | C63 | OCT | X | 4 | 19.154 | 14.461 | 33.220 | 1.00 | 0.00 | C |
| ATOM | 76  | C64 | OCT | X | 4 | 19.025 | 13.036 | 35.663 | 1.00 | 0.00 | C |
| ATOM | 77  | C65 | OCT | X | 4 | 17.909 | 14.263 | 33.836 | 1.00 | 0.00 | C |
| ATOM | 78  | C66 | OCT | X | 4 | 20.312 | 14.167 | 33.959 | 1.00 | 0.00 | C |
| ATOM | 79  | C67 | OCT | X | 4 | 20.234 | 13.531 | 35.210 | 1.00 | 0.00 | C |
| ATOM | 80  | C68 | OCT | X | 4 | 17.814 | 13.406 | 35.052 | 1.00 | 0.00 | C |
| ATOM | 81  | O13 | OCT | X | 4 | 21.100 | 25.411 | 36.697 | 1.00 | 0.00 | O |
| ATOM | 82  | O14 | OCT | X | 4 | 12.805 | 21.478 | 36.009 | 1.00 | 0.00 | O |
| ATOM | 83  | O15 | OCT | X | 4 | 13.359 | 16.618 | 36.006 | 1.00 | 0.00 | O |
| ATOM | 84  | O16 | OCT | X | 4 | 23.929 | 21.596 | 36.987 | 1.00 | 0.00 | O |
| ATOM | 85  | O17 | OCT | X | 4 | 24.368 | 16.966 | 36.441 | 1.00 | 0.00 | O |
| ATOM | 86  | O18 | OCT | X | 4 | 16.681 | 13.215 | 35.747 | 1.00 | 0.00 | O |
| ATOM | 87  | O19 | OCT | X | 4 | 21.435 | 13.333 | 35.910 | 1.00 | 0.00 | O |
| ATOM | 88  | C69 | OCT | X | 4 | 13.430 | 22.709 | 35.794 | 1.00 | 0.00 | C |
| ATOM | 89  | C70 | OCT | X | 4 | 14.598 | 25.192 | 35.331 | 1.00 | 0.00 | C |
| ATOM | 90  | C71 | OCT | X | 4 | 14.671 | 22.985 | 36.350 | 1.00 | 0.00 | C |
| ATOM | 91  | C72 | OCT | X | 4 | 12.827 | 23.588 | 34.886 | 1.00 | 0.00 | C |
| ATOM | 92  | C73 | OCT | X | 4 | 13.340 | 24.884 | 34.738 | 1.00 | 0.00 | C |
| ATOM | 93  | C74 | OCT | X | 4 | 15.218 | 24.188 | 36.085 | 1.00 | 0.00 | C |
| ATOM | 94  | O20 | OCT | X | 4 | 16.469 | 24.447 | 36.660 | 1.00 | 0.00 | O |
| ATOM | 95  | C75 | OCT | X | 4 | 23.711 | 22.917 | 36.570 | 1.00 | 0.00 | C |
| ATOM | 96  | C76 | OCT | X | 4 | 23.364 | 25.582 | 35.981 | 1.00 | 0.00 | C |
| ATOM | 97  | C77 | OCT | X | 4 | 24.713 | 23.618 | 35.910 | 1.00 | 0.00 | C |
| ATOM | 98  | C78 | OCT | X | 4 | 22.485 | 23.533 | 36.880 | 1.00 | 0.00 | C |
| ATOM | 99  | C79 | OCT | X | 4 | 22.346 | 24.873 | 36.539 | 1.00 | 0.00 | C |
| ATOM | 100 | C80 | OCT | X | 4 | 24.599 | 24.937 | 35.639 | 1.00 | 0.00 | C |
| ATOM | 101 | C81 | OCT | X | 4 | 13.819 | 15.431 | 35.504 | 1.00 | 0.00 | C |
| ATOM | 102 | C82 | OCT | X | 4 | 14.762 | 13.059 | 34.503 | 1.00 | 0.00 | C |
| ATOM | 103 | C83 | OCT | X | 4 | 13.070 | 14.719 | 34.534 | 1.00 | 0.00 | C |
| ATOM | 104 | C84 | OCT | X | 4 | 15.047 | 15.005 | 35.906 | 1.00 | 0.00 | C |
| ATOM | 105 | C85 | OCT | X | 4 | 15.509 | 13.756 | 35.443 | 1.00 | 0.00 | C |
| ATOM | 106 | C86 | OCT | X | 4 | 13.513 | 13.447 | 34.069 | 1.00 | 0.00 | C |
| ATOM | 107 | C87 | OCT | X | 4 | 12.727 | 12.601 | 33.155 | 1.00 | 0.00 | C |
| ATOM | 108 | O21 | OCT | X | 4 | 11.903 | 13.071 | 32.382 | 1.00 | 0.00 | O |
| ATOM | 109 | C88 | OCT | X | 4 | 25.999 | 12.915 | 34.253 | 1.00 | 0.00 | C |
| ATOM | 110 | O22 | OCT | X | 4 | 27.072 | 13.420 | 34.046 | 1.00 | 0.00 | O |
| ATOM | 111 | C89 | OCT | X | 4 | 25.728 | 25.693 | 34.979 | 1.00 | 0.00 | C |
| ATOM | 112 | O23 | OCT | X | 4 | 26.853 | 25.279 | 34.972 | 1.00 | 0.00 | O |
| ATOM | 113 | O24 | OCT | X | 4 | 19.842 | 15.009 | 24.338 | 1.00 | 0.00 | O |
| ATOM | 114 | O25 | OCT | X | 4 | 15.289 | 19.944 | 24.617 | 1.00 | 0.00 | O |
| ATOM | 115 | O26 | OCT | X | 4 | 18.663 | 25.240 | 25.091 | 1.00 | 0.00 | O |

|      |     |     |     |   |   |        |        |        |      |      |   |
|------|-----|-----|-----|---|---|--------|--------|--------|------|------|---|
| ATOM | 116 | C90 | OCT | X | 4 | 12.656 | 25.870 | 33.822 | 1.00 | 0.00 | C |
| ATOM | 117 | O27 | OCT | X | 4 | 13.101 | 26.977 | 33.736 | 1.00 | 0.00 | O |
| ATOM | 118 | O28 | OCT | X | 4 | 25.750 | 11.768 | 34.030 | 1.00 | 0.00 | O |
| ATOM | 119 | O29 | OCT | X | 4 | 12.884 | 11.383 | 33.180 | 1.00 | 0.00 | O |
| ATOM | 120 | O30 | OCT | X | 4 | 11.783 | 25.538 | 33.081 | 1.00 | 0.00 | O |
| ATOM | 121 | O31 | OCT | X | 4 | 25.505 | 26.817 | 34.546 | 1.00 | 0.00 | O |
| ATOM | 122 | O32 | OCT | X | 4 | 24.712 | 18.426 | 25.076 | 1.00 | 0.00 | O |
| ATOM | 123 | C91 | OCT | X | 4 | 24.128 | 15.729 | 35.889 | 1.00 | 0.00 | C |
| ATOM | 124 | C92 | OCT | X | 4 | 23.645 | 13.204 | 34.963 | 1.00 | 0.00 | C |
| ATOM | 125 | C93 | OCT | X | 4 | 22.890 | 15.202 | 36.038 | 1.00 | 0.00 | C |
| ATOM | 126 | C94 | OCT | X | 4 | 25.182 | 15.068 | 35.272 | 1.00 | 0.00 | C |
| ATOM | 127 | C95 | OCT | X | 4 | 24.992 | 13.766 | 34.884 | 1.00 | 0.00 | C |
| ATOM | 128 | C96 | OCT | X | 4 | 22.642 | 13.914 | 35.580 | 1.00 | 0.00 | C |
| ATOM | 129 | H1  | OCT | X | 4 | 20.710 | 21.203 | 28.278 | 1.00 | 0.00 | H |
| ATOM | 130 | H2  | OCT | X | 4 | 22.346 | 23.004 | 32.535 | 1.00 | 0.00 | H |
| ATOM | 131 | H3  | OCT | X | 4 | 23.937 | 19.847 | 29.664 | 1.00 | 0.00 | H |
| ATOM | 132 | H4  | OCT | X | 4 | 22.062 | 19.617 | 32.323 | 1.00 | 0.00 | H |
| ATOM | 133 | H5  | OCT | X | 4 | 20.806 | 18.376 | 28.076 | 1.00 | 0.00 | H |
| ATOM | 134 | H6  | OCT | X | 4 | 22.510 | 16.203 | 32.212 | 1.00 | 0.00 | H |
| ATOM | 135 | H7  | OCT | X | 4 | 19.420 | 15.083 | 28.824 | 1.00 | 0.00 | H |
| ATOM | 136 | H8  | OCT | X | 4 | 19.194 | 16.380 | 32.305 | 1.00 | 0.00 | H |
| ATOM | 137 | H9  | OCT | X | 4 | 18.937 | 24.377 | 29.375 | 1.00 | 0.00 | H |
| ATOM | 138 | H10 | OCT | X | 4 | 15.990 | 16.092 | 31.934 | 1.00 | 0.00 | H |
| ATOM | 139 | H11 | OCT | X | 4 | 15.717 | 22.888 | 32.219 | 1.00 | 0.00 | H |
| ATOM | 140 | H12 | OCT | X | 4 | 16.084 | 19.311 | 32.485 | 1.00 | 0.00 | H |
| ATOM | 141 | H13 | OCT | X | 4 | 17.948 | 21.093 | 28.164 | 1.00 | 0.00 | H |
| ATOM | 142 | H14 | OCT | X | 4 | 17.751 | 18.099 | 27.812 | 1.00 | 0.00 | H |
| ATOM | 143 | H15 | OCT | X | 4 | 14.635 | 19.649 | 29.054 | 1.00 | 0.00 | H |
| ATOM | 144 | H16 | OCT | X | 4 | 19.166 | 22.749 | 32.500 | 1.00 | 0.00 | H |
| ATOM | 145 | H17 | OCT | X | 4 | 18.455 | 16.115 | 26.672 | 1.00 | 0.00 | H |
| ATOM | 146 | H18 | OCT | X | 4 | 19.890 | 17.186 | 26.776 | 1.00 | 0.00 | H |
| ATOM | 147 | H19 | OCT | X | 4 | 21.237 | 15.042 | 27.216 | 1.00 | 0.00 | H |
| ATOM | 148 | H20 | OCT | X | 4 | 19.930 | 14.168 | 26.798 | 1.00 | 0.00 | H |
| ATOM | 149 | H21 | OCT | X | 4 | 23.395 | 20.866 | 27.411 | 1.00 | 0.00 | H |
| ATOM | 150 | H22 | OCT | X | 4 | 22.372 | 19.506 | 27.051 | 1.00 | 0.00 | H |
| ATOM | 151 | H23 | OCT | X | 4 | 25.284 | 19.045 | 28.083 | 1.00 | 0.00 | H |
| ATOM | 152 | H24 | OCT | X | 4 | 24.032 | 17.909 | 27.580 | 1.00 | 0.00 | H |
| ATOM | 153 | H25 | OCT | X | 4 | 19.355 | 22.437 | 27.043 | 1.00 | 0.00 | H |
| ATOM | 154 | H26 | OCT | X | 4 | 18.142 | 23.611 | 27.382 | 1.00 | 0.00 | H |
| ATOM | 155 | H27 | OCT | X | 4 | 19.494 | 25.599 | 27.345 | 1.00 | 0.00 | H |
| ATOM | 156 | H28 | OCT | X | 4 | 20.973 | 24.545 | 27.314 | 1.00 | 0.00 | H |
| ATOM | 157 | H29 | OCT | X | 4 | 15.438 | 20.829 | 27.195 | 1.00 | 0.00 | H |
| ATOM | 158 | H30 | OCT | X | 4 | 16.715 | 19.661 | 26.881 | 1.00 | 0.00 | H |
| ATOM | 159 | H31 | OCT | X | 4 | 15.039 | 17.781 | 26.817 | 1.00 | 0.00 | H |
| ATOM | 160 | H32 | OCT | X | 4 | 13.762 | 19.005 | 27.123 | 1.00 | 0.00 | H |
| ATOM | 161 | H33 | OCT | X | 4 | 24.645 | 19.137 | 37.643 | 1.00 | 0.00 | H |
| ATOM | 162 | H34 | OCT | X | 4 | 23.632 | 17.402 | 33.853 | 1.00 | 0.00 | H |
| ATOM | 163 | H35 | OCT | X | 4 | 23.341 | 21.643 | 34.433 | 1.00 | 0.00 | H |
| ATOM | 164 | H36 | OCT | X | 4 | 18.859 | 24.773 | 37.790 | 1.00 | 0.00 | H |
| ATOM | 165 | H37 | OCT | X | 4 | 16.867 | 23.964 | 34.092 | 1.00 | 0.00 | H |
| ATOM | 166 | H38 | OCT | X | 4 | 21.007 | 24.676 | 33.987 | 1.00 | 0.00 | H |
| ATOM | 167 | H39 | OCT | X | 4 | 12.413 | 18.888 | 36.914 | 1.00 | 0.00 | H |
| ATOM | 168 | H40 | OCT | X | 4 | 14.591 | 17.099 | 33.686 | 1.00 | 0.00 | H |
| ATOM | 169 | H41 | OCT | X | 4 | 13.962 | 21.354 | 33.628 | 1.00 | 0.00 | H |
| ATOM | 170 | H42 | OCT | X | 4 | 18.979 | 12.388 | 36.535 | 1.00 | 0.00 | H |
| ATOM | 171 | H43 | OCT | X | 4 | 17.011 | 14.589 | 33.319 | 1.00 | 0.00 | H |
| ATOM | 172 | H44 | OCT | X | 4 | 21.277 | 14.526 | 33.609 | 1.00 | 0.00 | H |
| ATOM | 173 | H45 | OCT | X | 4 | 15.060 | 26.175 | 35.289 | 1.00 | 0.00 | H |
| ATOM | 174 | H46 | OCT | X | 4 | 15.252 | 22.364 | 37.027 | 1.00 | 0.00 | H |
| ATOM | 175 | H47 | OCT | X | 4 | 11.911 | 23.328 | 34.360 | 1.00 | 0.00 | H |

|      |     |     |     |   |   |        |        |        |      |      |   |
|------|-----|-----|-----|---|---|--------|--------|--------|------|------|---|
| ATOM | 176 | H48 | OCT | X | 4 | 23.202 | 26.643 | 35.806 | 1.00 | 0.00 | H |
| ATOM | 177 | H49 | OCT | X | 4 | 25.615 | 23.124 | 35.559 | 1.00 | 0.00 | H |
| ATOM | 178 | H50 | OCT | X | 4 | 21.644 | 23.071 | 37.391 | 1.00 | 0.00 | H |
| ATOM | 179 | H51 | OCT | X | 4 | 15.312 | 12.167 | 34.212 | 1.00 | 0.00 | H |
| ATOM | 180 | H52 | OCT | X | 4 | 12.083 | 15.112 | 34.301 | 1.00 | 0.00 | H |
| ATOM | 181 | H53 | OCT | X | 4 | 15.716 | 15.575 | 36.545 | 1.00 | 0.00 | H |
| ATOM | 182 | H54 | OCT | X | 4 | 23.368 | 12.210 | 34.620 | 1.00 | 0.00 | H |
| ATOM | 183 | H55 | OCT | X | 4 | 22.094 | 15.768 | 36.515 | 1.00 | 0.00 | H |
| ATOM | 184 | H56 | OCT | X | 4 | 26.200 | 15.445 | 35.323 | 1.00 | 0.00 | H |
| ATOM | 185 | C1  | MOL | X | 5 | 19.081 | 19.148 | 31.967 | 1.00 | 0.00 | C |
| ATOM | 186 | C2  | MOL | X | 5 | 19.251 | 19.348 | 33.118 | 1.00 | 0.00 | C |
| ATOM | 187 | C3  | MOL | X | 5 | 19.373 | 19.409 | 34.553 | 1.00 | 0.00 | C |
| ATOM | 188 | C4  | MOL | X | 5 | 19.953 | 18.119 | 35.189 | 1.00 | 0.00 | C |
| ATOM | 189 | C5  | MOL | X | 5 | 20.313 | 18.517 | 36.643 | 1.00 | 0.00 | C |
| ATOM | 190 | C6  | MOL | X | 5 | 19.134 | 18.377 | 37.573 | 1.00 | 0.00 | C |
| ATOM | 191 | O1  | MOL | X | 5 | 18.405 | 19.396 | 37.585 | 1.00 | 0.00 | O |
| ATOM | 192 | O2  | MOL | X | 5 | 18.890 | 17.341 | 38.174 | 1.00 | 0.00 | O |
| ATOM | 193 | H1  | MOL | X | 5 | 18.999 | 18.966 | 30.920 | 1.00 | 0.00 | H |
| ATOM | 194 | H2  | MOL | X | 5 | 20.006 | 20.297 | 34.605 | 1.00 | 0.00 | H |
| ATOM | 195 | H3  | MOL | X | 5 | 18.444 | 19.677 | 35.061 | 1.00 | 0.00 | H |
| ATOM | 196 | H4  | MOL | X | 5 | 19.308 | 17.240 | 35.257 | 1.00 | 0.00 | H |
| ATOM | 197 | H5  | MOL | X | 5 | 20.857 | 17.855 | 34.637 | 1.00 | 0.00 | H |
| ATOM | 198 | H6  | MOL | X | 5 | 21.041 | 17.847 | 37.106 | 1.00 | 0.00 | H |
| ATOM | 199 | H7  | MOL | X | 5 | 20.779 | 19.492 | 36.796 | 1.00 | 0.00 | H |
| END  |     |     |     |   |   |        |        |        |      |      |   |

## OAH-G2

|      |    |     |     |   |   |        |        |        |      |      |   |
|------|----|-----|-----|---|---|--------|--------|--------|------|------|---|
| ATOM | 1  | C1  | OCB | X | 4 | 21.513 | 24.979 | 29.928 | 1.00 | 0.00 | C |
| ATOM | 2  | C2  | OCB | X | 4 | 23.845 | 24.168 | 31.247 | 1.00 | 0.00 | C |
| ATOM | 3  | C3  | OCB | X | 4 | 22.140 | 23.850 | 29.509 | 1.00 | 0.00 | C |
| ATOM | 4  | C4  | OCB | X | 4 | 22.023 | 25.737 | 30.986 | 1.00 | 0.00 | C |
| ATOM | 5  | C5  | OCB | X | 4 | 23.212 | 25.309 | 31.622 | 1.00 | 0.00 | C |
| ATOM | 6  | C6  | OCB | X | 4 | 23.305 | 23.395 | 30.178 | 1.00 | 0.00 | C |
| ATOM | 7  | O1  | OCB | X | 4 | 24.874 | 23.603 | 31.922 | 1.00 | 0.00 | O |
| ATOM | 8  | C7  | OCB | X | 4 | 23.983 | 22.089 | 29.692 | 1.00 | 0.00 | C |
| ATOM | 9  | C8  | OCB | X | 4 | 24.354 | 22.516 | 32.734 | 1.00 | 0.00 | C |
| ATOM | 10 | O2  | OCB | X | 4 | 24.804 | 21.234 | 32.345 | 1.00 | 0.00 | O |
| ATOM | 11 | C9  | OCB | X | 4 | 23.798 | 20.561 | 31.732 | 1.00 | 0.00 | C |
| ATOM | 12 | C10 | OCB | X | 4 | 23.343 | 20.916 | 30.439 | 1.00 | 0.00 | C |
| ATOM | 13 | C11 | OCB | X | 4 | 22.217 | 20.196 | 29.970 | 1.00 | 0.00 | C |
| ATOM | 14 | C12 | OCB | X | 4 | 23.194 | 19.532 | 32.401 | 1.00 | 0.00 | C |
| ATOM | 15 | C13 | OCB | X | 4 | 21.580 | 19.205 | 30.640 | 1.00 | 0.00 | C |
| ATOM | 16 | C14 | OCB | X | 4 | 22.064 | 18.925 | 31.944 | 1.00 | 0.00 | C |
| ATOM | 17 | O3  | OCB | X | 4 | 21.441 | 17.973 | 32.751 | 1.00 | 0.00 | O |
| ATOM | 18 | C15 | OCB | X | 4 | 20.342 | 18.469 | 30.131 | 1.00 | 0.00 | C |
| ATOM | 19 | C16 | OCB | X | 4 | 19.028 | 19.166 | 30.534 | 1.00 | 0.00 | C |
| ATOM | 20 | C17 | OCB | X | 4 | 18.500 | 18.929 | 31.781 | 1.00 | 0.00 | C |
| ATOM | 21 | C18 | OCB | X | 4 | 20.263 | 18.500 | 33.370 | 1.00 | 0.00 | C |
| ATOM | 22 | O4  | OCB | X | 4 | 19.148 | 18.028 | 32.657 | 1.00 | 0.00 | O |
| ATOM | 23 | O5  | OCB | X | 4 | 21.348 | 26.792 | 31.492 | 1.00 | 0.00 | O |
| ATOM | 24 | C19 | OCB | X | 4 | 20.329 | 25.523 | 29.125 | 1.00 | 0.00 | C |
| ATOM | 25 | C20 | OCB | X | 4 | 19.033 | 25.022 | 29.803 | 1.00 | 0.00 | C |
| ATOM | 26 | O6  | OCB | X | 4 | 18.998 | 26.851 | 31.511 | 1.00 | 0.00 | O |
| ATOM | 27 | C21 | OCB | X | 4 | 18.466 | 25.748 | 30.866 | 1.00 | 0.00 | C |
| ATOM | 28 | C22 | OCB | X | 4 | 17.320 | 19.565 | 32.281 | 1.00 | 0.00 | C |
| ATOM | 29 | C23 | OCB | X | 4 | 16.722 | 20.469 | 31.444 | 1.00 | 0.00 | C |
| ATOM | 30 | C24 | OCB | X | 4 | 17.422 | 25.197 | 31.573 | 1.00 | 0.00 | C |
| ATOM | 31 | C25 | OCB | X | 4 | 16.847 | 24.016 | 31.122 | 1.00 | 0.00 | C |

|      |    |     |     |   |   |        |        |        |      |      |   |
|------|----|-----|-----|---|---|--------|--------|--------|------|------|---|
| ATOM | 32 | O7  | OCB | X | 4 | 15.671 | 21.081 | 32.055 | 1.00 | 0.00 | O |
| ATOM | 33 | O8  | OCB | X | 4 | 15.816 | 23.443 | 31.855 | 1.00 | 0.00 | O |
| ATOM | 34 | C26 | OCB | X | 4 | 16.101 | 22.326 | 32.689 | 1.00 | 0.00 | C |
| ATOM | 35 | C27 | OCB | X | 4 | 18.425 | 23.821 | 29.342 | 1.00 | 0.00 | C |
| ATOM | 36 | C28 | OCB | X | 4 | 17.297 | 23.367 | 29.992 | 1.00 | 0.00 | C |
| ATOM | 37 | C29 | OCB | X | 4 | 18.448 | 20.226 | 29.735 | 1.00 | 0.00 | C |
| ATOM | 38 | C30 | OCB | X | 4 | 16.671 | 22.026 | 29.497 | 1.00 | 0.00 | C |
| ATOM | 39 | C31 | OCB | X | 4 | 17.269 | 20.836 | 30.201 | 1.00 | 0.00 | C |
| ATOM | 40 | C32 | OCB | X | 4 | 20.162 | 26.541 | 32.272 | 1.00 | 0.00 | C |
| ATOM | 41 | C33 | OCB | X | 4 | 20.504 | 18.030 | 28.671 | 1.00 | 0.00 | C |
| ATOM | 42 | C34 | OCB | X | 4 | 19.429 | 16.943 | 28.375 | 1.00 | 0.00 | C |
| ATOM | 43 | C35 | OCB | X | 4 | 19.457 | 16.546 | 26.965 | 1.00 | 0.00 | C |
| ATOM | 44 | O9  | OCB | X | 4 | 18.760 | 17.166 | 26.205 | 1.00 | 0.00 | O |
| ATOM | 45 | C36 | OCB | X | 4 | 24.160 | 21.984 | 28.190 | 1.00 | 0.00 | C |
| ATOM | 46 | C37 | OCB | X | 4 | 24.892 | 20.722 | 27.873 | 1.00 | 0.00 | C |
| ATOM | 47 | C38 | OCB | X | 4 | 25.247 | 20.709 | 26.386 | 1.00 | 0.00 | C |
| ATOM | 48 | O10 | OCB | X | 4 | 26.352 | 21.014 | 26.024 | 1.00 | 0.00 | O |
| ATOM | 49 | C39 | OCB | X | 4 | 20.348 | 25.349 | 27.582 | 1.00 | 0.00 | C |
| ATOM | 50 | C40 | OCB | X | 4 | 21.643 | 25.869 | 26.956 | 1.00 | 0.00 | C |
| ATOM | 51 | C41 | OCB | X | 4 | 21.330 | 26.116 | 25.462 | 1.00 | 0.00 | C |
| ATOM | 52 | O11 | OCB | X | 4 | 21.275 | 25.194 | 24.657 | 1.00 | 0.00 | O |
| ATOM | 53 | C42 | OCB | X | 4 | 16.476 | 21.929 | 27.906 | 1.00 | 0.00 | C |
| ATOM | 54 | C43 | OCB | X | 4 | 15.593 | 20.727 | 27.478 | 1.00 | 0.00 | C |
| ATOM | 55 | C44 | OCB | X | 4 | 15.202 | 20.869 | 25.993 | 1.00 | 0.00 | C |
| ATOM | 56 | O12 | OCB | X | 4 | 15.798 | 20.392 | 25.121 | 1.00 | 0.00 | O |
| ATOM | 57 | C45 | OCB | X | 4 | 24.763 | 22.773 | 34.217 | 1.00 | 0.00 | C |
| ATOM | 58 | C46 | OCB | X | 4 | 25.797 | 23.264 | 36.896 | 1.00 | 0.00 | C |
| ATOM | 59 | C47 | OCB | X | 4 | 25.121 | 21.732 | 35.095 | 1.00 | 0.00 | C |
| ATOM | 60 | C48 | OCB | X | 4 | 25.012 | 24.030 | 34.722 | 1.00 | 0.00 | C |
| ATOM | 61 | C49 | OCB | X | 4 | 25.446 | 24.315 | 36.022 | 1.00 | 0.00 | C |
| ATOM | 62 | C50 | OCB | X | 4 | 25.638 | 21.982 | 36.414 | 1.00 | 0.00 | C |
| ATOM | 63 | C51 | OCB | X | 4 | 20.202 | 27.434 | 33.493 | 1.00 | 0.00 | C |
| ATOM | 64 | C52 | OCB | X | 4 | 20.230 | 28.899 | 35.833 | 1.00 | 0.00 | C |
| ATOM | 65 | C53 | OCB | X | 4 | 19.056 | 27.898 | 34.069 | 1.00 | 0.00 | C |
| ATOM | 66 | C54 | OCB | X | 4 | 21.387 | 27.823 | 34.024 | 1.00 | 0.00 | C |
| ATOM | 67 | C55 | OCB | X | 4 | 21.366 | 28.704 | 35.118 | 1.00 | 0.00 | C |
| ATOM | 68 | C56 | OCB | X | 4 | 19.037 | 28.558 | 35.252 | 1.00 | 0.00 | C |
| ATOM | 69 | C57 | OCB | X | 4 | 15.569 | 22.583 | 34.080 | 1.00 | 0.00 | C |
| ATOM | 70 | C58 | OCB | X | 4 | 14.590 | 23.020 | 36.710 | 1.00 | 0.00 | C |
| ATOM | 71 | C59 | OCB | X | 4 | 15.409 | 21.506 | 34.955 | 1.00 | 0.00 | C |
| ATOM | 72 | C60 | OCB | X | 4 | 15.302 | 23.884 | 34.543 | 1.00 | 0.00 | C |
| ATOM | 73 | C61 | OCB | X | 4 | 14.785 | 24.123 | 35.818 | 1.00 | 0.00 | C |
| ATOM | 74 | C62 | OCB | X | 4 | 14.939 | 21.742 | 36.304 | 1.00 | 0.00 | C |
| ATOM | 75 | C63 | OCB | X | 4 | 20.162 | 17.990 | 34.808 | 1.00 | 0.00 | C |
| ATOM | 76 | C64 | OCB | X | 4 | 20.187 | 17.267 | 37.558 | 1.00 | 0.00 | C |
| ATOM | 77 | C65 | OCB | X | 4 | 18.998 | 17.648 | 35.460 | 1.00 | 0.00 | C |
| ATOM | 78 | C66 | OCB | X | 4 | 21.356 | 17.969 | 35.578 | 1.00 | 0.00 | C |
| ATOM | 79 | C67 | OCB | X | 4 | 21.381 | 17.635 | 36.913 | 1.00 | 0.00 | C |
| ATOM | 80 | C68 | OCB | X | 4 | 18.991 | 17.388 | 36.855 | 1.00 | 0.00 | C |
| ATOM | 81 | O13 | OCB | X | 4 | 22.540 | 29.192 | 35.646 | 1.00 | 0.00 | O |
| ATOM | 82 | O14 | OCB | X | 4 | 14.504 | 25.338 | 36.381 | 1.00 | 0.00 | O |
| ATOM | 83 | O15 | OCB | X | 4 | 14.749 | 20.696 | 37.183 | 1.00 | 0.00 | O |
| ATOM | 84 | O16 | OCB | X | 4 | 25.630 | 25.549 | 36.525 | 1.00 | 0.00 | O |
| ATOM | 85 | O17 | OCB | X | 4 | 25.880 | 20.861 | 37.226 | 1.00 | 0.00 | O |
| ATOM | 86 | O18 | OCB | X | 4 | 17.863 | 17.178 | 37.570 | 1.00 | 0.00 | O |
| ATOM | 87 | O19 | OCB | X | 4 | 22.556 | 17.497 | 37.670 | 1.00 | 0.00 | O |
| ATOM | 88 | C69 | OCB | X | 4 | 14.946 | 26.528 | 35.762 | 1.00 | 0.00 | C |
| ATOM | 89 | C70 | OCB | X | 4 | 15.731 | 28.906 | 34.724 | 1.00 | 0.00 | C |
| ATOM | 90 | C71 | OCB | X | 4 | 16.249 | 27.006 | 36.169 | 1.00 | 0.00 | C |
| ATOM | 91 | C72 | OCB | X | 4 | 14.142 | 27.135 | 34.830 | 1.00 | 0.00 | C |

|      |     |     |     |   |   |        |        |        |      |      |   |
|------|-----|-----|-----|---|---|--------|--------|--------|------|------|---|
| ATOM | 92  | C73 | OCB | X | 4 | 14.540 | 28.319 | 34.249 | 1.00 | 0.00 | C |
| ATOM | 93  | C74 | OCB | X | 4 | 16.587 | 28.272 | 35.591 | 1.00 | 0.00 | C |
| ATOM | 94  | O20 | OCB | X | 4 | 17.832 | 28.879 | 35.892 | 1.00 | 0.00 | O |
| ATOM | 95  | C75 | OCB | X | 4 | 25.216 | 26.683 | 35.880 | 1.00 | 0.00 | C |
| ATOM | 96  | C76 | OCB | X | 4 | 24.723 | 29.155 | 34.690 | 1.00 | 0.00 | C |
| ATOM | 97  | C77 | OCB | X | 4 | 26.207 | 27.289 | 35.058 | 1.00 | 0.00 | C |
| ATOM | 98  | C78 | OCB | X | 4 | 23.971 | 27.286 | 36.125 | 1.00 | 0.00 | C |
| ATOM | 99  | C79 | OCB | X | 4 | 23.771 | 28.485 | 35.482 | 1.00 | 0.00 | C |
| ATOM | 100 | C80 | OCB | X | 4 | 25.946 | 28.523 | 34.395 | 1.00 | 0.00 | C |
| ATOM | 101 | C81 | OCB | X | 4 | 15.098 | 19.444 | 36.958 | 1.00 | 0.00 | C |
| ATOM | 102 | C82 | OCB | X | 4 | 15.753 | 16.751 | 36.553 | 1.00 | 0.00 | C |
| ATOM | 103 | C83 | OCB | X | 4 | 14.132 | 18.554 | 36.392 | 1.00 | 0.00 | C |
| ATOM | 104 | C84 | OCB | X | 4 | 16.296 | 18.953 | 37.389 | 1.00 | 0.00 | C |
| ATOM | 105 | C85 | OCB | X | 4 | 16.592 | 17.628 | 37.226 | 1.00 | 0.00 | C |
| ATOM | 106 | C86 | OCB | X | 4 | 14.491 | 17.234 | 36.149 | 1.00 | 0.00 | C |
| ATOM | 107 | C87 | OCB | X | 4 | 13.657 | 16.323 | 35.236 | 1.00 | 0.00 | C |
| ATOM | 108 | O21 | OCB | X | 4 | 14.139 | 15.447 | 34.517 | 1.00 | 0.00 | O |
| ATOM | 109 | C88 | OCB | X | 4 | 26.635 | 16.406 | 35.214 | 1.00 | 0.00 | C |
| ATOM | 110 | O22 | OCB | X | 4 | 25.999 | 15.429 | 34.880 | 1.00 | 0.00 | O |
| ATOM | 111 | C89 | OCB | X | 4 | 27.030 | 29.204 | 33.624 | 1.00 | 0.00 | C |
| ATOM | 112 | O23 | OCB | X | 4 | 26.797 | 30.265 | 33.109 | 1.00 | 0.00 | O |
| ATOM | 113 | O24 | OCB | X | 4 | 20.133 | 15.589 | 26.647 | 1.00 | 0.00 | O |
| ATOM | 114 | O25 | OCB | X | 4 | 14.166 | 21.453 | 25.736 | 1.00 | 0.00 | O |
| ATOM | 115 | O26 | OCB | X | 4 | 20.832 | 27.189 | 25.104 | 1.00 | 0.00 | O |
| ATOM | 116 | C90 | OCB | X | 4 | 13.733 | 28.981 | 33.189 | 1.00 | 0.00 | C |
| ATOM | 117 | O27 | OCB | X | 4 | 12.598 | 28.493 | 32.876 | 1.00 | 0.00 | O |
| ATOM | 118 | O28 | OCB | X | 4 | 27.661 | 16.737 | 34.703 | 1.00 | 0.00 | O |
| ATOM | 119 | O29 | OCB | X | 4 | 12.447 | 16.393 | 35.149 | 1.00 | 0.00 | O |
| ATOM | 120 | O30 | OCB | X | 4 | 14.034 | 30.027 | 32.658 | 1.00 | 0.00 | O |
| ATOM | 121 | O31 | OCB | X | 4 | 28.189 | 28.855 | 33.916 | 1.00 | 0.00 | O |
| ATOM | 122 | O32 | OCB | X | 4 | 24.338 | 20.554 | 25.563 | 1.00 | 0.00 | O |
| ATOM | 123 | C91 | OCB | X | 4 | 25.395 | 19.616 | 37.068 | 1.00 | 0.00 | C |
| ATOM | 124 | C92 | OCB | X | 4 | 24.566 | 17.145 | 36.410 | 1.00 | 0.00 | C |
| ATOM | 125 | C93 | OCB | X | 4 | 24.172 | 19.192 | 37.537 | 1.00 | 0.00 | C |
| ATOM | 126 | C94 | OCB | X | 4 | 26.331 | 18.765 | 36.454 | 1.00 | 0.00 | C |
| ATOM | 127 | C95 | OCB | X | 4 | 25.901 | 17.459 | 36.076 | 1.00 | 0.00 | C |
| ATOM | 128 | C96 | OCB | X | 4 | 23.757 | 17.951 | 37.210 | 1.00 | 0.00 | C |
| ATOM | 129 | C97 | OCB | X | 4 | 23.332 | 20.159 | 38.269 | 1.00 | 0.00 | C |
| ATOM | 130 | C98 | OCB | X | 4 | 22.946 | 26.784 | 37.140 | 1.00 | 0.00 | C |
| ATOM | 131 | C99 | OCB | X | 4 | 17.163 | 26.247 | 37.142 | 1.00 | 0.00 | C |
| ATOM | 132 | C   | OCB | X | 4 | 17.326 | 19.988 | 37.849 | 1.00 | 0.00 | C |
| ATOM | 133 | H1  | OCB | X | 4 | 21.812 | 23.138 | 28.756 | 1.00 | 0.00 | H |
| ATOM | 134 | H2  | OCB | X | 4 | 23.702 | 25.969 | 32.334 | 1.00 | 0.00 | H |
| ATOM | 135 | H3  | OCB | X | 4 | 25.027 | 22.067 | 30.012 | 1.00 | 0.00 | H |
| ATOM | 136 | H4  | OCB | X | 4 | 23.255 | 22.555 | 32.712 | 1.00 | 0.00 | H |
| ATOM | 137 | H5  | OCB | X | 4 | 21.863 | 20.328 | 28.951 | 1.00 | 0.00 | H |
| ATOM | 138 | H6  | OCB | X | 4 | 23.558 | 19.324 | 33.404 | 1.00 | 0.00 | H |
| ATOM | 139 | H7  | OCB | X | 4 | 20.312 | 17.434 | 30.476 | 1.00 | 0.00 | H |
| ATOM | 140 | H8  | OCB | X | 4 | 20.243 | 19.599 | 33.334 | 1.00 | 0.00 | H |
| ATOM | 141 | H9  | OCB | X | 4 | 20.283 | 26.607 | 29.252 | 1.00 | 0.00 | H |
| ATOM | 142 | H10 | OCB | X | 4 | 16.934 | 19.364 | 33.277 | 1.00 | 0.00 | H |
| ATOM | 143 | H11 | OCB | X | 4 | 17.062 | 25.694 | 32.471 | 1.00 | 0.00 | H |
| ATOM | 144 | H12 | OCB | X | 4 | 17.199 | 22.272 | 32.703 | 1.00 | 0.00 | H |
| ATOM | 145 | H13 | OCB | X | 4 | 18.825 | 23.256 | 28.503 | 1.00 | 0.00 | H |
| ATOM | 146 | H14 | OCB | X | 4 | 18.914 | 20.551 | 28.809 | 1.00 | 0.00 | H |
| ATOM | 147 | H15 | OCB | X | 4 | 15.634 | 22.197 | 29.793 | 1.00 | 0.00 | H |
| ATOM | 148 | H16 | OCB | X | 4 | 20.167 | 25.471 | 32.529 | 1.00 | 0.00 | H |
| ATOM | 149 | H17 | OCB | X | 4 | 20.490 | 18.874 | 27.977 | 1.00 | 0.00 | H |
| ATOM | 150 | H18 | OCB | X | 4 | 21.487 | 17.626 | 28.421 | 1.00 | 0.00 | H |
| ATOM | 151 | H19 | OCB | X | 4 | 19.662 | 16.024 | 28.917 | 1.00 | 0.00 | H |



|      |     |     |     |   |   |        |        |        |      |      |   |
|------|-----|-----|-----|---|---|--------|--------|--------|------|------|---|
| ATOM | 152 | H20 | OCB | X | 4 | 18.444 | 17.218 | 28.758 | 1.00 | 0.00 | H |
| ATOM | 153 | H21 | OCB | X | 4 | 24.779 | 22.759 | 27.734 | 1.00 | 0.00 | H |
| ATOM | 154 | H22 | OCB | X | 4 | 23.290 | 22.092 | 27.539 | 1.00 | 0.00 | H |
| ATOM | 155 | H23 | OCB | X | 4 | 25.854 | 20.561 | 28.364 | 1.00 | 0.00 | H |
| ATOM | 156 | H24 | OCB | X | 4 | 24.365 | 19.810 | 28.160 | 1.00 | 0.00 | H |
| ATOM | 157 | H25 | OCB | X | 4 | 20.200 | 24.377 | 27.106 | 1.00 | 0.00 | H |
| ATOM | 158 | H26 | OCB | X | 4 | 19.506 | 25.904 | 27.163 | 1.00 | 0.00 | H |
| ATOM | 159 | H27 | OCB | X | 4 | 21.867 | 26.806 | 27.472 | 1.00 | 0.00 | H |
| ATOM | 160 | H28 | OCB | X | 4 | 22.509 | 25.218 | 27.092 | 1.00 | 0.00 | H |
| ATOM | 161 | H29 | OCB | X | 4 | 15.892 | 22.816 | 27.653 | 1.00 | 0.00 | H |
| ATOM | 162 | H30 | OCB | X | 4 | 17.408 | 21.804 | 27.351 | 1.00 | 0.00 | H |
| ATOM | 163 | H31 | OCB | X | 4 | 16.147 | 19.806 | 27.674 | 1.00 | 0.00 | H |
| ATOM | 164 | H32 | OCB | X | 4 | 14.703 | 20.808 | 28.106 | 1.00 | 0.00 | H |
| ATOM | 165 | H33 | OCB | X | 4 | 26.072 | 23.437 | 37.933 | 1.00 | 0.00 | H |
| ATOM | 166 | H34 | OCB | X | 4 | 25.080 | 20.738 | 34.656 | 1.00 | 0.00 | H |
| ATOM | 167 | H35 | OCB | X | 4 | 24.943 | 24.856 | 34.019 | 1.00 | 0.00 | H |
| ATOM | 168 | H36 | OCB | X | 4 | 20.176 | 29.407 | 36.792 | 1.00 | 0.00 | H |
| ATOM | 169 | H37 | OCB | X | 4 | 18.115 | 27.591 | 33.619 | 1.00 | 0.00 | H |
| ATOM | 170 | H38 | OCB | X | 4 | 22.370 | 27.631 | 33.602 | 1.00 | 0.00 | H |
| ATOM | 171 | H39 | OCB | X | 4 | 14.236 | 23.204 | 37.721 | 1.00 | 0.00 | H |
| ATOM | 172 | H40 | OCB | X | 4 | 15.674 | 20.513 | 34.603 | 1.00 | 0.00 | H |
| ATOM | 173 | H41 | OCB | X | 4 | 15.519 | 24.768 | 33.949 | 1.00 | 0.00 | H |
| ATOM | 174 | H42 | OCB | X | 4 | 20.197 | 17.053 | 38.624 | 1.00 | 0.00 | H |
| ATOM | 175 | H43 | OCB | X | 4 | 18.035 | 17.646 | 34.957 | 1.00 | 0.00 | H |
| ATOM | 176 | H44 | OCB | X | 4 | 22.310 | 18.183 | 35.104 | 1.00 | 0.00 | H |
| ATOM | 177 | H45 | OCB | X | 4 | 16.001 | 29.882 | 34.329 | 1.00 | 0.00 | H |
| ATOM | 178 | H46 | OCB | X | 4 | 13.253 | 26.612 | 34.489 | 1.00 | 0.00 | H |
| ATOM | 179 | H47 | OCB | X | 4 | 24.521 | 30.121 | 34.234 | 1.00 | 0.00 | H |
| ATOM | 180 | H48 | OCB | X | 4 | 27.179 | 26.826 | 34.906 | 1.00 | 0.00 | H |
| ATOM | 181 | H49 | OCB | X | 4 | 15.976 | 15.695 | 36.425 | 1.00 | 0.00 | H |
| ATOM | 182 | H50 | OCB | X | 4 | 13.181 | 18.984 | 36.088 | 1.00 | 0.00 | H |
| ATOM | 183 | H51 | OCB | X | 4 | 24.107 | 16.229 | 36.049 | 1.00 | 0.00 | H |
| ATOM | 184 | H52 | OCB | X | 4 | 27.339 | 19.077 | 36.197 | 1.00 | 0.00 | H |
| ATOM | 185 | H53 | OCB | X | 4 | 22.853 | 20.828 | 37.552 | 1.00 | 0.00 | H |
| ATOM | 186 | H54 | OCB | X | 4 | 22.597 | 19.593 | 38.846 | 1.00 | 0.00 | H |
| ATOM | 187 | H55 | OCB | X | 4 | 23.882 | 20.798 | 38.963 | 1.00 | 0.00 | H |
| ATOM | 188 | H56 | OCB | X | 4 | 23.468 | 26.378 | 38.009 | 1.00 | 0.00 | H |
| ATOM | 189 | H57 | OCB | X | 4 | 22.348 | 27.634 | 37.475 | 1.00 | 0.00 | H |
| ATOM | 190 | H58 | OCB | X | 4 | 22.353 | 25.996 | 36.670 | 1.00 | 0.00 | H |
| ATOM | 191 | H59 | OCB | X | 4 | 16.673 | 25.381 | 37.592 | 1.00 | 0.00 | H |
| ATOM | 192 | H60 | OCB | X | 4 | 18.104 | 25.932 | 36.686 | 1.00 | 0.00 | H |
| ATOM | 193 | H61 | OCB | X | 4 | 17.444 | 26.893 | 37.975 | 1.00 | 0.00 | H |
| ATOM | 194 | H62 | OCB | X | 4 | 17.608 | 20.634 | 37.015 | 1.00 | 0.00 | H |
| ATOM | 195 | H63 | OCB | X | 4 | 16.991 | 20.645 | 38.655 | 1.00 | 0.00 | H |
| ATOM | 196 | H64 | OCB | X | 4 | 18.261 | 19.534 | 38.183 | 1.00 | 0.00 | H |
| ATOM | 197 | C1  | MOL | X | 5 | 19.085 | 23.161 | 37.149 | 1.00 | 0.00 | C |
| ATOM | 198 | C2  | MOL | X | 5 | 19.077 | 23.013 | 35.799 | 1.00 | 0.00 | C |
| ATOM | 199 | C3  | MOL | X | 5 | 20.320 | 22.883 | 35.137 | 1.00 | 0.00 | C |
| ATOM | 200 | C4  | MOL | X | 5 | 21.494 | 23.061 | 35.862 | 1.00 | 0.00 | C |
| ATOM | 201 | C5  | MOL | X | 5 | 21.501 | 23.252 | 37.227 | 1.00 | 0.00 | C |
| ATOM | 202 | C6  | MOL | X | 5 | 20.283 | 23.390 | 37.896 | 1.00 | 0.00 | C |
| ATOM | 203 | C7  | MOL | X | 5 | 20.213 | 22.632 | 33.730 | 1.00 | 0.00 | C |
| ATOM | 204 | N1  | MOL | X | 5 | 20.132 | 22.555 | 32.610 | 1.00 | 0.00 | N |
| ATOM | 205 | C8  | MOL | X | 5 | 20.169 | 23.552 | 39.390 | 1.00 | 0.00 | C |
| ATOM | 206 | O1  | MOL | X | 5 | 21.179 | 23.533 | 40.047 | 1.00 | 0.00 | O |
| ATOM | 207 | O2  | MOL | X | 5 | 19.064 | 23.627 | 39.896 | 1.00 | 0.00 | O |
| ATOM | 208 | H1  | MOL | X | 5 | 18.142 | 23.140 | 37.690 | 1.00 | 0.00 | H |
| ATOM | 209 | H2  | MOL | X | 5 | 18.164 | 22.886 | 35.223 | 1.00 | 0.00 | H |
| ATOM | 210 | H3  | MOL | X | 5 | 22.362 | 22.928 | 35.221 | 1.00 | 0.00 | H |
| ATOM | 211 | H4  | MOL | X | 5 | 22.375 | 23.548 | 37.801 | 1.00 | 0.00 | H |

END

**OAH-G3**

|      |    |     |     |   |   |        |        |        |      |      |   |
|------|----|-----|-----|---|---|--------|--------|--------|------|------|---|
| ATOM | 1  | C1  | OCT | X | 4 | 17.696 | 23.291 | 29.292 | 1.00 | 0.00 | C |
| ATOM | 2  | C2  | OCT | X | 4 | 18.946 | 25.421 | 30.648 | 1.00 | 0.00 | C |
| ATOM | 3  | C3  | OCT | X | 4 | 18.943 | 23.777 | 28.803 | 1.00 | 0.00 | C |
| ATOM | 4  | C4  | OCT | X | 4 | 17.126 | 23.811 | 30.469 | 1.00 | 0.00 | C |
| ATOM | 5  | C5  | OCT | X | 4 | 17.702 | 24.894 | 31.105 | 1.00 | 0.00 | C |
| ATOM | 6  | C6  | OCT | X | 4 | 19.559 | 24.879 | 29.491 | 1.00 | 0.00 | C |
| ATOM | 7  | O1  | OCT | X | 4 | 19.630 | 26.336 | 31.457 | 1.00 | 0.00 | O |
| ATOM | 8  | C7  | OCT | X | 4 | 20.977 | 25.387 | 29.128 | 1.00 | 0.00 | C |
| ATOM | 9  | C8  | OCT | X | 4 | 20.582 | 25.832 | 32.354 | 1.00 | 0.00 | C |
| ATOM | 10 | O2  | OCT | X | 4 | 21.902 | 26.029 | 31.766 | 1.00 | 0.00 | O |
| ATOM | 11 | C9  | OCT | X | 4 | 22.517 | 24.956 | 31.131 | 1.00 | 0.00 | C |
| ATOM | 12 | C10 | OCT | X | 4 | 22.128 | 24.601 | 29.833 | 1.00 | 0.00 | C |
| ATOM | 13 | C11 | OCT | X | 4 | 22.668 | 23.448 | 29.292 | 1.00 | 0.00 | C |
| ATOM | 14 | C12 | OCT | X | 4 | 23.522 | 24.260 | 31.833 | 1.00 | 0.00 | C |
| ATOM | 15 | C13 | OCT | X | 4 | 23.678 | 22.737 | 29.960 | 1.00 | 0.00 | C |
| ATOM | 16 | C14 | OCT | X | 4 | 24.037 | 23.124 | 31.201 | 1.00 | 0.00 | C |
| ATOM | 17 | O3  | OCT | X | 4 | 24.969 | 22.369 | 31.846 | 1.00 | 0.00 | O |
| ATOM | 18 | C15 | OCT | X | 4 | 24.266 | 21.413 | 29.308 | 1.00 | 0.00 | C |
| ATOM | 19 | C16 | OCT | X | 4 | 23.407 | 20.198 | 29.704 | 1.00 | 0.00 | C |
| ATOM | 20 | C17 | OCT | X | 4 | 23.815 | 19.547 | 30.920 | 1.00 | 0.00 | C |
| ATOM | 21 | C18 | OCT | X | 4 | 24.441 | 21.219 | 32.606 | 1.00 | 0.00 | C |
| ATOM | 22 | O4  | OCT | X | 4 | 24.787 | 20.035 | 31.803 | 1.00 | 0.00 | O |
| ATOM | 23 | O5  | OCT | X | 4 | 15.988 | 23.230 | 31.094 | 1.00 | 0.00 | O |
| ATOM | 24 | C19 | OCT | X | 4 | 17.067 | 22.089 | 28.590 | 1.00 | 0.00 | C |
| ATOM | 25 | C20 | OCT | X | 4 | 17.496 | 20.717 | 29.183 | 1.00 | 0.00 | C |
| ATOM | 26 | O6  | OCT | X | 4 | 15.802 | 20.904 | 30.908 | 1.00 | 0.00 | O |
| ATOM | 27 | C21 | OCT | X | 4 | 16.801 | 20.210 | 30.316 | 1.00 | 0.00 | C |
| ATOM | 28 | C22 | OCT | X | 4 | 23.102 | 18.453 | 31.353 | 1.00 | 0.00 | C |
| ATOM | 29 | C23 | OCT | X | 4 | 21.955 | 18.022 | 30.726 | 1.00 | 0.00 | C |
| ATOM | 30 | C24 | OCT | X | 4 | 17.182 | 19.024 | 30.873 | 1.00 | 0.00 | C |
| ATOM | 31 | C25 | OCT | X | 4 | 18.293 | 18.365 | 30.404 | 1.00 | 0.00 | C |
| ATOM | 32 | O7  | OCT | X | 4 | 21.161 | 17.110 | 31.423 | 1.00 | 0.00 | O |
| ATOM | 33 | O8  | OCT | X | 4 | 18.777 | 17.295 | 31.111 | 1.00 | 0.00 | O |
| ATOM | 34 | C26 | OCT | X | 4 | 19.917 | 17.585 | 32.052 | 1.00 | 0.00 | C |
| ATOM | 35 | C27 | OCT | X | 4 | 18.612 | 20.024 | 28.682 | 1.00 | 0.00 | C |
| ATOM | 36 | C28 | OCT | X | 4 | 19.028 | 18.859 | 29.286 | 1.00 | 0.00 | C |
| ATOM | 37 | C29 | OCT | X | 4 | 22.228 | 19.764 | 29.073 | 1.00 | 0.00 | C |
| ATOM | 38 | C30 | OCT | X | 4 | 20.236 | 18.012 | 28.719 | 1.00 | 0.00 | C |
| ATOM | 39 | C31 | OCT | X | 4 | 21.536 | 18.548 | 29.470 | 1.00 | 0.00 | C |
| ATOM | 40 | C32 | OCT | X | 4 | 16.177 | 22.015 | 31.760 | 1.00 | 0.00 | C |
| ATOM | 41 | C33 | OCT | X | 4 | 24.532 | 21.420 | 27.735 | 1.00 | 0.00 | C |
| ATOM | 42 | C34 | OCT | X | 4 | 25.782 | 22.041 | 27.267 | 1.00 | 0.00 | C |
| ATOM | 43 | C35 | OCT | X | 4 | 25.900 | 21.718 | 25.814 | 1.00 | 0.00 | C |
| ATOM | 44 | O9  | OCT | X | 4 | 26.004 | 20.550 | 25.506 | 1.00 | 0.00 | O |
| ATOM | 45 | C36 | OCT | X | 4 | 21.096 | 25.437 | 27.598 | 1.00 | 0.00 | C |
| ATOM | 46 | C37 | OCT | X | 4 | 22.090 | 26.425 | 27.136 | 1.00 | 0.00 | C |
| ATOM | 47 | C38 | OCT | X | 4 | 22.097 | 26.423 | 25.641 | 1.00 | 0.00 | C |
| ATOM | 48 | O10 | OCT | X | 4 | 21.522 | 27.271 | 24.997 | 1.00 | 0.00 | O |
| ATOM | 49 | C39 | OCT | X | 4 | 17.156 | 22.130 | 27.047 | 1.00 | 0.00 | C |
| ATOM | 50 | C40 | OCT | X | 4 | 16.428 | 20.998 | 26.341 | 1.00 | 0.00 | C |
| ATOM | 51 | C41 | OCT | X | 4 | 16.318 | 21.331 | 24.840 | 1.00 | 0.00 | C |
| ATOM | 52 | O11 | OCT | X | 4 | 17.285 | 21.541 | 24.214 | 1.00 | 0.00 | O |
| ATOM | 53 | C42 | OCT | X | 4 | 20.268 | 17.852 | 27.199 | 1.00 | 0.00 | C |
| ATOM | 54 | C43 | OCT | X | 4 | 19.044 | 17.236 | 26.545 | 1.00 | 0.00 | C |
| ATOM | 55 | C44 | OCT | X | 4 | 19.076 | 17.012 | 25.058 | 1.00 | 0.00 | C |
| ATOM | 56 | O12 | OCT | X | 4 | 18.374 | 17.771 | 24.401 | 1.00 | 0.00 | O |

|      |     |     |     |   |   |        |        |        |      |      |   |
|------|-----|-----|-----|---|---|--------|--------|--------|------|------|---|
| ATOM | 57  | C45 | OCT | X | 4 | 20.402 | 26.445 | 33.703 | 1.00 | 0.00 | C |
| ATOM | 58  | C46 | OCT | X | 4 | 20.084 | 26.799 | 36.429 | 1.00 | 0.00 | C |
| ATOM | 59  | C47 | OCT | X | 4 | 21.572 | 26.388 | 34.587 | 1.00 | 0.00 | C |
| ATOM | 60  | C48 | OCT | X | 4 | 19.152 | 26.771 | 34.219 | 1.00 | 0.00 | C |
| ATOM | 61  | C49 | OCT | X | 4 | 19.022 | 27.030 | 35.592 | 1.00 | 0.00 | C |
| ATOM | 62  | C50 | OCT | X | 4 | 21.343 | 26.536 | 35.974 | 1.00 | 0.00 | C |
| ATOM | 63  | C51 | OCT | X | 4 | 15.456 | 22.084 | 33.147 | 1.00 | 0.00 | C |
| ATOM | 64  | C52 | OCT | X | 4 | 14.194 | 22.129 | 35.544 | 1.00 | 0.00 | C |
| ATOM | 65  | C53 | OCT | X | 4 | 15.190 | 20.833 | 33.764 | 1.00 | 0.00 | C |
| ATOM | 66  | C54 | OCT | X | 4 | 15.115 | 23.309 | 33.678 | 1.00 | 0.00 | C |
| ATOM | 67  | C55 | OCT | X | 4 | 14.399 | 23.295 | 34.833 | 1.00 | 0.00 | C |
| ATOM | 68  | C56 | OCT | X | 4 | 14.624 | 20.890 | 35.055 | 1.00 | 0.00 | C |
| ATOM | 69  | C57 | OCT | X | 4 | 19.713 | 16.909 | 33.418 | 1.00 | 0.00 | C |
| ATOM | 70  | C58 | OCT | X | 4 | 19.449 | 15.884 | 35.965 | 1.00 | 0.00 | C |
| ATOM | 71  | C59 | OCT | X | 4 | 20.806 | 16.747 | 34.253 | 1.00 | 0.00 | C |
| ATOM | 72  | C60 | OCT | X | 4 | 18.434 | 16.780 | 33.964 | 1.00 | 0.00 | C |
| ATOM | 73  | C61 | OCT | X | 4 | 18.343 | 16.211 | 35.179 | 1.00 | 0.00 | C |
| ATOM | 74  | C62 | OCT | X | 4 | 20.692 | 16.257 | 35.559 | 1.00 | 0.00 | C |
| ATOM | 75  | C63 | OCT | X | 4 | 25.043 | 21.207 | 33.956 | 1.00 | 0.00 | C |
| ATOM | 76  | C64 | OCT | X | 4 | 26.123 | 21.135 | 36.490 | 1.00 | 0.00 | C |
| ATOM | 77  | C65 | OCT | X | 4 | 25.102 | 19.982 | 34.652 | 1.00 | 0.00 | C |
| ATOM | 78  | C66 | OCT | X | 4 | 25.342 | 22.460 | 34.606 | 1.00 | 0.00 | C |
| ATOM | 79  | C67 | OCT | X | 4 | 25.881 | 22.390 | 35.938 | 1.00 | 0.00 | C |
| ATOM | 80  | C68 | OCT | X | 4 | 25.616 | 19.963 | 35.947 | 1.00 | 0.00 | C |
| ATOM | 81  | O13 | OCT | X | 4 | 13.983 | 24.491 | 35.386 | 1.00 | 0.00 | O |
| ATOM | 82  | O14 | OCT | X | 4 | 17.094 | 15.888 | 35.612 | 1.00 | 0.00 | O |
| ATOM | 83  | O15 | OCT | X | 4 | 21.661 | 16.065 | 36.506 | 1.00 | 0.00 | O |
| ATOM | 84  | O16 | OCT | X | 4 | 17.801 | 27.287 | 36.188 | 1.00 | 0.00 | O |
| ATOM | 85  | O17 | OCT | X | 4 | 22.401 | 26.418 | 36.928 | 1.00 | 0.00 | O |
| ATOM | 86  | O18 | OCT | X | 4 | 25.675 | 18.804 | 36.650 | 1.00 | 0.00 | O |
| ATOM | 87  | O19 | OCT | X | 4 | 26.242 | 23.594 | 36.607 | 1.00 | 0.00 | O |
| ATOM | 88  | C69 | OCT | X | 4 | 16.003 | 16.617 | 35.223 | 1.00 | 0.00 | C |
| ATOM | 89  | C70 | OCT | X | 4 | 13.718 | 17.965 | 34.421 | 1.00 | 0.00 | C |
| ATOM | 90  | C71 | OCT | X | 4 | 15.700 | 17.822 | 35.818 | 1.00 | 0.00 | C |
| ATOM | 91  | C72 | OCT | X | 4 | 15.135 | 16.070 | 34.304 | 1.00 | 0.00 | C |
| ATOM | 92  | C73 | OCT | X | 4 | 13.921 | 16.680 | 33.990 | 1.00 | 0.00 | C |
| ATOM | 93  | C74 | OCT | X | 4 | 14.555 | 18.517 | 35.361 | 1.00 | 0.00 | C |
| ATOM | 94  | O20 | OCT | X | 4 | 14.264 | 19.774 | 35.873 | 1.00 | 0.00 | O |
| ATOM | 95  | C75 | OCT | X | 4 | 16.564 | 27.068 | 35.547 | 1.00 | 0.00 | C |
| ATOM | 96  | C76 | OCT | X | 4 | 13.976 | 26.771 | 34.730 | 1.00 | 0.00 | C |
| ATOM | 97  | C77 | OCT | X | 4 | 15.941 | 28.125 | 34.926 | 1.00 | 0.00 | C |
| ATOM | 98  | C78 | OCT | X | 4 | 15.989 | 25.816 | 35.642 | 1.00 | 0.00 | C |
| ATOM | 99  | C79 | OCT | X | 4 | 14.683 | 25.673 | 35.235 | 1.00 | 0.00 | C |
| ATOM | 100 | C80 | OCT | X | 4 | 14.653 | 27.958 | 34.367 | 1.00 | 0.00 | C |
| ATOM | 101 | C81 | OCT | X | 4 | 23.000 | 16.251 | 36.316 | 1.00 | 0.00 | C |
| ATOM | 102 | C82 | OCT | X | 4 | 25.787 | 16.593 | 35.718 | 1.00 | 0.00 | C |
| ATOM | 103 | C83 | OCT | X | 4 | 23.729 | 15.259 | 35.640 | 1.00 | 0.00 | C |
| ATOM | 104 | C84 | OCT | X | 4 | 23.687 | 17.440 | 36.549 | 1.00 | 0.00 | C |
| ATOM | 105 | C85 | OCT | X | 4 | 25.042 | 17.592 | 36.352 | 1.00 | 0.00 | C |
| ATOM | 106 | C86 | OCT | X | 4 | 25.115 | 15.437 | 35.403 | 1.00 | 0.00 | C |
| ATOM | 107 | C87 | OCT | X | 4 | 25.881 | 14.289 | 34.687 | 1.00 | 0.00 | C |
| ATOM | 108 | O21 | OCT | X | 4 | 27.080 | 14.210 | 34.748 | 1.00 | 0.00 | O |
| ATOM | 109 | C88 | OCT | X | 4 | 26.835 | 28.506 | 36.025 | 1.00 | 0.00 | C |
| ATOM | 110 | O22 | OCT | X | 4 | 26.332 | 29.544 | 35.573 | 1.00 | 0.00 | O |
| ATOM | 111 | C89 | OCT | X | 4 | 13.909 | 28.982 | 33.557 | 1.00 | 0.00 | C |
| ATOM | 112 | O23 | OCT | X | 4 | 12.846 | 28.820 | 33.029 | 1.00 | 0.00 | O |
| ATOM | 113 | O24 | OCT | X | 4 | 26.034 | 22.591 | 24.947 | 1.00 | 0.00 | O |
| ATOM | 114 | O25 | OCT | X | 4 | 20.072 | 16.510 | 24.552 | 1.00 | 0.00 | O |
| ATOM | 115 | O26 | OCT | X | 4 | 15.218 | 21.740 | 24.451 | 1.00 | 0.00 | O |
| ATOM | 116 | C90 | OCT | X | 4 | 12.918 | 15.987 | 33.103 | 1.00 | 0.00 | C |

|      |     |     |     |   |   |        |        |        |      |      |   |
|------|-----|-----|-----|---|---|--------|--------|--------|------|------|---|
| ATOM | 117 | O27 | OCT | X | 4 | 12.207 | 16.657 | 32.388 | 1.00 | 0.00 | O |
| ATOM | 118 | O28 | OCT | X | 4 | 28.045 | 28.457 | 36.148 | 1.00 | 0.00 | O |
| ATOM | 119 | O29 | OCT | X | 4 | 25.273 | 13.326 | 34.227 | 1.00 | 0.00 | O |
| ATOM | 120 | O30 | OCT | X | 4 | 12.939 | 14.740 | 33.057 | 1.00 | 0.00 | O |
| ATOM | 121 | O31 | OCT | X | 4 | 14.391 | 30.098 | 33.489 | 1.00 | 0.00 | O |
| ATOM | 122 | O32 | OCT | X | 4 | 22.723 | 25.522 | 25.058 | 1.00 | 0.00 | O |
| ATOM | 123 | C91 | OCT | X | 4 | 23.716 | 26.354 | 36.679 | 1.00 | 0.00 | C |
| ATOM | 124 | C92 | OCT | X | 4 | 26.475 | 25.922 | 36.191 | 1.00 | 0.00 | C |
| ATOM | 125 | C93 | OCT | X | 4 | 24.274 | 25.037 | 36.760 | 1.00 | 0.00 | C |
| ATOM | 126 | C94 | OCT | X | 4 | 24.588 | 27.374 | 36.390 | 1.00 | 0.00 | C |
| ATOM | 127 | C95 | OCT | X | 4 | 25.953 | 27.198 | 36.226 | 1.00 | 0.00 | C |
| ATOM | 128 | C96 | OCT | X | 4 | 25.655 | 24.849 | 36.471 | 1.00 | 0.00 | C |
| ATOM | 129 | H1  | OCT | X | 4 | 19.392 | 23.312 | 27.929 | 1.00 | 0.00 | H |
| ATOM | 130 | H2  | OCT | X | 4 | 17.238 | 25.401 | 31.947 | 1.00 | 0.00 | H |
| ATOM | 131 | H3  | OCT | X | 4 | 21.039 | 26.406 | 29.515 | 1.00 | 0.00 | H |
| ATOM | 132 | H4  | OCT | X | 4 | 20.516 | 24.735 | 32.397 | 1.00 | 0.00 | H |
| ATOM | 133 | H5  | OCT | X | 4 | 22.342 | 23.049 | 28.335 | 1.00 | 0.00 | H |
| ATOM | 134 | H6  | OCT | X | 4 | 23.828 | 24.614 | 32.814 | 1.00 | 0.00 | H |
| ATOM | 135 | H7  | OCT | X | 4 | 25.279 | 21.313 | 29.705 | 1.00 | 0.00 | H |
| ATOM | 136 | H8  | OCT | X | 4 | 23.342 | 21.220 | 32.650 | 1.00 | 0.00 | H |
| ATOM | 137 | H9  | OCT | X | 4 | 15.975 | 22.095 | 28.618 | 1.00 | 0.00 | H |
| ATOM | 138 | H10 | OCT | X | 4 | 23.409 | 17.947 | 32.265 | 1.00 | 0.00 | H |
| ATOM | 139 | H11 | OCT | X | 4 | 16.576 | 18.545 | 31.637 | 1.00 | 0.00 | H |
| ATOM | 140 | H12 | OCT | X | 4 | 19.917 | 18.678 | 32.173 | 1.00 | 0.00 | H |
| ATOM | 141 | H13 | OCT | X | 4 | 19.239 | 20.469 | 27.913 | 1.00 | 0.00 | H |
| ATOM | 142 | H14 | OCT | X | 4 | 21.963 | 20.247 | 28.136 | 1.00 | 0.00 | H |
| ATOM | 143 | H15 | OCT | X | 4 | 20.068 | 16.978 | 29.027 | 1.00 | 0.00 | H |
| ATOM | 144 | H16 | OCT | X | 4 | 17.237 | 21.769 | 31.924 | 1.00 | 0.00 | H |
| ATOM | 145 | H17 | OCT | X | 4 | 24.463 | 20.429 | 27.280 | 1.00 | 0.00 | H |
| ATOM | 146 | H18 | OCT | X | 4 | 23.655 | 21.920 | 27.318 | 1.00 | 0.00 | H |
| ATOM | 147 | H19 | OCT | X | 4 | 25.683 | 23.114 | 27.440 | 1.00 | 0.00 | H |
| ATOM | 148 | H20 | OCT | X | 4 | 26.551 | 21.614 | 27.915 | 1.00 | 0.00 | H |
| ATOM | 149 | H21 | OCT | X | 4 | 20.109 | 25.764 | 27.263 | 1.00 | 0.00 | H |
| ATOM | 150 | H22 | OCT | X | 4 | 21.217 | 24.456 | 27.134 | 1.00 | 0.00 | H |
| ATOM | 151 | H23 | OCT | X | 4 | 21.981 | 27.440 | 27.522 | 1.00 | 0.00 | H |
| ATOM | 152 | H24 | OCT | X | 4 | 23.081 | 26.134 | 27.491 | 1.00 | 0.00 | H |
| ATOM | 153 | H25 | OCT | X | 4 | 16.617 | 23.028 | 26.739 | 1.00 | 0.00 | H |
| ATOM | 154 | H26 | OCT | X | 4 | 18.181 | 22.276 | 26.701 | 1.00 | 0.00 | H |
| ATOM | 155 | H27 | OCT | X | 4 | 16.944 | 20.037 | 26.389 | 1.00 | 0.00 | H |
| ATOM | 156 | H28 | OCT | X | 4 | 15.428 | 20.761 | 26.710 | 1.00 | 0.00 | H |
| ATOM | 157 | H29 | OCT | X | 4 | 20.792 | 18.711 | 26.775 | 1.00 | 0.00 | H |
| ATOM | 158 | H30 | OCT | X | 4 | 21.039 | 17.082 | 27.125 | 1.00 | 0.00 | H |
| ATOM | 159 | H31 | OCT | X | 4 | 18.847 | 16.277 | 27.030 | 1.00 | 0.00 | H |
| ATOM | 160 | H32 | OCT | X | 4 | 18.149 | 17.799 | 26.820 | 1.00 | 0.00 | H |
| ATOM | 161 | H33 | OCT | X | 4 | 19.941 | 26.789 | 37.506 | 1.00 | 0.00 | H |
| ATOM | 162 | H34 | OCT | X | 4 | 22.598 | 26.355 | 34.229 | 1.00 | 0.00 | H |
| ATOM | 163 | H35 | OCT | X | 4 | 18.275 | 26.649 | 33.588 | 1.00 | 0.00 | H |
| ATOM | 164 | H36 | OCT | X | 4 | 13.720 | 22.244 | 36.516 | 1.00 | 0.00 | H |
| ATOM | 165 | H37 | OCT | X | 4 | 15.429 | 19.954 | 33.170 | 1.00 | 0.00 | H |
| ATOM | 166 | H38 | OCT | X | 4 | 15.425 | 24.256 | 33.244 | 1.00 | 0.00 | H |
| ATOM | 167 | H39 | OCT | X | 4 | 19.335 | 15.425 | 36.944 | 1.00 | 0.00 | H |
| ATOM | 168 | H40 | OCT | X | 4 | 21.805 | 16.978 | 33.892 | 1.00 | 0.00 | H |
| ATOM | 169 | H41 | OCT | X | 4 | 17.564 | 16.918 | 33.327 | 1.00 | 0.00 | H |
| ATOM | 170 | H42 | OCT | X | 4 | 26.750 | 20.991 | 37.366 | 1.00 | 0.00 | H |
| ATOM | 171 | H43 | OCT | X | 4 | 24.818 | 19.066 | 34.141 | 1.00 | 0.00 | H |
| ATOM | 172 | H44 | OCT | X | 4 | 25.154 | 23.441 | 34.177 | 1.00 | 0.00 | H |
| ATOM | 173 | H45 | OCT | X | 4 | 12.883 | 18.586 | 34.108 | 1.00 | 0.00 | H |
| ATOM | 174 | H46 | OCT | X | 4 | 16.375 | 18.230 | 36.566 | 1.00 | 0.00 | H |
| ATOM | 175 | H47 | OCT | X | 4 | 15.492 | 15.198 | 33.762 | 1.00 | 0.00 | H |
| ATOM | 176 | H48 | OCT | X | 4 | 12.924 | 26.576 | 34.541 | 1.00 | 0.00 | H |

|      |     |     |     |   |   |        |        |        |      |      |   |
|------|-----|-----|-----|---|---|--------|--------|--------|------|------|---|
| ATOM | 177 | H49 | OCT | X | 4 | 16.319 | 29.143 | 34.960 | 1.00 | 0.00 | H |
| ATOM | 178 | H50 | OCT | X | 4 | 16.610 | 25.059 | 36.112 | 1.00 | 0.00 | H |
| ATOM | 179 | H51 | OCT | X | 4 | 26.833 | 16.779 | 35.484 | 1.00 | 0.00 | H |
| ATOM | 180 | H52 | OCT | X | 4 | 23.199 | 14.374 | 35.297 | 1.00 | 0.00 | H |
| ATOM | 181 | H53 | OCT | X | 4 | 23.191 | 18.312 | 36.965 | 1.00 | 0.00 | H |
| ATOM | 182 | H54 | OCT | X | 4 | 27.519 | 25.693 | 35.995 | 1.00 | 0.00 | H |
| ATOM | 183 | H55 | OCT | X | 4 | 23.540 | 24.272 | 37.001 | 1.00 | 0.00 | H |
| ATOM | 184 | H56 | OCT | X | 4 | 24.218 | 28.383 | 36.556 | 1.00 | 0.00 | H |
| ATOM | 185 | C1  | MOL | X | 5 | 20.298 | 21.392 | 32.058 | 1.00 | 0.00 | C |
| ATOM | 186 | C2  | MOL | X | 5 | 19.823 | 21.601 | 33.521 | 1.00 | 0.00 | C |
| ATOM | 187 | C3  | MOL | X | 5 | 19.329 | 20.330 | 34.165 | 1.00 | 0.00 | C |
| ATOM | 188 | C4  | MOL | X | 5 | 18.580 | 20.617 | 35.480 | 1.00 | 0.00 | C |
| ATOM | 189 | C5  | MOL | X | 5 | 19.315 | 21.396 | 36.521 | 1.00 | 0.00 | C |
| ATOM | 190 | C6  | MOL | X | 5 | 18.632 | 21.403 | 37.876 | 1.00 | 0.00 | C |
| ATOM | 191 | N1  | MOL | X | 5 | 19.323 | 22.205 | 39.027 | 1.00 | 0.00 | N |
| ATOM | 192 | C7  | MOL | X | 5 | 19.326 | 23.686 | 38.764 | 1.00 | 0.00 | C |
| ATOM | 193 | C8  | MOL | X | 5 | 20.706 | 21.627 | 39.185 | 1.00 | 0.00 | C |
| ATOM | 194 | C9  | MOL | X | 5 | 18.606 | 21.940 | 40.340 | 1.00 | 0.00 | C |
| ATOM | 195 | H1  | MOL | X | 5 | 20.991 | 20.570 | 31.865 | 1.00 | 0.00 | H |
| ATOM | 196 | H2  | MOL | X | 5 | 19.423 | 21.205 | 31.432 | 1.00 | 0.00 | H |
| ATOM | 197 | H3  | MOL | X | 5 | 19.019 | 22.336 | 33.594 | 1.00 | 0.00 | H |
| ATOM | 198 | H4  | MOL | X | 5 | 20.662 | 22.053 | 34.054 | 1.00 | 0.00 | H |
| ATOM | 199 | H5  | MOL | X | 5 | 20.191 | 19.738 | 34.479 | 1.00 | 0.00 | H |
| ATOM | 200 | H6  | MOL | X | 5 | 18.751 | 19.735 | 33.454 | 1.00 | 0.00 | H |
| ATOM | 201 | H7  | MOL | X | 5 | 18.280 | 19.642 | 35.869 | 1.00 | 0.00 | H |
| ATOM | 202 | H8  | MOL | X | 5 | 17.631 | 21.124 | 35.294 | 1.00 | 0.00 | H |
| ATOM | 203 | H9  | MOL | X | 5 | 19.391 | 22.438 | 36.203 | 1.00 | 0.00 | H |
| ATOM | 204 | H10 | MOL | X | 5 | 20.295 | 20.922 | 36.603 | 1.00 | 0.00 | H |
| ATOM | 205 | H11 | MOL | X | 5 | 18.595 | 20.402 | 38.310 | 1.00 | 0.00 | H |
| ATOM | 206 | H12 | MOL | X | 5 | 17.660 | 21.889 | 37.782 | 1.00 | 0.00 | H |
| ATOM | 207 | H13 | MOL | X | 5 | 20.725 | 22.324 | 31.682 | 1.00 | 0.00 | H |
| ATOM | 208 | H14 | MOL | X | 5 | 18.340 | 24.079 | 38.513 | 1.00 | 0.00 | H |
| ATOM | 209 | H15 | MOL | X | 5 | 19.672 | 24.211 | 39.655 | 1.00 | 0.00 | H |
| ATOM | 210 | H16 | MOL | X | 5 | 19.940 | 23.976 | 37.910 | 1.00 | 0.00 | H |
| ATOM | 211 | H17 | MOL | X | 5 | 20.637 | 20.541 | 39.265 | 1.00 | 0.00 | H |
| ATOM | 212 | H18 | MOL | X | 5 | 21.302 | 21.930 | 38.324 | 1.00 | 0.00 | H |
| ATOM | 213 | H19 | MOL | X | 5 | 21.204 | 22.069 | 40.049 | 1.00 | 0.00 | H |
| ATOM | 214 | H20 | MOL | X | 5 | 17.619 | 22.363 | 40.148 | 1.00 | 0.00 | H |
| ATOM | 215 | H21 | MOL | X | 5 | 18.474 | 20.859 | 40.402 | 1.00 | 0.00 | H |
| ATOM | 216 | H22 | MOL | X | 5 | 19.069 | 22.560 | 41.110 | 1.00 | 0.00 | H |

END

## OAH-G4

|      |    |     |     |   |   |        |        |        |      |      |   |
|------|----|-----|-----|---|---|--------|--------|--------|------|------|---|
| ATOM | 1  | C1  | OCT | X | 4 | 19.992 | 21.071 | 25.480 | 1.00 | 0.00 | C |
| ATOM | 2  | C2  | OCT | X | 4 | 22.139 | 19.875 | 26.898 | 1.00 | 0.00 | C |
| ATOM | 3  | C3  | OCT | X | 4 | 20.567 | 19.928 | 25.044 | 1.00 | 0.00 | C |
| ATOM | 4  | C4  | OCT | X | 4 | 20.507 | 21.603 | 26.720 | 1.00 | 0.00 | C |
| ATOM | 5  | C5  | OCT | X | 4 | 21.640 | 21.120 | 27.303 | 1.00 | 0.00 | C |
| ATOM | 6  | C6  | OCT | X | 4 | 21.565 | 19.230 | 25.764 | 1.00 | 0.00 | C |
| ATOM | 7  | O1  | OCT | X | 4 | 23.149 | 19.264 | 27.516 | 1.00 | 0.00 | O |
| ATOM | 8  | C7  | OCT | X | 4 | 22.214 | 17.944 | 25.210 | 1.00 | 0.00 | C |
| ATOM | 9  | C8  | OCT | X | 4 | 22.720 | 18.236 | 28.431 | 1.00 | 0.00 | C |
| ATOM | 10 | O2  | OCT | X | 4 | 23.061 | 16.944 | 27.902 | 1.00 | 0.00 | O |
| ATOM | 11 | C9  | OCT | X | 4 | 22.118 | 16.274 | 27.142 | 1.00 | 0.00 | C |
| ATOM | 12 | C10 | OCT | X | 4 | 21.624 | 16.703 | 25.911 | 1.00 | 0.00 | C |
| ATOM | 13 | C11 | OCT | X | 4 | 20.439 | 16.210 | 25.434 | 1.00 | 0.00 | C |
| ATOM | 14 | C12 | OCT | X | 4 | 21.509 | 15.235 | 27.769 | 1.00 | 0.00 | C |
| ATOM | 15 | C13 | OCT | X | 4 | 19.694 | 15.161 | 26.083 | 1.00 | 0.00 | C |

|      |    |     |     |   |   |        |        |        |      |      |   |
|------|----|-----|-----|---|---|--------|--------|--------|------|------|---|
| ATOM | 16 | C14 | OCT | X | 4 | 20.314 | 14.677 | 27.266 | 1.00 | 0.00 | C |
| ATOM | 17 | O3  | OCT | X | 4 | 19.520 | 13.950 | 28.183 | 1.00 | 0.00 | O |
| ATOM | 18 | C15 | OCT | X | 4 | 18.466 | 14.601 | 25.460 | 1.00 | 0.00 | C |
| ATOM | 19 | C16 | OCT | X | 4 | 17.268 | 15.393 | 26.016 | 1.00 | 0.00 | C |
| ATOM | 20 | C17 | OCT | X | 4 | 16.594 | 14.930 | 27.166 | 1.00 | 0.00 | C |
| ATOM | 21 | C18 | OCT | X | 4 | 18.248 | 14.393 | 28.784 | 1.00 | 0.00 | C |
| ATOM | 22 | O4  | OCT | X | 4 | 17.162 | 13.975 | 27.988 | 1.00 | 0.00 | O |
| ATOM | 23 | O5  | OCT | X | 4 | 19.928 | 22.766 | 27.235 | 1.00 | 0.00 | O |
| ATOM | 24 | C19 | OCT | X | 4 | 18.738 | 21.688 | 24.799 | 1.00 | 0.00 | C |
| ATOM | 25 | C20 | OCT | X | 4 | 17.399 | 21.249 | 25.391 | 1.00 | 0.00 | C |
| ATOM | 26 | O6  | OCT | X | 4 | 17.555 | 22.987 | 27.105 | 1.00 | 0.00 | O |
| ATOM | 27 | C21 | OCT | X | 4 | 16.906 | 21.979 | 26.522 | 1.00 | 0.00 | C |
| ATOM | 28 | C22 | OCT | X | 4 | 15.464 | 15.632 | 27.605 | 1.00 | 0.00 | C |
| ATOM | 29 | C23 | OCT | X | 4 | 15.038 | 16.757 | 26.995 | 1.00 | 0.00 | C |
| ATOM | 30 | C24 | OCT | X | 4 | 15.676 | 21.556 | 27.096 | 1.00 | 0.00 | C |
| ATOM | 31 | C25 | OCT | X | 4 | 15.014 | 20.370 | 26.633 | 1.00 | 0.00 | C |
| ATOM | 32 | O7  | OCT | X | 4 | 13.941 | 17.383 | 27.601 | 1.00 | 0.00 | O |
| ATOM | 33 | O8  | OCT | X | 4 | 13.934 | 19.839 | 27.399 | 1.00 | 0.00 | O |
| ATOM | 34 | C26 | OCT | X | 4 | 14.138 | 18.732 | 28.302 | 1.00 | 0.00 | C |
| ATOM | 35 | C27 | OCT | X | 4 | 16.785 | 20.123 | 24.939 | 1.00 | 0.00 | C |
| ATOM | 36 | C28 | OCT | X | 4 | 15.581 | 19.653 | 25.589 | 1.00 | 0.00 | C |
| ATOM | 37 | C29 | OCT | X | 4 | 16.695 | 16.417 | 25.264 | 1.00 | 0.00 | C |
| ATOM | 38 | C30 | OCT | X | 4 | 14.985 | 18.327 | 25.008 | 1.00 | 0.00 | C |
| ATOM | 39 | C31 | OCT | X | 4 | 15.651 | 17.199 | 25.822 | 1.00 | 0.00 | C |
| ATOM | 40 | C32 | OCT | X | 4 | 18.733 | 22.627 | 27.932 | 1.00 | 0.00 | C |
| ATOM | 41 | C33 | OCT | X | 4 | 18.577 | 14.317 | 23.957 | 1.00 | 0.00 | C |
| ATOM | 42 | C34 | OCT | X | 4 | 17.308 | 13.601 | 23.487 | 1.00 | 0.00 | C |
| ATOM | 43 | C35 | OCT | X | 4 | 17.450 | 13.281 | 22.010 | 1.00 | 0.00 | C |
| ATOM | 44 | O9  | OCT | X | 4 | 16.575 | 13.507 | 21.212 | 1.00 | 0.00 | O |
| ATOM | 45 | C36 | OCT | X | 4 | 22.468 | 17.962 | 23.777 | 1.00 | 0.00 | C |
| ATOM | 46 | C37 | OCT | X | 4 | 23.376 | 16.779 | 23.285 | 1.00 | 0.00 | C |
| ATOM | 47 | C38 | OCT | X | 4 | 23.548 | 17.014 | 21.776 | 1.00 | 0.00 | C |
| ATOM | 48 | O10 | OCT | X | 4 | 24.455 | 17.726 | 21.401 | 1.00 | 0.00 | O |
| ATOM | 49 | C39 | OCT | X | 4 | 18.884 | 21.575 | 23.227 | 1.00 | 0.00 | C |
| ATOM | 50 | C40 | OCT | X | 4 | 17.887 | 22.503 | 22.516 | 1.00 | 0.00 | C |
| ATOM | 51 | C41 | OCT | X | 4 | 18.181 | 22.695 | 21.049 | 1.00 | 0.00 | C |
| ATOM | 52 | O11 | OCT | X | 4 | 17.939 | 21.739 | 20.338 | 1.00 | 0.00 | O |
| ATOM | 53 | C42 | OCT | X | 4 | 14.730 | 18.156 | 23.497 | 1.00 | 0.00 | C |
| ATOM | 54 | C43 | OCT | X | 4 | 13.855 | 19.325 | 22.922 | 1.00 | 0.00 | C |
| ATOM | 55 | C44 | OCT | X | 4 | 13.806 | 19.191 | 21.423 | 1.00 | 0.00 | C |
| ATOM | 56 | O12 | OCT | X | 4 | 14.229 | 20.068 | 20.692 | 1.00 | 0.00 | O |
| ATOM | 57 | C45 | OCT | X | 4 | 23.418 | 18.449 | 29.720 | 1.00 | 0.00 | C |
| ATOM | 58 | C46 | OCT | X | 4 | 24.057 | 18.606 | 32.514 | 1.00 | 0.00 | C |
| ATOM | 59 | C47 | OCT | X | 4 | 23.566 | 17.311 | 30.547 | 1.00 | 0.00 | C |
| ATOM | 60 | C48 | OCT | X | 4 | 23.667 | 19.683 | 30.359 | 1.00 | 0.00 | C |
| ATOM | 61 | C49 | OCT | X | 4 | 23.939 | 19.757 | 31.733 | 1.00 | 0.00 | C |
| ATOM | 62 | C50 | OCT | X | 4 | 23.867 | 17.365 | 31.904 | 1.00 | 0.00 | C |
| ATOM | 63 | C51 | OCT | X | 4 | 18.700 | 23.371 | 29.239 | 1.00 | 0.00 | C |
| ATOM | 64 | C52 | OCT | X | 4 | 18.625 | 24.655 | 31.766 | 1.00 | 0.00 | C |
| ATOM | 65 | C53 | OCT | X | 4 | 17.498 | 23.660 | 29.859 | 1.00 | 0.00 | C |
| ATOM | 66 | C54 | OCT | X | 4 | 19.915 | 23.614 | 29.971 | 1.00 | 0.00 | C |
| ATOM | 67 | C55 | OCT | X | 4 | 19.846 | 24.298 | 31.203 | 1.00 | 0.00 | C |
| ATOM | 68 | C56 | OCT | X | 4 | 17.466 | 24.253 | 31.128 | 1.00 | 0.00 | C |
| ATOM | 69 | C57 | OCT | X | 4 | 13.354 | 18.908 | 29.624 | 1.00 | 0.00 | C |
| ATOM | 70 | C58 | OCT | X | 4 | 12.339 | 19.228 | 32.151 | 1.00 | 0.00 | C |
| ATOM | 71 | C59 | OCT | X | 4 | 13.266 | 17.789 | 30.481 | 1.00 | 0.00 | C |
| ATOM | 72 | C60 | OCT | X | 4 | 12.996 | 20.161 | 30.046 | 1.00 | 0.00 | C |
| ATOM | 73 | C61 | OCT | X | 4 | 12.524 | 20.306 | 31.296 | 1.00 | 0.00 | C |
| ATOM | 74 | C62 | OCT | X | 4 | 12.683 | 17.953 | 31.730 | 1.00 | 0.00 | C |
| ATOM | 75 | C63 | OCT | X | 4 | 18.048 | 13.783 | 30.159 | 1.00 | 0.00 | C |

|      |     |     |     |   |   |        |        |        |      |      |   |
|------|-----|-----|-----|---|---|--------|--------|--------|------|------|---|
| ATOM | 76  | C64 | OCT | X | 4 | 17.772 | 13.061 | 32.871 | 1.00 | 0.00 | C |
| ATOM | 77  | C65 | OCT | X | 4 | 16.794 | 13.538 | 30.693 | 1.00 | 0.00 | C |
| ATOM | 78  | C66 | OCT | X | 4 | 19.187 | 13.688 | 30.989 | 1.00 | 0.00 | C |
| ATOM | 79  | C67 | OCT | X | 4 | 19.065 | 13.245 | 32.317 | 1.00 | 0.00 | C |
| ATOM | 80  | C68 | OCT | X | 4 | 16.651 | 13.272 | 32.089 | 1.00 | 0.00 | C |
| ATOM | 81  | O13 | OCT | X | 4 | 20.973 | 24.572 | 31.886 | 1.00 | 0.00 | O |
| ATOM | 82  | O14 | OCT | X | 4 | 12.357 | 21.575 | 31.940 | 1.00 | 0.00 | O |
| ATOM | 83  | O15 | OCT | X | 4 | 12.564 | 16.911 | 32.621 | 1.00 | 0.00 | O |
| ATOM | 84  | O16 | OCT | X | 4 | 24.045 | 20.993 | 32.373 | 1.00 | 0.00 | O |
| ATOM | 85  | O17 | OCT | X | 4 | 23.911 | 16.241 | 32.705 | 1.00 | 0.00 | O |
| ATOM | 86  | O18 | OCT | X | 4 | 15.445 | 13.135 | 32.646 | 1.00 | 0.00 | O |
| ATOM | 87  | O19 | OCT | X | 4 | 20.167 | 13.174 | 33.112 | 1.00 | 0.00 | O |
| ATOM | 88  | C69 | OCT | X | 4 | 13.073 | 22.781 | 31.568 | 1.00 | 0.00 | C |
| ATOM | 89  | C70 | OCT | X | 4 | 14.271 | 25.130 | 30.764 | 1.00 | 0.00 | C |
| ATOM | 90  | C71 | OCT | X | 4 | 14.427 | 23.033 | 31.839 | 1.00 | 0.00 | C |
| ATOM | 91  | C72 | OCT | X | 4 | 12.336 | 23.692 | 30.854 | 1.00 | 0.00 | C |
| ATOM | 92  | C73 | OCT | X | 4 | 12.948 | 24.874 | 30.400 | 1.00 | 0.00 | C |
| ATOM | 93  | C74 | OCT | X | 4 | 14.991 | 24.223 | 31.488 | 1.00 | 0.00 | C |
| ATOM | 94  | O20 | OCT | X | 4 | 16.336 | 24.472 | 31.817 | 1.00 | 0.00 | O |
| ATOM | 95  | C75 | OCT | X | 4 | 23.650 | 22.200 | 31.828 | 1.00 | 0.00 | C |
| ATOM | 96  | C76 | OCT | X | 4 | 22.940 | 24.585 | 30.652 | 1.00 | 0.00 | C |
| ATOM | 97  | C77 | OCT | X | 4 | 24.524 | 22.791 | 31.022 | 1.00 | 0.00 | C |
| ATOM | 98  | C78 | OCT | X | 4 | 22.482 | 22.830 | 32.261 | 1.00 | 0.00 | C |
| ATOM | 99  | C79 | OCT | X | 4 | 22.170 | 24.048 | 31.663 | 1.00 | 0.00 | C |
| ATOM | 100 | C80 | OCT | X | 4 | 24.189 | 24.012 | 30.347 | 1.00 | 0.00 | C |
| ATOM | 101 | C81 | OCT | X | 4 | 12.891 | 15.639 | 32.321 | 1.00 | 0.00 | C |
| ATOM | 102 | C82 | OCT | X | 4 | 13.320 | 13.017 | 31.612 | 1.00 | 0.00 | C |
| ATOM | 103 | C83 | OCT | X | 4 | 11.874 | 14.942 | 31.668 | 1.00 | 0.00 | C |
| ATOM | 104 | C84 | OCT | X | 4 | 14.141 | 15.073 | 32.601 | 1.00 | 0.00 | C |
| ATOM | 105 | C85 | OCT | X | 4 | 14.299 | 13.710 | 32.291 | 1.00 | 0.00 | C |
| ATOM | 106 | C86 | OCT | X | 4 | 12.124 | 13.594 | 31.294 | 1.00 | 0.00 | C |
| ATOM | 107 | C87 | OCT | X | 4 | 11.171 | 12.925 | 30.401 | 1.00 | 0.00 | C |
| ATOM | 108 | O21 | OCT | X | 4 | 11.221 | 11.649 | 30.399 | 1.00 | 0.00 | O |
| ATOM | 109 | C88 | OCT | X | 4 | 23.817 | 12.046 | 30.073 | 1.00 | 0.00 | C |
| ATOM | 110 | O22 | OCT | X | 4 | 24.916 | 12.294 | 29.672 | 1.00 | 0.00 | O |
| ATOM | 111 | C89 | OCT | X | 4 | 25.110 | 24.582 | 29.305 | 1.00 | 0.00 | C |
| ATOM | 112 | O23 | OCT | X | 4 | 25.144 | 25.798 | 29.118 | 1.00 | 0.00 | O |
| ATOM | 113 | O24 | OCT | X | 4 | 18.450 | 12.860 | 21.529 | 1.00 | 0.00 | O |
| ATOM | 114 | O25 | OCT | X | 4 | 13.391 | 18.175 | 20.880 | 1.00 | 0.00 | O |
| ATOM | 115 | O26 | OCT | X | 4 | 18.399 | 23.838 | 20.560 | 1.00 | 0.00 | O |
| ATOM | 116 | C90 | OCT | X | 4 | 12.211 | 25.968 | 29.680 | 1.00 | 0.00 | C |
| ATOM | 117 | O27 | OCT | X | 4 | 12.678 | 27.061 | 29.562 | 1.00 | 0.00 | O |
| ATOM | 118 | O28 | OCT | X | 4 | 23.148 | 11.132 | 29.534 | 1.00 | 0.00 | O |
| ATOM | 119 | O29 | OCT | X | 4 | 10.232 | 13.424 | 29.875 | 1.00 | 0.00 | O |
| ATOM | 120 | O30 | OCT | X | 4 | 11.083 | 25.851 | 29.212 | 1.00 | 0.00 | O |
| ATOM | 121 | O31 | OCT | X | 4 | 26.055 | 23.911 | 28.903 | 1.00 | 0.00 | O |
| ATOM | 122 | O32 | OCT | X | 4 | 22.837 | 16.336 | 21.034 | 1.00 | 0.00 | O |
| ATOM | 123 | C91 | OCT | X | 4 | 23.332 | 15.000 | 32.393 | 1.00 | 0.00 | C |
| ATOM | 124 | C92 | OCT | X | 4 | 22.002 | 12.659 | 31.716 | 1.00 | 0.00 | C |
| ATOM | 125 | C93 | OCT | X | 4 | 22.073 | 14.672 | 32.964 | 1.00 | 0.00 | C |
| ATOM | 126 | C94 | OCT | X | 4 | 23.848 | 14.119 | 31.414 | 1.00 | 0.00 | C |
| ATOM | 127 | C95 | OCT | X | 4 | 23.183 | 12.955 | 31.063 | 1.00 | 0.00 | C |
| ATOM | 128 | C96 | OCT | X | 4 | 21.394 | 13.537 | 32.635 | 1.00 | 0.00 | C |
| ATOM | 129 | H1  | OCT | X | 4 | 20.177 | 19.385 | 24.186 | 1.00 | 0.00 | H |
| ATOM | 130 | H2  | OCT | X | 4 | 21.995 | 21.675 | 28.167 | 1.00 | 0.00 | H |
| ATOM | 131 | H3  | OCT | X | 4 | 23.191 | 17.817 | 25.681 | 1.00 | 0.00 | H |
| ATOM | 132 | H4  | OCT | X | 4 | 21.657 | 18.382 | 28.675 | 1.00 | 0.00 | H |
| ATOM | 133 | H5  | OCT | X | 4 | 19.996 | 16.619 | 24.530 | 1.00 | 0.00 | H |
| ATOM | 134 | H6  | OCT | X | 4 | 21.847 | 15.144 | 28.798 | 1.00 | 0.00 | H |
| ATOM | 135 | H7  | OCT | X | 4 | 18.373 | 13.590 | 25.862 | 1.00 | 0.00 | H |

|      |     |     |     |   |   |        |        |        |      |      |   |
|------|-----|-----|-----|---|---|--------|--------|--------|------|------|---|
| ATOM | 136 | H8  | OCT | X | 4 | 18.192 | 15.480 | 28.938 | 1.00 | 0.00 | H |
| ATOM | 137 | H9  | OCT | X | 4 | 18.831 | 22.758 | 24.995 | 1.00 | 0.00 | H |
| ATOM | 138 | H10 | OCT | X | 4 | 14.949 | 15.220 | 28.469 | 1.00 | 0.00 | H |
| ATOM | 139 | H11 | OCT | X | 4 | 15.213 | 22.178 | 27.858 | 1.00 | 0.00 | H |
| ATOM | 140 | H12 | OCT | X | 4 | 15.181 | 18.821 | 28.642 | 1.00 | 0.00 | H |
| ATOM | 141 | H13 | OCT | X | 4 | 17.152 | 19.570 | 24.078 | 1.00 | 0.00 | H |
| ATOM | 142 | H14 | OCT | X | 4 | 17.150 | 16.730 | 24.328 | 1.00 | 0.00 | H |
| ATOM | 143 | H15 | OCT | X | 4 | 13.944 | 18.200 | 25.311 | 1.00 | 0.00 | H |
| ATOM | 144 | H16 | OCT | X | 4 | 18.642 | 21.572 | 28.230 | 1.00 | 0.00 | H |
| ATOM | 145 | H17 | OCT | X | 4 | 18.743 | 15.187 | 23.318 | 1.00 | 0.00 | H |
| ATOM | 146 | H18 | OCT | X | 4 | 19.385 | 13.585 | 23.887 | 1.00 | 0.00 | H |
| ATOM | 147 | H19 | OCT | X | 4 | 17.105 | 12.646 | 23.976 | 1.00 | 0.00 | H |
| ATOM | 148 | H20 | OCT | X | 4 | 16.435 | 14.254 | 23.536 | 1.00 | 0.00 | H |
| ATOM | 149 | H21 | OCT | X | 4 | 23.014 | 18.905 | 23.701 | 1.00 | 0.00 | H |
| ATOM | 150 | H22 | OCT | X | 4 | 21.597 | 18.115 | 23.136 | 1.00 | 0.00 | H |
| ATOM | 151 | H23 | OCT | X | 4 | 24.299 | 16.863 | 23.863 | 1.00 | 0.00 | H |
| ATOM | 152 | H24 | OCT | X | 4 | 22.954 | 15.796 | 23.502 | 1.00 | 0.00 | H |
| ATOM | 153 | H25 | OCT | X | 4 | 19.896 | 21.864 | 22.934 | 1.00 | 0.00 | H |
| ATOM | 154 | H26 | OCT | X | 4 | 18.794 | 20.552 | 22.856 | 1.00 | 0.00 | H |
| ATOM | 155 | H27 | OCT | X | 4 | 16.926 | 21.996 | 22.621 | 1.00 | 0.00 | H |
| ATOM | 156 | H28 | OCT | X | 4 | 17.870 | 23.458 | 23.046 | 1.00 | 0.00 | H |
| ATOM | 157 | H29 | OCT | X | 4 | 15.692 | 18.230 | 22.986 | 1.00 | 0.00 | H |
| ATOM | 158 | H30 | OCT | X | 4 | 14.296 | 17.219 | 23.142 | 1.00 | 0.00 | H |
| ATOM | 159 | H31 | OCT | X | 4 | 12.837 | 19.232 | 23.303 | 1.00 | 0.00 | H |
| ATOM | 160 | H32 | OCT | X | 4 | 14.262 | 20.322 | 23.106 | 1.00 | 0.00 | H |
| ATOM | 161 | H33 | OCT | X | 4 | 24.291 | 18.602 | 33.575 | 1.00 | 0.00 | H |
| ATOM | 162 | H34 | OCT | X | 4 | 23.426 | 16.300 | 30.174 | 1.00 | 0.00 | H |
| ATOM | 163 | H35 | OCT | X | 4 | 23.626 | 20.649 | 29.863 | 1.00 | 0.00 | H |
| ATOM | 164 | H36 | OCT | X | 4 | 18.641 | 24.895 | 32.827 | 1.00 | 0.00 | H |
| ATOM | 165 | H37 | OCT | X | 4 | 16.519 | 23.375 | 29.484 | 1.00 | 0.00 | H |
| ATOM | 166 | H38 | OCT | X | 4 | 20.874 | 23.351 | 29.532 | 1.00 | 0.00 | H |
| ATOM | 167 | H39 | OCT | X | 4 | 12.070 | 19.371 | 33.194 | 1.00 | 0.00 | H |
| ATOM | 168 | H40 | OCT | X | 4 | 13.575 | 16.829 | 30.076 | 1.00 | 0.00 | H |
| ATOM | 169 | H41 | OCT | X | 4 | 13.172 | 21.122 | 29.568 | 1.00 | 0.00 | H |
| ATOM | 170 | H42 | OCT | X | 4 | 17.608 | 12.865 | 33.928 | 1.00 | 0.00 | H |
| ATOM | 171 | H43 | OCT | X | 4 | 15.908 | 13.741 | 30.098 | 1.00 | 0.00 | H |
| ATOM | 172 | H44 | OCT | X | 4 | 20.180 | 14.010 | 30.688 | 1.00 | 0.00 | H |
| ATOM | 173 | H45 | OCT | X | 4 | 14.682 | 26.090 | 30.462 | 1.00 | 0.00 | H |
| ATOM | 174 | H46 | OCT | X | 4 | 14.998 | 22.411 | 32.523 | 1.00 | 0.00 | H |
| ATOM | 175 | H47 | OCT | X | 4 | 11.277 | 23.588 | 30.634 | 1.00 | 0.00 | H |
| ATOM | 176 | H48 | OCT | X | 4 | 22.681 | 25.454 | 30.052 | 1.00 | 0.00 | H |
| ATOM | 177 | H49 | OCT | X | 4 | 25.455 | 22.290 | 30.769 | 1.00 | 0.00 | H |
| ATOM | 178 | H50 | OCT | X | 4 | 21.888 | 22.453 | 33.090 | 1.00 | 0.00 | H |
| ATOM | 179 | H51 | OCT | X | 4 | 13.462 | 11.967 | 31.372 | 1.00 | 0.00 | H |
| ATOM | 180 | H52 | OCT | X | 4 | 10.928 | 15.436 | 31.463 | 1.00 | 0.00 | H |
| ATOM | 181 | H53 | OCT | X | 4 | 14.877 | 15.563 | 33.233 | 1.00 | 0.00 | H |
| ATOM | 182 | H54 | OCT | X | 4 | 21.365 | 11.797 | 31.534 | 1.00 | 0.00 | H |
| ATOM | 183 | H55 | OCT | X | 4 | 21.641 | 15.469 | 33.563 | 1.00 | 0.00 | H |
| ATOM | 184 | H56 | OCT | X | 4 | 24.846 | 14.239 | 31.000 | 1.00 | 0.00 | H |
| ATOM | 185 | C1  | MOL | X | 5 | 18.980 | 17.011 | 31.984 | 1.00 | 0.00 | C |
| ATOM | 186 | C2  | MOL | X | 5 | 20.031 | 17.958 | 32.694 | 1.00 | 0.00 | C |
| ATOM | 187 | C3  | MOL | X | 5 | 17.813 | 17.989 | 31.622 | 1.00 | 0.00 | C |
| ATOM | 188 | C4  | MOL | X | 5 | 17.232 | 18.508 | 32.940 | 1.00 | 0.00 | C |
| ATOM | 189 | C5  | MOL | X | 5 | 19.482 | 18.605 | 33.988 | 1.00 | 0.00 | C |
| ATOM | 190 | C6  | MOL | X | 5 | 18.217 | 19.482 | 33.603 | 1.00 | 0.00 | C |
| ATOM | 191 | C7  | MOL | X | 5 | 18.656 | 20.591 | 32.564 | 1.00 | 0.00 | C |
| ATOM | 192 | C8  | MOL | X | 5 | 20.567 | 19.061 | 31.764 | 1.00 | 0.00 | C |
| ATOM | 193 | C9  | MOL | X | 5 | 18.334 | 19.110 | 30.627 | 1.00 | 0.00 | C |
| ATOM | 194 | C10 | MOL | X | 5 | 19.380 | 19.994 | 31.306 | 1.00 | 0.00 | C |
| ATOM | 195 | C11 | MOL | X | 5 | 17.683 | 20.127 | 34.842 | 1.00 | 0.00 | C |



|      |     |     |     |   |   |        |        |        |      |      |    |
|------|-----|-----|-----|---|---|--------|--------|--------|------|------|----|
| ATOM | 196 | O1  | MOL | X | 5 | 16.821 | 19.573 | 35.517 | 1.00 | 0.00 | O  |
| ATOM | 197 | O2  | MOL | X | 5 | 18.210 | 21.109 | 35.271 | 1.00 | 0.00 | O  |
| ATOM | 198 | Br1 | MOL | X | 5 | 16.838 | 20.116 | 29.817 | 1.00 | 0.00 | BR |
| ATOM | 199 | H1  | MOL | X | 5 | 18.661 | 16.139 | 32.558 | 1.00 | 0.00 | H  |
| ATOM | 200 | H2  | MOL | X | 5 | 19.450 | 16.549 | 31.114 | 1.00 | 0.00 | H  |
| ATOM | 201 | H3  | MOL | X | 5 | 20.889 | 17.347 | 32.984 | 1.00 | 0.00 | H  |
| ATOM | 202 | H4  | MOL | X | 5 | 16.971 | 17.476 | 31.153 | 1.00 | 0.00 | H  |
| ATOM | 203 | H5  | MOL | X | 5 | 16.873 | 17.672 | 33.546 | 1.00 | 0.00 | H  |
| ATOM | 204 | H6  | MOL | X | 5 | 16.334 | 19.077 | 32.689 | 1.00 | 0.00 | H  |
| ATOM | 205 | H7  | MOL | X | 5 | 20.272 | 19.157 | 34.502 | 1.00 | 0.00 | H  |
| ATOM | 206 | H8  | MOL | X | 5 | 19.193 | 17.810 | 34.680 | 1.00 | 0.00 | H  |
| ATOM | 207 | H9  | MOL | X | 5 | 17.799 | 21.213 | 32.296 | 1.00 | 0.00 | H  |
| ATOM | 208 | H10 | MOL | X | 5 | 19.337 | 21.306 | 33.031 | 1.00 | 0.00 | H  |
| ATOM | 209 | H11 | MOL | X | 5 | 21.038 | 18.617 | 30.885 | 1.00 | 0.00 | H  |
| ATOM | 210 | H12 | MOL | X | 5 | 21.381 | 19.633 | 32.215 | 1.00 | 0.00 | H  |
| ATOM | 211 | H13 | MOL | X | 5 | 18.791 | 18.674 | 29.735 | 1.00 | 0.00 | H  |
| ATOM | 212 | H14 | MOL | X | 5 | 19.739 | 20.719 | 30.573 | 1.00 | 0.00 | H  |
| END  |     |     |     |   |   |        |        |        |      |      |    |

### OAH-G5

|      |    |     |     |   |   |        |        |        |      |      |   |
|------|----|-----|-----|---|---|--------|--------|--------|------|------|---|
| ATOM | 1  | C1  | OCT | X | 4 | 21.441 | 24.515 | 30.050 | 1.00 | 0.00 | C |
| ATOM | 2  | C2  | OCT | X | 4 | 23.564 | 23.153 | 31.210 | 1.00 | 0.00 | C |
| ATOM | 3  | C3  | OCT | X | 4 | 22.079 | 23.419 | 29.446 | 1.00 | 0.00 | C |
| ATOM | 4  | C4  | OCT | X | 4 | 21.922 | 24.845 | 31.310 | 1.00 | 0.00 | C |
| ATOM | 5  | C5  | OCT | X | 4 | 22.909 | 24.154 | 31.938 | 1.00 | 0.00 | C |
| ATOM | 6  | C6  | OCT | X | 4 | 23.076 | 22.709 | 30.001 | 1.00 | 0.00 | C |
| ATOM | 7  | O1  | OCT | X | 4 | 24.556 | 22.443 | 31.866 | 1.00 | 0.00 | O |
| ATOM | 8  | C7  | OCT | X | 4 | 23.657 | 21.439 | 29.405 | 1.00 | 0.00 | C |
| ATOM | 9  | C8  | OCT | X | 4 | 24.173 | 21.233 | 32.624 | 1.00 | 0.00 | C |
| ATOM | 10 | O2  | OCT | X | 4 | 24.431 | 20.044 | 31.923 | 1.00 | 0.00 | O |
| ATOM | 11 | C9  | OCT | X | 4 | 23.454 | 19.619 | 31.107 | 1.00 | 0.00 | C |
| ATOM | 12 | C10 | OCT | X | 4 | 22.927 | 20.246 | 29.947 | 1.00 | 0.00 | C |
| ATOM | 13 | C11 | OCT | X | 4 | 21.758 | 19.702 | 29.358 | 1.00 | 0.00 | C |
| ATOM | 14 | C12 | OCT | X | 4 | 22.707 | 18.594 | 31.711 | 1.00 | 0.00 | C |
| ATOM | 15 | C13 | OCT | X | 4 | 21.059 | 18.702 | 29.957 | 1.00 | 0.00 | C |
| ATOM | 16 | C14 | OCT | X | 4 | 21.501 | 18.104 | 31.125 | 1.00 | 0.00 | C |
| ATOM | 17 | O3  | OCT | X | 4 | 20.774 | 17.162 | 31.823 | 1.00 | 0.00 | O |
| ATOM | 18 | C15 | OCT | X | 4 | 19.861 | 18.084 | 29.275 | 1.00 | 0.00 | C |
| ATOM | 19 | C16 | OCT | X | 4 | 18.608 | 18.799 | 29.783 | 1.00 | 0.00 | C |
| ATOM | 20 | C17 | OCT | X | 4 | 18.001 | 18.436 | 31.011 | 1.00 | 0.00 | C |
| ATOM | 21 | C18 | OCT | X | 4 | 19.644 | 17.638 | 32.507 | 1.00 | 0.00 | C |
| ATOM | 22 | O4  | OCT | X | 4 | 18.457 | 17.361 | 31.751 | 1.00 | 0.00 | O |
| ATOM | 23 | O5  | OCT | X | 4 | 21.418 | 25.909 | 31.981 | 1.00 | 0.00 | O |
| ATOM | 24 | C19 | OCT | X | 4 | 20.329 | 25.254 | 29.247 | 1.00 | 0.00 | C |
| ATOM | 25 | C20 | OCT | X | 4 | 18.934 | 24.729 | 29.671 | 1.00 | 0.00 | C |
| ATOM | 26 | O6  | OCT | X | 4 | 19.122 | 26.255 | 31.537 | 1.00 | 0.00 | O |
| ATOM | 27 | C21 | OCT | X | 4 | 18.426 | 25.288 | 30.799 | 1.00 | 0.00 | C |
| ATOM | 28 | C22 | OCT | X | 4 | 16.844 | 19.094 | 31.479 | 1.00 | 0.00 | C |
| ATOM | 29 | C23 | OCT | X | 4 | 16.377 | 20.172 | 30.786 | 1.00 | 0.00 | C |
| ATOM | 30 | C24 | OCT | X | 4 | 17.262 | 24.818 | 31.341 | 1.00 | 0.00 | C |
| ATOM | 31 | C25 | OCT | X | 4 | 16.629 | 23.760 | 30.729 | 1.00 | 0.00 | C |
| ATOM | 32 | O7  | OCT | X | 4 | 15.316 | 20.896 | 31.314 | 1.00 | 0.00 | O |
| ATOM | 33 | O8  | OCT | X | 4 | 15.502 | 23.218 | 31.312 | 1.00 | 0.00 | O |
| ATOM | 34 | C26 | OCT | X | 4 | 15.742 | 22.031 | 32.111 | 1.00 | 0.00 | C |
| ATOM | 35 | C27 | OCT | X | 4 | 18.339 | 23.585 | 29.072 | 1.00 | 0.00 | C |
| ATOM | 36 | C28 | OCT | X | 4 | 17.176 | 23.133 | 29.582 | 1.00 | 0.00 | C |
| ATOM | 37 | C29 | OCT | X | 4 | 18.187 | 19.932 | 29.102 | 1.00 | 0.00 | C |

|      |    |     |     |   |   |        |        |        |      |      |   |
|------|----|-----|-----|---|---|--------|--------|--------|------|------|---|
| ATOM | 38 | C30 | OCT | X | 4 | 16.523 | 21.876 | 28.911 | 1.00 | 0.00 | C |
| ATOM | 39 | C31 | OCT | X | 4 | 17.041 | 20.589 | 29.572 | 1.00 | 0.00 | C |
| ATOM | 40 | C32 | OCT | X | 4 | 20.096 | 25.800 | 32.529 | 1.00 | 0.00 | C |
| ATOM | 41 | C33 | OCT | X | 4 | 19.775 | 17.972 | 27.668 | 1.00 | 0.00 | C |
| ATOM | 42 | C34 | OCT | X | 4 | 20.444 | 16.671 | 27.134 | 1.00 | 0.00 | C |
| ATOM | 43 | C35 | OCT | X | 4 | 20.288 | 16.549 | 25.620 | 1.00 | 0.00 | C |
| ATOM | 44 | O9  | OCT | X | 4 | 21.210 | 16.881 | 24.903 | 1.00 | 0.00 | O |
| ATOM | 45 | C36 | OCT | X | 4 | 23.802 | 21.497 | 27.849 | 1.00 | 0.00 | C |
| ATOM | 46 | C37 | OCT | X | 4 | 24.848 | 22.533 | 27.406 | 1.00 | 0.00 | C |
| ATOM | 47 | C38 | OCT | X | 4 | 25.081 | 22.348 | 25.872 | 1.00 | 0.00 | C |
| ATOM | 48 | O10 | OCT | X | 4 | 25.810 | 21.509 | 25.370 | 1.00 | 0.00 | O |
| ATOM | 49 | C39 | OCT | X | 4 | 20.571 | 25.387 | 27.718 | 1.00 | 0.00 | C |
| ATOM | 50 | C40 | OCT | X | 4 | 19.777 | 26.536 | 27.178 | 1.00 | 0.00 | C |
| ATOM | 51 | C41 | OCT | X | 4 | 19.778 | 26.523 | 25.650 | 1.00 | 0.00 | C |
| ATOM | 52 | O11 | OCT | X | 4 | 20.792 | 26.257 | 25.059 | 1.00 | 0.00 | O |
| ATOM | 53 | C42 | OCT | X | 4 | 16.587 | 21.811 | 27.381 | 1.00 | 0.00 | C |
| ATOM | 54 | C43 | OCT | X | 4 | 15.451 | 22.605 | 26.738 | 1.00 | 0.00 | C |
| ATOM | 55 | C44 | OCT | X | 4 | 15.647 | 22.350 | 25.288 | 1.00 | 0.00 | C |
| ATOM | 56 | O12 | OCT | X | 4 | 16.083 | 23.283 | 24.706 | 1.00 | 0.00 | O |
| ATOM | 57 | C45 | OCT | X | 4 | 24.748 | 21.171 | 34.011 | 1.00 | 0.00 | C |
| ATOM | 58 | C46 | OCT | X | 4 | 25.316 | 21.119 | 36.765 | 1.00 | 0.00 | C |
| ATOM | 59 | C47 | OCT | X | 4 | 24.869 | 19.926 | 34.668 | 1.00 | 0.00 | C |
| ATOM | 60 | C48 | OCT | X | 4 | 24.877 | 22.400 | 34.726 | 1.00 | 0.00 | C |
| ATOM | 61 | C49 | OCT | X | 4 | 25.138 | 22.357 | 36.077 | 1.00 | 0.00 | C |
| ATOM | 62 | C50 | OCT | X | 4 | 25.135 | 19.941 | 36.083 | 1.00 | 0.00 | C |
| ATOM | 63 | C51 | OCT | X | 4 | 20.014 | 26.565 | 33.831 | 1.00 | 0.00 | C |
| ATOM | 64 | C52 | OCT | X | 4 | 19.716 | 27.385 | 36.481 | 1.00 | 0.00 | C |
| ATOM | 65 | C53 | OCT | X | 4 | 18.716 | 26.888 | 34.296 | 1.00 | 0.00 | C |
| ATOM | 66 | C54 | OCT | X | 4 | 21.116 | 26.548 | 34.689 | 1.00 | 0.00 | C |
| ATOM | 67 | C55 | OCT | X | 4 | 20.953 | 26.988 | 35.989 | 1.00 | 0.00 | C |
| ATOM | 68 | C56 | OCT | X | 4 | 18.601 | 27.314 | 35.596 | 1.00 | 0.00 | C |
| ATOM | 69 | C57 | OCT | X | 4 | 14.937 | 22.053 | 33.411 | 1.00 | 0.00 | C |
| ATOM | 70 | C58 | OCT | X | 4 | 13.695 | 22.232 | 35.832 | 1.00 | 0.00 | C |
| ATOM | 71 | C59 | OCT | X | 4 | 14.559 | 20.878 | 34.058 | 1.00 | 0.00 | C |
| ATOM | 72 | C60 | OCT | X | 4 | 14.546 | 23.283 | 33.963 | 1.00 | 0.00 | C |
| ATOM | 73 | C61 | OCT | X | 4 | 13.998 | 23.368 | 35.208 | 1.00 | 0.00 | C |
| ATOM | 74 | C62 | OCT | X | 4 | 13.991 | 20.971 | 35.395 | 1.00 | 0.00 | C |
| ATOM | 75 | C63 | OCT | X | 4 | 19.441 | 17.126 | 33.927 | 1.00 | 0.00 | C |
| ATOM | 76 | C64 | OCT | X | 4 | 19.136 | 16.086 | 36.486 | 1.00 | 0.00 | C |
| ATOM | 77 | C65 | OCT | X | 4 | 18.165 | 16.836 | 34.429 | 1.00 | 0.00 | C |
| ATOM | 78 | C66 | OCT | X | 4 | 20.565 | 16.717 | 34.638 | 1.00 | 0.00 | C |
| ATOM | 79 | C67 | OCT | X | 4 | 20.429 | 16.196 | 35.915 | 1.00 | 0.00 | C |
| ATOM | 80 | C68 | OCT | X | 4 | 18.002 | 16.407 | 35.749 | 1.00 | 0.00 | C |
| ATOM | 81 | O13 | OCT | X | 4 | 21.912 | 26.965 | 36.945 | 1.00 | 0.00 | O |
| ATOM | 82 | O14 | OCT | X | 4 | 13.587 | 24.610 | 35.736 | 1.00 | 0.00 | O |
| ATOM | 83 | O15 | OCT | X | 4 | 13.620 | 19.843 | 36.145 | 1.00 | 0.00 | O |
| ATOM | 84 | O16 | OCT | X | 4 | 25.269 | 23.521 | 36.833 | 1.00 | 0.00 | O |
| ATOM | 85 | O17 | OCT | X | 4 | 25.240 | 18.738 | 36.792 | 1.00 | 0.00 | O |
| ATOM | 86 | O18 | OCT | X | 4 | 16.775 | 16.419 | 36.398 | 1.00 | 0.00 | O |
| ATOM | 87 | O19 | OCT | X | 4 | 21.524 | 15.691 | 36.622 | 1.00 | 0.00 | O |
| ATOM | 88 | C69 | OCT | X | 4 | 14.194 | 25.824 | 35.472 | 1.00 | 0.00 | C |
| ATOM | 89 | C70 | OCT | X | 4 | 15.383 | 28.377 | 34.983 | 1.00 | 0.00 | C |
| ATOM | 90 | C71 | OCT | X | 4 | 15.527 | 26.040 | 35.779 | 1.00 | 0.00 | C |
| ATOM | 91 | C72 | OCT | X | 4 | 13.484 | 26.876 | 34.831 | 1.00 | 0.00 | C |
| ATOM | 92 | C73 | OCT | X | 4 | 14.059 | 28.123 | 34.600 | 1.00 | 0.00 | C |
| ATOM | 93 | C74 | OCT | X | 4 | 16.092 | 27.305 | 35.629 | 1.00 | 0.00 | C |
| ATOM | 94 | O20 | OCT | X | 4 | 17.355 | 27.553 | 36.117 | 1.00 | 0.00 | O |
| ATOM | 95 | C75 | OCT | X | 4 | 24.854 | 24.794 | 36.641 | 1.00 | 0.00 | C |
| ATOM | 96 | C76 | OCT | X | 4 | 24.077 | 27.411 | 36.102 | 1.00 | 0.00 | C |
| ATOM | 97 | C77 | OCT | X | 4 | 25.784 | 25.652 | 36.112 | 1.00 | 0.00 | C |

|      |     |     |     |   |   |        |        |        |      |      |   |
|------|-----|-----|-----|---|---|--------|--------|--------|------|------|---|
| ATOM | 98  | C78 | OCT | X | 4 | 23.575 | 25.222 | 36.909 | 1.00 | 0.00 | C |
| ATOM | 99  | C79 | OCT | X | 4 | 23.185 | 26.542 | 36.675 | 1.00 | 0.00 | C |
| ATOM | 100 | C80 | OCT | X | 4 | 25.371 | 26.954 | 35.776 | 1.00 | 0.00 | C |
| ATOM | 101 | C81 | OCT | X | 4 | 13.980 | 18.603 | 35.702 | 1.00 | 0.00 | C |
| ATOM | 102 | C82 | OCT | X | 4 | 14.900 | 16.060 | 35.072 | 1.00 | 0.00 | C |
| ATOM | 103 | C83 | OCT | X | 4 | 13.129 | 17.802 | 34.933 | 1.00 | 0.00 | C |
| ATOM | 104 | C84 | OCT | X | 4 | 15.271 | 18.262 | 36.086 | 1.00 | 0.00 | C |
| ATOM | 105 | C85 | OCT | X | 4 | 15.658 | 16.938 | 35.830 | 1.00 | 0.00 | C |
| ATOM | 106 | C86 | OCT | X | 4 | 13.644 | 16.520 | 34.596 | 1.00 | 0.00 | C |
| ATOM | 107 | C87 | OCT | X | 4 | 12.753 | 15.521 | 34.005 | 1.00 | 0.00 | C |
| ATOM | 108 | O21 | OCT | X | 4 | 11.873 | 15.901 | 33.240 | 1.00 | 0.00 | O |
| ATOM | 109 | C88 | OCT | X | 4 | 25.950 | 14.361 | 34.844 | 1.00 | 0.00 | C |
| ATOM | 110 | O22 | OCT | X | 4 | 27.102 | 14.545 | 34.565 | 1.00 | 0.00 | O |
| ATOM | 111 | C89 | OCT | X | 4 | 26.335 | 27.945 | 35.235 | 1.00 | 0.00 | C |
| ATOM | 112 | O23 | OCT | X | 4 | 27.470 | 27.667 | 34.901 | 1.00 | 0.00 | O |
| ATOM | 113 | O24 | OCT | X | 4 | 19.244 | 16.053 | 25.197 | 1.00 | 0.00 | O |
| ATOM | 114 | O25 | OCT | X | 4 | 15.545 | 21.254 | 24.818 | 1.00 | 0.00 | O |
| ATOM | 115 | O26 | OCT | X | 4 | 18.730 | 26.491 | 25.004 | 1.00 | 0.00 | O |
| ATOM | 116 | C90 | OCT | X | 4 | 13.252 | 29.255 | 33.987 | 1.00 | 0.00 | C |
| ATOM | 117 | O27 | OCT | X | 4 | 12.067 | 29.093 | 33.693 | 1.00 | 0.00 | O |
| ATOM | 118 | O28 | OCT | X | 4 | 25.604 | 13.208 | 34.856 | 1.00 | 0.00 | O |
| ATOM | 119 | O29 | OCT | X | 4 | 13.072 | 14.332 | 34.008 | 1.00 | 0.00 | O |
| ATOM | 120 | O30 | OCT | X | 4 | 13.753 | 30.334 | 33.819 | 1.00 | 0.00 | O |
| ATOM | 121 | O31 | OCT | X | 4 | 25.939 | 29.091 | 35.075 | 1.00 | 0.00 | O |
| ATOM | 122 | O32 | OCT | X | 4 | 24.637 | 23.270 | 25.195 | 1.00 | 0.00 | O |
| ATOM | 123 | C91 | OCT | X | 4 | 24.713 | 17.513 | 36.449 | 1.00 | 0.00 | C |
| ATOM | 124 | C92 | OCT | X | 4 | 23.654 | 15.105 | 35.602 | 1.00 | 0.00 | C |
| ATOM | 125 | C93 | OCT | X | 4 | 23.452 | 17.127 | 36.848 | 1.00 | 0.00 | C |
| ATOM | 126 | C94 | OCT | X | 4 | 25.534 | 16.622 | 35.695 | 1.00 | 0.00 | C |
| ATOM | 127 | C95 | OCT | X | 4 | 25.003 | 15.374 | 35.386 | 1.00 | 0.00 | C |
| ATOM | 128 | C96 | OCT | X | 4 | 22.850 | 16.034 | 36.298 | 1.00 | 0.00 | C |
| ATOM | 129 | H1  | OCT | X | 4 | 21.690 | 22.946 | 28.548 | 1.00 | 0.00 | H |
| ATOM | 130 | H2  | OCT | X | 4 | 23.259 | 24.396 | 32.939 | 1.00 | 0.00 | H |
| ATOM | 131 | H3  | OCT | X | 4 | 24.685 | 21.419 | 29.775 | 1.00 | 0.00 | H |
| ATOM | 132 | H4  | OCT | X | 4 | 23.099 | 21.255 | 32.862 | 1.00 | 0.00 | H |
| ATOM | 133 | H5  | OCT | X | 4 | 21.276 | 20.142 | 28.489 | 1.00 | 0.00 | H |
| ATOM | 134 | H6  | OCT | X | 4 | 23.075 | 18.142 | 32.629 | 1.00 | 0.00 | H |
| ATOM | 135 | H7  | OCT | X | 4 | 19.691 | 17.071 | 29.645 | 1.00 | 0.00 | H |
| ATOM | 136 | H8  | OCT | X | 4 | 19.859 | 18.708 | 32.648 | 1.00 | 0.00 | H |
| ATOM | 137 | H9  | OCT | X | 4 | 20.481 | 26.302 | 29.514 | 1.00 | 0.00 | H |
| ATOM | 138 | H10 | OCT | X | 4 | 16.249 | 18.712 | 32.305 | 1.00 | 0.00 | H |
| ATOM | 139 | H11 | OCT | X | 4 | 16.750 | 25.274 | 32.184 | 1.00 | 0.00 | H |
| ATOM | 140 | H12 | OCT | X | 4 | 16.812 | 21.941 | 32.348 | 1.00 | 0.00 | H |
| ATOM | 141 | H13 | OCT | X | 4 | 18.899 | 23.154 | 28.246 | 1.00 | 0.00 | H |
| ATOM | 142 | H14 | OCT | X | 4 | 18.606 | 20.279 | 28.161 | 1.00 | 0.00 | H |
| ATOM | 143 | H15 | OCT | X | 4 | 15.460 | 21.910 | 29.157 | 1.00 | 0.00 | H |
| ATOM | 144 | H16 | OCT | X | 4 | 19.812 | 24.751 | 32.702 | 1.00 | 0.00 | H |
| ATOM | 145 | H17 | OCT | X | 4 | 18.698 | 17.991 | 27.487 | 1.00 | 0.00 | H |
| ATOM | 146 | H18 | OCT | X | 4 | 20.231 | 18.819 | 27.149 | 1.00 | 0.00 | H |
| ATOM | 147 | H19 | OCT | X | 4 | 21.509 | 16.811 | 27.331 | 1.00 | 0.00 | H |
| ATOM | 148 | H20 | OCT | X | 4 | 20.099 | 15.756 | 27.620 | 1.00 | 0.00 | H |
| ATOM | 149 | H21 | OCT | X | 4 | 22.906 | 21.840 | 27.327 | 1.00 | 0.00 | H |
| ATOM | 150 | H22 | OCT | X | 4 | 23.914 | 20.497 | 27.426 | 1.00 | 0.00 | H |
| ATOM | 151 | H23 | OCT | X | 4 | 24.532 | 23.564 | 27.580 | 1.00 | 0.00 | H |
| ATOM | 152 | H24 | OCT | X | 4 | 25.747 | 22.439 | 28.020 | 1.00 | 0.00 | H |
| ATOM | 153 | H25 | OCT | X | 4 | 21.606 | 25.582 | 27.431 | 1.00 | 0.00 | H |
| ATOM | 154 | H26 | OCT | X | 4 | 20.341 | 24.453 | 27.201 | 1.00 | 0.00 | H |
| ATOM | 155 | H27 | OCT | X | 4 | 18.766 | 26.413 | 27.571 | 1.00 | 0.00 | H |
| ATOM | 156 | H28 | OCT | X | 4 | 20.220 | 27.490 | 27.473 | 1.00 | 0.00 | H |
| ATOM | 157 | H29 | OCT | X | 4 | 17.426 | 22.326 | 26.907 | 1.00 | 0.00 | H |

|      |     |     |     |   |   |        |        |        |      |      |   |
|------|-----|-----|-----|---|---|--------|--------|--------|------|------|---|
| ATOM | 158 | H30 | OCT | X | 4 | 16.588 | 20.762 | 27.077 | 1.00 | 0.00 | H |
| ATOM | 159 | H31 | OCT | X | 4 | 14.557 | 22.170 | 27.190 | 1.00 | 0.00 | H |
| ATOM | 160 | H32 | OCT | X | 4 | 15.678 | 23.637 | 27.016 | 1.00 | 0.00 | H |
| ATOM | 161 | H33 | OCT | X | 4 | 25.619 | 21.149 | 37.808 | 1.00 | 0.00 | H |
| ATOM | 162 | H34 | OCT | X | 4 | 24.694 | 18.956 | 34.209 | 1.00 | 0.00 | H |
| ATOM | 163 | H35 | OCT | X | 4 | 24.820 | 23.369 | 34.237 | 1.00 | 0.00 | H |
| ATOM | 164 | H36 | OCT | X | 4 | 19.664 | 27.807 | 37.481 | 1.00 | 0.00 | H |
| ATOM | 165 | H37 | OCT | X | 4 | 17.825 | 26.812 | 33.678 | 1.00 | 0.00 | H |
| ATOM | 166 | H38 | OCT | X | 4 | 22.095 | 26.135 | 34.459 | 1.00 | 0.00 | H |
| ATOM | 167 | H39 | OCT | X | 4 | 13.237 | 22.242 | 36.818 | 1.00 | 0.00 | H |
| ATOM | 168 | H40 | OCT | X | 4 | 14.817 | 19.903 | 33.653 | 1.00 | 0.00 | H |
| ATOM | 169 | H41 | OCT | X | 4 | 14.962 | 24.209 | 33.574 | 1.00 | 0.00 | H |
| ATOM | 170 | H42 | OCT | X | 4 | 18.950 | 15.663 | 37.470 | 1.00 | 0.00 | H |
| ATOM | 171 | H43 | OCT | X | 4 | 17.264 | 17.117 | 33.891 | 1.00 | 0.00 | H |
| ATOM | 172 | H44 | OCT | X | 4 | 21.526 | 16.864 | 34.151 | 1.00 | 0.00 | H |
| ATOM | 173 | H45 | OCT | X | 4 | 15.806 | 29.377 | 34.929 | 1.00 | 0.00 | H |
| ATOM | 174 | H46 | OCT | X | 4 | 15.945 | 25.190 | 36.312 | 1.00 | 0.00 | H |
| ATOM | 175 | H47 | OCT | X | 4 | 12.457 | 26.727 | 34.506 | 1.00 | 0.00 | H |
| ATOM | 176 | H48 | OCT | X | 4 | 23.740 | 28.362 | 35.698 | 1.00 | 0.00 | H |
| ATOM | 177 | H49 | OCT | X | 4 | 26.792 | 25.322 | 35.876 | 1.00 | 0.00 | H |
| ATOM | 178 | H50 | OCT | X | 4 | 22.922 | 24.473 | 37.349 | 1.00 | 0.00 | H |
| ATOM | 179 | H51 | OCT | X | 4 | 15.192 | 15.042 | 34.828 | 1.00 | 0.00 | H |
| ATOM | 180 | H52 | OCT | X | 4 | 12.161 | 18.122 | 34.559 | 1.00 | 0.00 | H |
| ATOM | 181 | H53 | OCT | X | 4 | 15.876 | 18.846 | 36.775 | 1.00 | 0.00 | H |
| ATOM | 182 | H54 | OCT | X | 4 | 23.229 | 14.190 | 35.197 | 1.00 | 0.00 | H |
| ATOM | 183 | H55 | OCT | X | 4 | 22.807 | 17.807 | 37.399 | 1.00 | 0.00 | H |
| ATOM | 184 | H56 | OCT | X | 4 | 26.562 | 16.902 | 35.482 | 1.00 | 0.00 | H |
| ATOM | 185 | C1  | MOL | X | 5 | 19.188 | 21.198 | 33.018 | 1.00 | 0.00 | C |
| ATOM | 186 | C2  | MOL | X | 5 | 18.619 | 20.462 | 34.079 | 1.00 | 0.00 | C |
| ATOM | 187 | C3  | MOL | X | 5 | 19.095 | 20.662 | 35.345 | 1.00 | 0.00 | C |
| ATOM | 188 | C4  | MOL | X | 5 | 20.264 | 21.485 | 35.524 | 1.00 | 0.00 | C |
| ATOM | 189 | C5  | MOL | X | 5 | 20.909 | 22.077 | 34.434 | 1.00 | 0.00 | C |
| ATOM | 190 | C6  | MOL | X | 5 | 20.375 | 21.923 | 33.180 | 1.00 | 0.00 | C |
| ATOM | 191 | C7  | MOL | X | 5 | 20.857 | 21.585 | 36.964 | 1.00 | 0.00 | C |
| ATOM | 192 | C8  | MOL | X | 5 | 19.770 | 21.927 | 38.090 | 1.00 | 0.00 | C |
| ATOM | 193 | N1  | MOL | X | 5 | 20.269 | 22.143 | 39.498 | 1.00 | 0.00 | N |
| ATOM | 194 | C9  | MOL | X | 5 | 19.119 | 22.465 | 40.475 | 1.00 | 0.00 | C |
| ATOM | 195 | C10 | MOL | X | 5 | 21.321 | 23.167 | 39.571 | 1.00 | 0.00 | C |
| ATOM | 196 | C11 | MOL | X | 5 | 20.899 | 20.944 | 40.047 | 1.00 | 0.00 | C |
| ATOM | 197 | H1  | MOL | X | 5 | 18.313 | 21.761 | 40.259 | 1.00 | 0.00 | H |
| ATOM | 198 | H2  | MOL | X | 5 | 18.811 | 23.496 | 40.294 | 1.00 | 0.00 | H |
| ATOM | 199 | H3  | MOL | X | 5 | 19.529 | 22.422 | 41.485 | 1.00 | 0.00 | H |
| ATOM | 200 | H4  | MOL | X | 5 | 22.084 | 22.958 | 38.820 | 1.00 | 0.00 | H |
| ATOM | 201 | H5  | MOL | X | 5 | 21.729 | 23.283 | 40.576 | 1.00 | 0.00 | H |
| ATOM | 202 | H6  | MOL | X | 5 | 20.944 | 24.126 | 39.212 | 1.00 | 0.00 | H |
| ATOM | 203 | H7  | MOL | X | 5 | 20.227 | 20.092 | 39.936 | 1.00 | 0.00 | H |
| ATOM | 204 | H8  | MOL | X | 5 | 21.780 | 20.797 | 39.421 | 1.00 | 0.00 | H |
| ATOM | 205 | H9  | MOL | X | 5 | 21.115 | 21.192 | 41.087 | 1.00 | 0.00 | H |
| ATOM | 206 | H10 | MOL | X | 5 | 18.822 | 20.979 | 32.019 | 1.00 | 0.00 | H |
| ATOM | 207 | H11 | MOL | X | 5 | 17.750 | 19.825 | 33.931 | 1.00 | 0.00 | H |
| ATOM | 208 | H12 | MOL | X | 5 | 18.647 | 20.287 | 36.262 | 1.00 | 0.00 | H |
| ATOM | 209 | H13 | MOL | X | 5 | 21.846 | 22.578 | 34.664 | 1.00 | 0.00 | H |
| ATOM | 210 | H14 | MOL | X | 5 | 20.892 | 22.381 | 32.341 | 1.00 | 0.00 | H |
| ATOM | 211 | H15 | MOL | X | 5 | 21.450 | 20.705 | 37.220 | 1.00 | 0.00 | H |
| ATOM | 212 | H16 | MOL | X | 5 | 21.497 | 22.469 | 36.925 | 1.00 | 0.00 | H |
| ATOM | 213 | H17 | MOL | X | 5 | 19.336 | 22.885 | 37.798 | 1.00 | 0.00 | H |
| ATOM | 214 | H18 | MOL | X | 5 | 19.063 | 21.098 | 38.140 | 1.00 | 0.00 | H |
| END  |     |     |     |   |   |        |        |        |      |      |   |

**OAH-G6**

|      |    |     |     |   |   |        |        |        |      |      |   |
|------|----|-----|-----|---|---|--------|--------|--------|------|------|---|
| ATOM | 1  | C1  | OCT | X | 4 | 21.338 | 25.277 | 30.071 | 1.00 | 0.00 | C |
| ATOM | 2  | C2  | OCT | X | 4 | 23.253 | 23.789 | 31.436 | 1.00 | 0.00 | C |
| ATOM | 3  | C3  | OCT | X | 4 | 22.016 | 24.231 | 29.411 | 1.00 | 0.00 | C |
| ATOM | 4  | C4  | OCT | X | 4 | 21.639 | 25.604 | 31.394 | 1.00 | 0.00 | C |
| ATOM | 5  | C5  | OCT | X | 4 | 22.621 | 24.829 | 32.042 | 1.00 | 0.00 | C |
| ATOM | 6  | C6  | OCT | X | 4 | 22.951 | 23.448 | 30.123 | 1.00 | 0.00 | C |
| ATOM | 7  | O1  | OCT | X | 4 | 24.225 | 23.131 | 32.171 | 1.00 | 0.00 | O |
| ATOM | 8  | C7  | OCT | X | 4 | 23.626 | 22.196 | 29.497 | 1.00 | 0.00 | C |
| ATOM | 9  | C8  | OCT | X | 4 | 23.742 | 21.906 | 32.783 | 1.00 | 0.00 | C |
| ATOM | 10 | O2  | OCT | X | 4 | 24.320 | 20.845 | 31.954 | 1.00 | 0.00 | O |
| ATOM | 11 | C9  | OCT | X | 4 | 23.419 | 20.224 | 31.104 | 1.00 | 0.00 | C |
| ATOM | 12 | C10 | OCT | X | 4 | 22.963 | 20.893 | 29.904 | 1.00 | 0.00 | C |
| ATOM | 13 | C11 | OCT | X | 4 | 22.001 | 20.229 | 29.167 | 1.00 | 0.00 | C |
| ATOM | 14 | C12 | OCT | X | 4 | 22.840 | 19.068 | 31.525 | 1.00 | 0.00 | C |
| ATOM | 15 | C13 | OCT | X | 4 | 21.354 | 19.074 | 29.614 | 1.00 | 0.00 | C |
| ATOM | 16 | C14 | OCT | X | 4 | 21.709 | 18.537 | 30.815 | 1.00 | 0.00 | C |
| ATOM | 17 | O3  | OCT | X | 4 | 20.973 | 17.420 | 31.368 | 1.00 | 0.00 | O |
| ATOM | 18 | C15 | OCT | X | 4 | 20.041 | 18.738 | 28.884 | 1.00 | 0.00 | C |
| ATOM | 19 | C16 | OCT | X | 4 | 18.869 | 19.417 | 29.503 | 1.00 | 0.00 | C |
| ATOM | 20 | C17 | OCT | X | 4 | 18.261 | 18.877 | 30.648 | 1.00 | 0.00 | C |
| ATOM | 21 | C18 | OCT | X | 4 | 19.847 | 17.816 | 32.098 | 1.00 | 0.00 | C |
| ATOM | 22 | O4  | OCT | X | 4 | 18.651 | 17.707 | 31.240 | 1.00 | 0.00 | O |
| ATOM | 23 | O5  | OCT | X | 4 | 21.054 | 26.607 | 32.133 | 1.00 | 0.00 | O |
| ATOM | 24 | C19 | OCT | X | 4 | 20.254 | 26.077 | 29.320 | 1.00 | 0.00 | C |
| ATOM | 25 | C20 | OCT | X | 4 | 18.919 | 25.478 | 29.707 | 1.00 | 0.00 | C |
| ATOM | 26 | O6  | OCT | X | 4 | 18.794 | 27.071 | 31.618 | 1.00 | 0.00 | O |
| ATOM | 27 | C21 | OCT | X | 4 | 18.195 | 26.103 | 30.772 | 1.00 | 0.00 | C |
| ATOM | 28 | C22 | OCT | X | 4 | 17.364 | 19.655 | 31.375 | 1.00 | 0.00 | C |
| ATOM | 29 | C23 | OCT | X | 4 | 16.847 | 20.793 | 30.773 | 1.00 | 0.00 | C |
| ATOM | 30 | C24 | OCT | X | 4 | 16.986 | 25.545 | 31.258 | 1.00 | 0.00 | C |
| ATOM | 31 | C25 | OCT | X | 4 | 16.581 | 24.282 | 30.717 | 1.00 | 0.00 | C |
| ATOM | 32 | O7  | OCT | X | 4 | 15.747 | 21.263 | 31.361 | 1.00 | 0.00 | O |
| ATOM | 33 | O8  | OCT | X | 4 | 15.451 | 23.665 | 31.291 | 1.00 | 0.00 | O |
| ATOM | 34 | C26 | OCT | X | 4 | 15.817 | 22.534 | 32.109 | 1.00 | 0.00 | C |
| ATOM | 35 | C27 | OCT | X | 4 | 18.454 | 24.360 | 29.049 | 1.00 | 0.00 | C |
| ATOM | 36 | C28 | OCT | X | 4 | 17.274 | 23.753 | 29.547 | 1.00 | 0.00 | C |
| ATOM | 37 | C29 | OCT | X | 4 | 18.443 | 20.622 | 28.985 | 1.00 | 0.00 | C |
| ATOM | 38 | C30 | OCT | X | 4 | 16.716 | 22.497 | 28.930 | 1.00 | 0.00 | C |
| ATOM | 39 | C31 | OCT | X | 4 | 17.357 | 21.275 | 29.607 | 1.00 | 0.00 | C |
| ATOM | 40 | C32 | OCT | X | 4 | 19.671 | 26.441 | 32.558 | 1.00 | 0.00 | C |
| ATOM | 41 | C33 | OCT | X | 4 | 20.179 | 18.495 | 27.377 | 1.00 | 0.00 | C |
| ATOM | 42 | C34 | OCT | X | 4 | 20.999 | 17.252 | 26.997 | 1.00 | 0.00 | C |
| ATOM | 43 | C35 | OCT | X | 4 | 21.107 | 17.180 | 25.504 | 1.00 | 0.00 | C |
| ATOM | 44 | O9  | OCT | X | 4 | 21.829 | 17.874 | 24.866 | 1.00 | 0.00 | O |
| ATOM | 45 | C36 | OCT | X | 4 | 23.818 | 22.355 | 27.987 | 1.00 | 0.00 | C |
| ATOM | 46 | C37 | OCT | X | 4 | 24.888 | 21.373 | 27.376 | 1.00 | 0.00 | C |
| ATOM | 47 | C38 | OCT | X | 4 | 24.976 | 21.523 | 25.955 | 1.00 | 0.00 | C |
| ATOM | 48 | O10 | OCT | X | 4 | 25.863 | 22.200 | 25.470 | 1.00 | 0.00 | O |
| ATOM | 49 | C39 | OCT | X | 4 | 20.294 | 26.360 | 27.784 | 1.00 | 0.00 | C |
| ATOM | 50 | C40 | OCT | X | 4 | 19.270 | 27.433 | 27.426 | 1.00 | 0.00 | C |
| ATOM | 51 | C41 | OCT | X | 4 | 19.384 | 27.823 | 25.966 | 1.00 | 0.00 | C |
| ATOM | 52 | O11 | OCT | X | 4 | 20.438 | 28.151 | 25.489 | 1.00 | 0.00 | O |
| ATOM | 53 | C42 | OCT | X | 4 | 16.683 | 22.440 | 27.346 | 1.00 | 0.00 | C |
| ATOM | 54 | C43 | OCT | X | 4 | 15.817 | 23.523 | 26.665 | 1.00 | 0.00 | C |
| ATOM | 55 | C44 | OCT | X | 4 | 15.980 | 23.527 | 25.162 | 1.00 | 0.00 | C |
| ATOM | 56 | O12 | OCT | X | 4 | 15.933 | 24.532 | 24.497 | 1.00 | 0.00 | O |
| ATOM | 57 | C45 | OCT | X | 4 | 24.233 | 21.796 | 34.237 | 1.00 | 0.00 | C |
| ATOM | 58 | C46 | OCT | X | 4 | 24.891 | 21.606 | 37.012 | 1.00 | 0.00 | C |

|      |     |     |     |   |   |        |        |        |      |      |   |
|------|-----|-----|-----|---|---|--------|--------|--------|------|------|---|
| ATOM | 59  | C47 | OCT | X | 4 | 24.063 | 20.591 | 34.908 | 1.00 | 0.00 | C |
| ATOM | 60  | C48 | OCT | X | 4 | 24.586 | 22.963 | 34.956 | 1.00 | 0.00 | C |
| ATOM | 61  | C49 | OCT | X | 4 | 24.877 | 22.870 | 36.393 | 1.00 | 0.00 | C |
| ATOM | 62  | C50 | OCT | X | 4 | 24.522 | 20.504 | 36.230 | 1.00 | 0.00 | C |
| ATOM | 63  | C51 | OCT | X | 4 | 19.477 | 27.017 | 33.944 | 1.00 | 0.00 | C |
| ATOM | 64  | C52 | OCT | X | 4 | 19.133 | 27.710 | 36.593 | 1.00 | 0.00 | C |
| ATOM | 65  | C53 | OCT | X | 4 | 18.276 | 27.597 | 34.365 | 1.00 | 0.00 | C |
| ATOM | 66  | C54 | OCT | X | 4 | 20.528 | 26.728 | 34.918 | 1.00 | 0.00 | C |
| ATOM | 67  | C55 | OCT | X | 4 | 20.284 | 27.081 | 36.226 | 1.00 | 0.00 | C |
| ATOM | 68  | C56 | OCT | X | 4 | 18.145 | 27.970 | 35.661 | 1.00 | 0.00 | C |
| ATOM | 69  | C57 | OCT | X | 4 | 15.087 | 22.437 | 33.465 | 1.00 | 0.00 | C |
| ATOM | 70  | C58 | OCT | X | 4 | 13.946 | 22.223 | 36.065 | 1.00 | 0.00 | C |
| ATOM | 71  | C59 | OCT | X | 4 | 14.657 | 21.155 | 33.994 | 1.00 | 0.00 | C |
| ATOM | 72  | C60 | OCT | X | 4 | 14.840 | 23.627 | 34.195 | 1.00 | 0.00 | C |
| ATOM | 73  | C61 | OCT | X | 4 | 14.288 | 23.456 | 35.497 | 1.00 | 0.00 | C |
| ATOM | 74  | C62 | OCT | X | 4 | 14.107 | 21.075 | 35.292 | 1.00 | 0.00 | C |
| ATOM | 75  | C63 | OCT | X | 4 | 19.666 | 16.941 | 33.295 | 1.00 | 0.00 | C |
| ATOM | 76  | C64 | OCT | X | 4 | 19.383 | 15.910 | 35.870 | 1.00 | 0.00 | C |
| ATOM | 77  | C65 | OCT | X | 4 | 18.440 | 16.989 | 33.916 | 1.00 | 0.00 | C |
| ATOM | 78  | C66 | OCT | X | 4 | 20.728 | 16.375 | 33.915 | 1.00 | 0.00 | C |
| ATOM | 79  | C67 | OCT | X | 4 | 20.637 | 15.805 | 35.206 | 1.00 | 0.00 | C |
| ATOM | 80  | C68 | OCT | X | 4 | 18.299 | 16.430 | 35.213 | 1.00 | 0.00 | C |
| ATOM | 81  | O13 | OCT | X | 4 | 21.129 | 26.671 | 37.274 | 1.00 | 0.00 | O |
| ATOM | 82  | O14 | OCT | X | 4 | 14.040 | 24.527 | 36.270 | 1.00 | 0.00 | O |
| ATOM | 83  | O15 | OCT | X | 4 | 13.872 | 19.892 | 35.896 | 1.00 | 0.00 | O |
| ATOM | 84  | O16 | OCT | X | 4 | 25.136 | 23.958 | 37.213 | 1.00 | 0.00 | O |
| ATOM | 85  | O17 | OCT | X | 4 | 24.324 | 19.282 | 36.960 | 1.00 | 0.00 | O |
| ATOM | 86  | O18 | OCT | X | 4 | 17.136 | 16.519 | 35.951 | 1.00 | 0.00 | O |
| ATOM | 87  | O19 | OCT | X | 4 | 21.784 | 15.358 | 35.959 | 1.00 | 0.00 | O |
| ATOM | 88  | C69 | OCT | X | 4 | 14.331 | 25.841 | 35.938 | 1.00 | 0.00 | C |
| ATOM | 89  | C70 | OCT | X | 4 | 14.709 | 28.501 | 35.249 | 1.00 | 0.00 | C |
| ATOM | 90  | C71 | OCT | X | 4 | 15.521 | 26.445 | 36.263 | 1.00 | 0.00 | C |
| ATOM | 91  | C72 | OCT | X | 4 | 13.332 | 26.518 | 35.310 | 1.00 | 0.00 | C |
| ATOM | 92  | C73 | OCT | X | 4 | 13.544 | 27.788 | 34.920 | 1.00 | 0.00 | C |
| ATOM | 93  | C74 | OCT | X | 4 | 15.698 | 27.776 | 35.850 | 1.00 | 0.00 | C |
| ATOM | 94  | O20 | OCT | X | 4 | 16.869 | 28.443 | 36.101 | 1.00 | 0.00 | O |
| ATOM | 95  | C75 | OCT | X | 4 | 24.557 | 25.169 | 36.964 | 1.00 | 0.00 | C |
| ATOM | 96  | C76 | OCT | X | 4 | 23.249 | 27.606 | 36.771 | 1.00 | 0.00 | C |
| ATOM | 97  | C77 | OCT | X | 4 | 25.265 | 26.297 | 36.680 | 1.00 | 0.00 | C |
| ATOM | 98  | C78 | OCT | X | 4 | 23.139 | 25.255 | 37.216 | 1.00 | 0.00 | C |
| ATOM | 99  | C79 | OCT | X | 4 | 22.501 | 26.512 | 37.141 | 1.00 | 0.00 | C |
| ATOM | 100 | C80 | OCT | X | 4 | 24.644 | 27.552 | 36.580 | 1.00 | 0.00 | C |
| ATOM | 101 | C81 | OCT | X | 4 | 14.309 | 18.703 | 35.424 | 1.00 | 0.00 | C |
| ATOM | 102 | C82 | OCT | X | 4 | 15.222 | 16.259 | 34.525 | 1.00 | 0.00 | C |
| ATOM | 103 | C83 | OCT | X | 4 | 13.574 | 17.947 | 34.519 | 1.00 | 0.00 | C |
| ATOM | 104 | C84 | OCT | X | 4 | 15.504 | 18.216 | 35.916 | 1.00 | 0.00 | C |
| ATOM | 105 | C85 | OCT | X | 4 | 15.991 | 17.024 | 35.396 | 1.00 | 0.00 | C |
| ATOM | 106 | C86 | OCT | X | 4 | 13.953 | 16.655 | 34.072 | 1.00 | 0.00 | C |
| ATOM | 107 | C87 | OCT | X | 4 | 13.100 | 15.858 | 33.112 | 1.00 | 0.00 | C |
| ATOM | 108 | O21 | OCT | X | 4 | 12.143 | 16.322 | 32.587 | 1.00 | 0.00 | O |
| ATOM | 109 | C88 | OCT | X | 4 | 26.654 | 15.271 | 35.335 | 1.00 | 0.00 | C |
| ATOM | 110 | O22 | OCT | X | 4 | 26.698 | 14.066 | 35.407 | 1.00 | 0.00 | O |
| ATOM | 111 | C89 | OCT | X | 4 | 25.451 | 28.768 | 36.148 | 1.00 | 0.00 | C |
| ATOM | 112 | O23 | OCT | X | 4 | 26.640 | 28.609 | 35.887 | 1.00 | 0.00 | O |
| ATOM | 113 | O24 | OCT | X | 4 | 20.532 | 16.331 | 24.807 | 1.00 | 0.00 | O |
| ATOM | 114 | O25 | OCT | X | 4 | 16.169 | 22.472 | 24.600 | 1.00 | 0.00 | O |
| ATOM | 115 | O26 | OCT | X | 4 | 18.424 | 27.836 | 25.215 | 1.00 | 0.00 | O |
| ATOM | 116 | C90 | OCT | X | 4 | 12.458 | 28.440 | 34.088 | 1.00 | 0.00 | C |
| ATOM | 117 | O27 | OCT | X | 4 | 12.487 | 29.622 | 33.932 | 1.00 | 0.00 | O |
| ATOM | 118 | O28 | OCT | X | 4 | 27.625 | 15.955 | 35.029 | 1.00 | 0.00 | O |

|      |     |     |     |   |   |        |        |        |      |      |   |
|------|-----|-----|-----|---|---|--------|--------|--------|------|------|---|
| ATOM | 119 | O29 | OCT | X | 4 | 13.347 | 14.622 | 33.043 | 1.00 | 0.00 | O |
| ATOM | 120 | O30 | OCT | X | 4 | 11.531 | 27.785 | 33.668 | 1.00 | 0.00 | O |
| ATOM | 121 | O31 | OCT | X | 4 | 25.035 | 29.904 | 35.968 | 1.00 | 0.00 | O |
| ATOM | 122 | O32 | OCT | X | 4 | 24.496 | 20.648 | 25.272 | 1.00 | 0.00 | O |
| ATOM | 123 | C91 | OCT | X | 4 | 24.250 | 18.003 | 36.427 | 1.00 | 0.00 | C |
| ATOM | 124 | C92 | OCT | X | 4 | 24.123 | 15.348 | 35.578 | 1.00 | 0.00 | C |
| ATOM | 125 | C93 | OCT | X | 4 | 23.006 | 17.357 | 36.337 | 1.00 | 0.00 | C |
| ATOM | 126 | C94 | OCT | X | 4 | 25.444 | 17.343 | 36.052 | 1.00 | 0.00 | C |
| ATOM | 127 | C95 | OCT | X | 4 | 25.362 | 16.001 | 35.628 | 1.00 | 0.00 | C |
| ATOM | 128 | C96 | OCT | X | 4 | 22.942 | 15.999 | 35.912 | 1.00 | 0.00 | C |
| ATOM | 129 | H1  | OCT | X | 4 | 21.765 | 23.965 | 28.387 | 1.00 | 0.00 | H |
| ATOM | 130 | H2  | OCT | X | 4 | 22.881 | 24.954 | 33.089 | 1.00 | 0.00 | H |
| ATOM | 131 | H3  | OCT | X | 4 | 24.671 | 22.105 | 29.801 | 1.00 | 0.00 | H |
| ATOM | 132 | H4  | OCT | X | 4 | 22.643 | 21.875 | 32.794 | 1.00 | 0.00 | H |
| ATOM | 133 | H5  | OCT | X | 4 | 21.623 | 20.730 | 28.279 | 1.00 | 0.00 | H |
| ATOM | 134 | H6  | OCT | X | 4 | 23.276 | 18.470 | 32.321 | 1.00 | 0.00 | H |
| ATOM | 135 | H7  | OCT | X | 4 | 19.723 | 17.734 | 29.173 | 1.00 | 0.00 | H |
| ATOM | 136 | H8  | OCT | X | 4 | 19.984 | 18.871 | 32.380 | 1.00 | 0.00 | H |
| ATOM | 137 | H9  | OCT | X | 4 | 20.323 | 27.131 | 29.598 | 1.00 | 0.00 | H |
| ATOM | 138 | H10 | OCT | X | 4 | 16.883 | 19.344 | 32.299 | 1.00 | 0.00 | H |
| ATOM | 139 | H11 | OCT | X | 4 | 16.398 | 26.031 | 32.032 | 1.00 | 0.00 | H |
| ATOM | 140 | H12 | OCT | X | 4 | 16.887 | 22.688 | 32.317 | 1.00 | 0.00 | H |
| ATOM | 141 | H13 | OCT | X | 4 | 19.054 | 23.875 | 28.284 | 1.00 | 0.00 | H |
| ATOM | 142 | H14 | OCT | X | 4 | 18.999 | 21.093 | 28.178 | 1.00 | 0.00 | H |
| ATOM | 143 | H15 | OCT | X | 4 | 15.648 | 22.528 | 29.157 | 1.00 | 0.00 | H |
| ATOM | 144 | H16 | OCT | X | 4 | 19.382 | 25.389 | 32.699 | 1.00 | 0.00 | H |
| ATOM | 145 | H17 | OCT | X | 4 | 19.185 | 18.337 | 26.953 | 1.00 | 0.00 | H |
| ATOM | 146 | H18 | OCT | X | 4 | 20.625 | 19.349 | 26.864 | 1.00 | 0.00 | H |
| ATOM | 147 | H19 | OCT | X | 4 | 21.994 | 17.322 | 27.440 | 1.00 | 0.00 | H |
| ATOM | 148 | H20 | OCT | X | 4 | 20.580 | 16.312 | 27.363 | 1.00 | 0.00 | H |
| ATOM | 149 | H21 | OCT | X | 4 | 24.180 | 23.370 | 27.813 | 1.00 | 0.00 | H |
| ATOM | 150 | H22 | OCT | X | 4 | 22.890 | 22.395 | 27.413 | 1.00 | 0.00 | H |
| ATOM | 151 | H23 | OCT | X | 4 | 25.836 | 21.744 | 27.772 | 1.00 | 0.00 | H |
| ATOM | 152 | H24 | OCT | X | 4 | 24.847 | 20.299 | 27.570 | 1.00 | 0.00 | H |
| ATOM | 153 | H25 | OCT | X | 4 | 21.313 | 26.694 | 27.575 | 1.00 | 0.00 | H |
| ATOM | 154 | H26 | OCT | X | 4 | 20.160 | 25.467 | 27.170 | 1.00 | 0.00 | H |
| ATOM | 155 | H27 | OCT | X | 4 | 18.299 | 26.974 | 27.624 | 1.00 | 0.00 | H |
| ATOM | 156 | H28 | OCT | X | 4 | 19.432 | 28.311 | 28.056 | 1.00 | 0.00 | H |
| ATOM | 157 | H29 | OCT | X | 4 | 17.678 | 22.522 | 26.903 | 1.00 | 0.00 | H |
| ATOM | 158 | H30 | OCT | X | 4 | 16.352 | 21.434 | 27.081 | 1.00 | 0.00 | H |
| ATOM | 159 | H31 | OCT | X | 4 | 14.796 | 23.333 | 27.001 | 1.00 | 0.00 | H |
| ATOM | 160 | H32 | OCT | X | 4 | 16.168 | 24.519 | 26.945 | 1.00 | 0.00 | H |
| ATOM | 161 | H33 | OCT | X | 4 | 25.245 | 21.413 | 38.022 | 1.00 | 0.00 | H |
| ATOM | 162 | H34 | OCT | X | 4 | 23.556 | 19.728 | 34.483 | 1.00 | 0.00 | H |
| ATOM | 163 | H35 | OCT | X | 4 | 24.614 | 23.928 | 34.457 | 1.00 | 0.00 | H |
| ATOM | 164 | H36 | OCT | X | 4 | 19.143 | 28.054 | 37.624 | 1.00 | 0.00 | H |
| ATOM | 165 | H37 | OCT | X | 4 | 17.405 | 27.747 | 33.731 | 1.00 | 0.00 | H |
| ATOM | 166 | H38 | OCT | X | 4 | 21.472 | 26.251 | 34.670 | 1.00 | 0.00 | H |
| ATOM | 167 | H39 | OCT | X | 4 | 13.630 | 22.095 | 37.097 | 1.00 | 0.00 | H |
| ATOM | 168 | H40 | OCT | X | 4 | 14.869 | 20.268 | 33.402 | 1.00 | 0.00 | H |
| ATOM | 169 | H41 | OCT | X | 4 | 15.118 | 24.627 | 33.871 | 1.00 | 0.00 | H |
| ATOM | 170 | H42 | OCT | X | 4 | 19.323 | 15.404 | 36.830 | 1.00 | 0.00 | H |
| ATOM | 171 | H43 | OCT | X | 4 | 17.604 | 17.477 | 33.420 | 1.00 | 0.00 | H |
| ATOM | 172 | H44 | OCT | X | 4 | 21.709 | 16.400 | 33.447 | 1.00 | 0.00 | H |
| ATOM | 173 | H45 | OCT | X | 4 | 14.781 | 29.542 | 34.942 | 1.00 | 0.00 | H |
| ATOM | 174 | H46 | OCT | X | 4 | 16.308 | 25.907 | 36.786 | 1.00 | 0.00 | H |
| ATOM | 175 | H47 | OCT | X | 4 | 12.337 | 26.105 | 35.168 | 1.00 | 0.00 | H |
| ATOM | 176 | H48 | OCT | X | 4 | 22.688 | 28.501 | 36.515 | 1.00 | 0.00 | H |
| ATOM | 177 | H49 | OCT | X | 4 | 26.349 | 26.295 | 36.593 | 1.00 | 0.00 | H |
| ATOM | 178 | H50 | OCT | X | 4 | 22.579 | 24.378 | 37.531 | 1.00 | 0.00 | H |

|      |     |     |     |   |   |        |        |        |      |      |   |
|------|-----|-----|-----|---|---|--------|--------|--------|------|------|---|
| ATOM | 179 | H51 | OCT | X | 4 | 15.691 | 15.319 | 34.243 | 1.00 | 0.00 | H |
| ATOM | 180 | H52 | OCT | X | 4 | 12.719 | 18.456 | 34.081 | 1.00 | 0.00 | H |
| ATOM | 181 | H53 | OCT | X | 4 | 16.136 | 18.760 | 36.613 | 1.00 | 0.00 | H |
| ATOM | 182 | H54 | OCT | X | 4 | 24.040 | 14.335 | 35.193 | 1.00 | 0.00 | H |
| ATOM | 183 | H55 | OCT | X | 4 | 22.089 | 17.812 | 36.703 | 1.00 | 0.00 | H |
| ATOM | 184 | H56 | OCT | X | 4 | 26.386 | 17.826 | 36.298 | 1.00 | 0.00 | H |
| ATOM | 185 | O1  | MOL | X | 5 | 20.220 | 22.861 | 33.191 | 1.00 | 0.00 | O |
| ATOM | 186 | O2  | MOL | X | 5 | 21.274 | 23.790 | 34.761 | 1.00 | 0.00 | O |
| ATOM | 187 | N1  | MOL | X | 5 | 20.471 | 22.983 | 34.372 | 1.00 | 0.00 | N |
| ATOM | 188 | C1  | MOL | X | 5 | 19.698 | 22.175 | 35.254 | 1.00 | 0.00 | C |
| ATOM | 189 | C2  | MOL | X | 5 | 19.684 | 22.413 | 36.643 | 1.00 | 0.00 | C |
| ATOM | 190 | C3  | MOL | X | 5 | 19.004 | 21.085 | 34.772 | 1.00 | 0.00 | C |
| ATOM | 191 | C4  | MOL | X | 5 | 18.872 | 21.632 | 37.507 | 1.00 | 0.00 | C |
| ATOM | 192 | C5  | MOL | X | 5 | 18.281 | 20.312 | 35.674 | 1.00 | 0.00 | C |
| ATOM | 193 | C6  | MOL | X | 5 | 18.164 | 20.573 | 36.983 | 1.00 | 0.00 | C |
| ATOM | 194 | C7  | MOL | X | 5 | 18.952 | 21.861 | 38.982 | 1.00 | 0.00 | C |
| ATOM | 195 | O3  | MOL | X | 5 | 19.500 | 22.889 | 39.351 | 1.00 | 0.00 | O |
| ATOM | 196 | O4  | MOL | X | 5 | 18.301 | 21.199 | 39.739 | 1.00 | 0.00 | O |
| ATOM | 197 | H1  | MOL | X | 5 | 20.367 | 23.161 | 37.038 | 1.00 | 0.00 | H |
| ATOM | 198 | H2  | MOL | X | 5 | 19.106 | 20.783 | 33.733 | 1.00 | 0.00 | H |
| ATOM | 199 | H3  | MOL | X | 5 | 17.802 | 19.416 | 35.289 | 1.00 | 0.00 | H |
| ATOM | 200 | H4  | MOL | X | 5 | 17.669 | 19.824 | 37.595 | 1.00 | 0.00 | H |
| END  |     |     |     |   |   |        |        |        |      |      |   |

## OAMe-G1

|      |    |     |     |   |   |        |        |        |      |      |   |
|------|----|-----|-----|---|---|--------|--------|--------|------|------|---|
| ATOM | 1  | C1  | OCB | X | 4 | 22.023 | 24.482 | 31.447 | 1.00 | 0.00 | C |
| ATOM | 2  | C2  | OCB | X | 4 | 24.185 | 23.068 | 32.525 | 1.00 | 0.00 | C |
| ATOM | 3  | C3  | OCB | X | 4 | 22.578 | 23.376 | 30.799 | 1.00 | 0.00 | C |
| ATOM | 4  | C4  | OCB | X | 4 | 22.563 | 24.822 | 32.696 | 1.00 | 0.00 | C |
| ATOM | 5  | C5  | OCB | X | 4 | 23.635 | 24.129 | 33.208 | 1.00 | 0.00 | C |
| ATOM | 6  | C6  | OCB | X | 4 | 23.662 | 22.640 | 31.265 | 1.00 | 0.00 | C |
| ATOM | 7  | O1  | OCB | X | 4 | 25.191 | 22.424 | 33.090 | 1.00 | 0.00 | O |
| ATOM | 8  | C7  | OCB | X | 4 | 24.207 | 21.322 | 30.669 | 1.00 | 0.00 | C |
| ATOM | 9  | C8  | OCB | X | 4 | 24.860 | 21.107 | 33.733 | 1.00 | 0.00 | C |
| ATOM | 10 | O2  | OCB | X | 4 | 25.224 | 19.919 | 32.946 | 1.00 | 0.00 | O |
| ATOM | 11 | C9  | OCB | X | 4 | 24.139 | 19.418 | 32.294 | 1.00 | 0.00 | C |
| ATOM | 12 | C10 | OCB | X | 4 | 23.589 | 20.078 | 31.239 | 1.00 | 0.00 | C |
| ATOM | 13 | C11 | OCB | X | 4 | 22.456 | 19.533 | 30.681 | 1.00 | 0.00 | C |
| ATOM | 14 | C12 | OCB | X | 4 | 23.562 | 18.300 | 32.855 | 1.00 | 0.00 | C |
| ATOM | 15 | C13 | OCB | X | 4 | 21.796 | 18.462 | 31.216 | 1.00 | 0.00 | C |
| ATOM | 16 | C14 | OCB | X | 4 | 22.345 | 17.865 | 32.357 | 1.00 | 0.00 | C |
| ATOM | 17 | O3  | OCB | X | 4 | 21.807 | 16.784 | 32.950 | 1.00 | 0.00 | O |
| ATOM | 18 | C15 | OCB | X | 4 | 20.504 | 17.874 | 30.641 | 1.00 | 0.00 | C |
| ATOM | 19 | C16 | OCB | X | 4 | 19.323 | 18.466 | 31.438 | 1.00 | 0.00 | C |
| ATOM | 20 | C17 | OCB | X | 4 | 18.854 | 17.979 | 32.624 | 1.00 | 0.00 | C |
| ATOM | 21 | C18 | OCB | X | 4 | 20.829 | 17.186 | 33.910 | 1.00 | 0.00 | C |
| ATOM | 22 | O4  | OCB | X | 4 | 19.515 | 16.971 | 33.363 | 1.00 | 0.00 | O |
| ATOM | 23 | O5  | OCB | X | 4 | 22.004 | 25.861 | 33.486 | 1.00 | 0.00 | O |
| ATOM | 24 | C19 | OCB | X | 4 | 20.757 | 25.185 | 30.911 | 1.00 | 0.00 | C |
| ATOM | 25 | C20 | OCB | X | 4 | 19.487 | 24.655 | 31.574 | 1.00 | 0.00 | C |
| ATOM | 26 | O6  | OCB | X | 4 | 19.732 | 26.098 | 33.524 | 1.00 | 0.00 | O |
| ATOM | 27 | C21 | OCB | X | 4 | 19.068 | 25.136 | 32.832 | 1.00 | 0.00 | C |
| ATOM | 28 | C22 | OCB | X | 4 | 17.827 | 18.528 | 33.304 | 1.00 | 0.00 | C |
| ATOM | 29 | C23 | OCB | X | 4 | 17.271 | 19.714 | 32.813 | 1.00 | 0.00 | C |
| ATOM | 30 | C24 | OCB | X | 4 | 18.066 | 24.455 | 33.589 | 1.00 | 0.00 | C |
| ATOM | 31 | C25 | OCB | X | 4 | 17.509 | 23.287 | 33.055 | 1.00 | 0.00 | C |
| ATOM | 32 | O7  | OCB | X | 4 | 16.354 | 20.336 | 33.586 | 1.00 | 0.00 | O |



|      |    |     |     |   |   |        |        |        |      |      |   |
|------|----|-----|-----|---|---|--------|--------|--------|------|------|---|
| ATOM | 33 | O8  | OCB | X | 4 | 16.400 | 22.741 | 33.700 | 1.00 | 0.00 | O |
| ATOM | 34 | C26 | OCB | X | 4 | 16.750 | 21.462 | 34.419 | 1.00 | 0.00 | C |
| ATOM | 35 | C27 | OCB | X | 4 | 18.783 | 23.573 | 31.020 | 1.00 | 0.00 | C |
| ATOM | 36 | C28 | OCB | X | 4 | 17.867 | 22.847 | 31.743 | 1.00 | 0.00 | C |
| ATOM | 37 | C29 | OCB | X | 4 | 18.726 | 19.643 | 30.952 | 1.00 | 0.00 | C |
| ATOM | 38 | C30 | OCB | X | 4 | 17.131 | 21.648 | 31.142 | 1.00 | 0.00 | C |
| ATOM | 39 | C31 | OCB | X | 4 | 17.751 | 20.360 | 31.686 | 1.00 | 0.00 | C |
| ATOM | 40 | C32 | OCB | X | 4 | 20.845 | 25.613 | 34.300 | 1.00 | 0.00 | C |
| ATOM | 41 | C33 | OCB | X | 4 | 20.354 | 17.819 | 29.155 | 1.00 | 0.00 | C |
| ATOM | 42 | C34 | OCB | X | 4 | 21.322 | 16.913 | 28.466 | 1.00 | 0.00 | C |
| ATOM | 43 | C35 | OCB | X | 4 | 21.232 | 16.910 | 26.968 | 1.00 | 0.00 | C |
| ATOM | 44 | O9  | OCB | X | 4 | 21.747 | 17.729 | 26.274 | 1.00 | 0.00 | O |
| ATOM | 45 | C36 | OCB | X | 4 | 24.268 | 21.211 | 29.103 | 1.00 | 0.00 | C |
| ATOM | 46 | C37 | OCB | X | 4 | 25.185 | 22.301 | 28.489 | 1.00 | 0.00 | C |
| ATOM | 47 | C38 | OCB | X | 4 | 25.328 | 22.131 | 26.996 | 1.00 | 0.00 | C |
| ATOM | 48 | O10 | OCB | X | 4 | 25.113 | 23.024 | 26.228 | 1.00 | 0.00 | O |
| ATOM | 49 | C39 | OCB | X | 4 | 20.629 | 25.258 | 29.335 | 1.00 | 0.00 | C |
| ATOM | 50 | C40 | OCB | X | 4 | 21.652 | 26.320 | 28.718 | 1.00 | 0.00 | C |
| ATOM | 51 | C41 | OCB | X | 4 | 21.413 | 26.410 | 27.220 | 1.00 | 0.00 | C |
| ATOM | 52 | O11 | OCB | X | 4 | 21.123 | 25.395 | 26.623 | 1.00 | 0.00 | O |
| ATOM | 53 | C42 | OCB | X | 4 | 16.861 | 21.585 | 29.604 | 1.00 | 0.00 | C |
| ATOM | 54 | C43 | OCB | X | 4 | 15.593 | 22.420 | 29.213 | 1.00 | 0.00 | C |
| ATOM | 55 | C44 | OCB | X | 4 | 15.176 | 22.093 | 27.791 | 1.00 | 0.00 | C |
| ATOM | 56 | O12 | OCB | X | 4 | 15.875 | 21.382 | 27.129 | 1.00 | 0.00 | O |
| ATOM | 57 | C45 | OCB | X | 4 | 25.737 | 21.100 | 35.007 | 1.00 | 0.00 | C |
| ATOM | 58 | C46 | OCB | X | 4 | 26.784 | 21.091 | 37.656 | 1.00 | 0.00 | C |
| ATOM | 59 | C47 | OCB | X | 4 | 25.905 | 19.901 | 35.768 | 1.00 | 0.00 | C |
| ATOM | 60 | C48 | OCB | X | 4 | 26.064 | 22.284 | 35.720 | 1.00 | 0.00 | C |
| ATOM | 61 | C49 | OCB | X | 4 | 26.560 | 22.305 | 37.044 | 1.00 | 0.00 | C |
| ATOM | 62 | C50 | OCB | X | 4 | 26.523 | 19.904 | 37.058 | 1.00 | 0.00 | C |
| ATOM | 63 | C51 | OCB | X | 4 | 21.048 | 26.131 | 35.710 | 1.00 | 0.00 | C |
| ATOM | 64 | C52 | OCB | X | 4 | 21.301 | 27.351 | 38.196 | 1.00 | 0.00 | C |
| ATOM | 65 | C53 | OCB | X | 4 | 19.949 | 26.617 | 36.415 | 1.00 | 0.00 | C |
| ATOM | 66 | C54 | OCB | X | 4 | 22.263 | 26.228 | 36.315 | 1.00 | 0.00 | C |
| ATOM | 67 | C55 | OCB | X | 4 | 22.409 | 26.839 | 37.551 | 1.00 | 0.00 | C |
| ATOM | 68 | C56 | OCB | X | 4 | 20.066 | 27.095 | 37.696 | 1.00 | 0.00 | C |
| ATOM | 69 | C57 | OCB | X | 4 | 16.158 | 21.563 | 35.746 | 1.00 | 0.00 | C |
| ATOM | 70 | C58 | OCB | X | 4 | 15.543 | 21.508 | 38.479 | 1.00 | 0.00 | C |
| ATOM | 71 | C59 | OCB | X | 4 | 15.955 | 20.329 | 36.401 | 1.00 | 0.00 | C |
| ATOM | 72 | C60 | OCB | X | 4 | 15.972 | 22.745 | 36.461 | 1.00 | 0.00 | C |
| ATOM | 73 | C61 | OCB | X | 4 | 15.662 | 22.720 | 37.816 | 1.00 | 0.00 | C |
| ATOM | 74 | C62 | OCB | X | 4 | 15.672 | 20.338 | 37.782 | 1.00 | 0.00 | C |
| ATOM | 75 | C63 | OCB | X | 4 | 20.888 | 16.532 | 35.271 | 1.00 | 0.00 | C |
| ATOM | 76 | C64 | OCB | X | 4 | 20.911 | 15.306 | 37.800 | 1.00 | 0.00 | C |
| ATOM | 77 | C65 | OCB | X | 4 | 19.716 | 16.247 | 35.982 | 1.00 | 0.00 | C |
| ATOM | 78 | C66 | OCB | X | 4 | 22.069 | 16.174 | 35.833 | 1.00 | 0.00 | C |
| ATOM | 79 | C67 | OCB | X | 4 | 22.112 | 15.631 | 37.120 | 1.00 | 0.00 | C |
| ATOM | 80 | C68 | OCB | X | 4 | 19.723 | 15.633 | 37.244 | 1.00 | 0.00 | C |
| ATOM | 81 | O13 | OCB | X | 4 | 23.613 | 27.056 | 38.268 | 1.00 | 0.00 | O |
| ATOM | 82 | O14 | OCB | X | 4 | 15.577 | 23.898 | 38.579 | 1.00 | 0.00 | O |
| ATOM | 83 | O15 | OCB | X | 4 | 15.642 | 19.144 | 38.488 | 1.00 | 0.00 | O |
| ATOM | 84 | O16 | OCB | X | 4 | 26.845 | 23.602 | 37.606 | 1.00 | 0.00 | O |
| ATOM | 85 | O17 | OCB | X | 4 | 26.717 | 18.738 | 37.745 | 1.00 | 0.00 | O |
| ATOM | 86 | O18 | OCB | X | 4 | 18.575 | 15.244 | 37.997 | 1.00 | 0.00 | O |
| ATOM | 87 | O19 | OCB | X | 4 | 23.277 | 15.300 | 37.744 | 1.00 | 0.00 | O |
| ATOM | 88 | C69 | OCB | X | 4 | 16.078 | 25.146 | 38.184 | 1.00 | 0.00 | C |
| ATOM | 89 | C70 | OCB | X | 4 | 16.873 | 27.676 | 37.226 | 1.00 | 0.00 | C |
| ATOM | 90 | C71 | OCB | X | 4 | 17.362 | 25.612 | 38.455 | 1.00 | 0.00 | C |
| ATOM | 91 | C72 | OCB | X | 4 | 15.192 | 25.899 | 37.358 | 1.00 | 0.00 | C |
| ATOM | 92 | C73 | OCB | X | 4 | 15.633 | 27.092 | 36.829 | 1.00 | 0.00 | C |

|      |     |     |     |   |   |        |        |        |      |      |   |
|------|-----|-----|-----|---|---|--------|--------|--------|------|------|---|
| ATOM | 93  | C74 | OCB | X | 4 | 17.696 | 26.912 | 38.064 | 1.00 | 0.00 | C |
| ATOM | 94  | O20 | OCB | X | 4 | 18.922 | 27.444 | 38.362 | 1.00 | 0.00 | O |
| ATOM | 95  | C75 | OCB | X | 4 | 26.435 | 24.881 | 37.380 | 1.00 | 0.00 | C |
| ATOM | 96  | C76 | OCB | X | 4 | 25.600 | 27.512 | 37.085 | 1.00 | 0.00 | C |
| ATOM | 97  | C77 | OCB | X | 4 | 27.091 | 25.778 | 36.512 | 1.00 | 0.00 | C |
| ATOM | 98  | C78 | OCB | X | 4 | 25.213 | 25.310 | 37.987 | 1.00 | 0.00 | C |
| ATOM | 99  | C79 | OCB | X | 4 | 24.755 | 26.617 | 37.796 | 1.00 | 0.00 | C |
| ATOM | 100 | C80 | OCB | X | 4 | 26.745 | 27.149 | 36.363 | 1.00 | 0.00 | C |
| ATOM | 101 | C81 | OCB | X | 4 | 15.945 | 17.901 | 37.985 | 1.00 | 0.00 | C |
| ATOM | 102 | C82 | OCB | X | 4 | 16.366 | 15.214 | 37.141 | 1.00 | 0.00 | C |
| ATOM | 103 | C83 | OCB | X | 4 | 14.976 | 17.155 | 37.300 | 1.00 | 0.00 | C |
| ATOM | 104 | C84 | OCB | X | 4 | 17.192 | 17.312 | 38.204 | 1.00 | 0.00 | C |
| ATOM | 105 | C85 | OCB | X | 4 | 17.382 | 15.974 | 37.764 | 1.00 | 0.00 | C |
| ATOM | 106 | C86 | OCB | X | 4 | 15.115 | 15.821 | 36.893 | 1.00 | 0.00 | C |
| ATOM | 107 | C87 | OCB | X | 4 | 14.013 | 14.948 | 36.317 | 1.00 | 0.00 | C |
| ATOM | 108 | O21 | OCB | X | 4 | 12.844 | 15.151 | 36.650 | 1.00 | 0.00 | O |
| ATOM | 109 | C88 | OCB | X | 4 | 27.313 | 14.704 | 34.953 | 1.00 | 0.00 | C |
| ATOM | 110 | O22 | OCB | X | 4 | 27.026 | 13.560 | 34.743 | 1.00 | 0.00 | O |
| ATOM | 111 | C89 | OCB | X | 4 | 27.504 | 28.087 | 35.439 | 1.00 | 0.00 | C |
| ATOM | 112 | O23 | OCB | X | 4 | 27.045 | 29.127 | 35.099 | 1.00 | 0.00 | O |
| ATOM | 113 | O24 | OCB | X | 4 | 20.661 | 15.929 | 26.507 | 1.00 | 0.00 | O |
| ATOM | 114 | O25 | OCB | X | 4 | 14.276 | 22.800 | 27.242 | 1.00 | 0.00 | O |
| ATOM | 115 | O26 | OCB | X | 4 | 21.459 | 27.481 | 26.638 | 1.00 | 0.00 | O |
| ATOM | 116 | C90 | OCB | X | 4 | 14.809 | 27.772 | 35.828 | 1.00 | 0.00 | C |
| ATOM | 117 | O27 | OCB | X | 4 | 14.990 | 28.964 | 35.587 | 1.00 | 0.00 | O |
| ATOM | 118 | O28 | OCB | X | 4 | 28.441 | 15.038 | 34.624 | 1.00 | 0.00 | O |
| ATOM | 119 | O29 | OCB | X | 4 | 14.249 | 13.922 | 35.741 | 1.00 | 0.00 | O |
| ATOM | 120 | O30 | OCB | X | 4 | 13.938 | 27.220 | 35.144 | 1.00 | 0.00 | O |
| ATOM | 121 | O31 | OCB | X | 4 | 28.517 | 27.731 | 34.901 | 1.00 | 0.00 | O |
| ATOM | 122 | O32 | OCB | X | 4 | 25.495 | 20.992 | 26.476 | 1.00 | 0.00 | O |
| ATOM | 123 | C91 | OCB | X | 4 | 26.224 | 17.555 | 37.223 | 1.00 | 0.00 | C |
| ATOM | 124 | C92 | OCB | X | 4 | 25.271 | 15.078 | 36.450 | 1.00 | 0.00 | C |
| ATOM | 125 | C93 | OCB | X | 4 | 25.013 | 17.064 | 37.779 | 1.00 | 0.00 | C |
| ATOM | 126 | C94 | OCB | X | 4 | 26.951 | 16.774 | 36.340 | 1.00 | 0.00 | C |
| ATOM | 127 | C95 | OCB | X | 4 | 26.540 | 15.485 | 35.954 | 1.00 | 0.00 | C |
| ATOM | 128 | C96 | OCB | X | 4 | 24.506 | 15.848 | 37.368 | 1.00 | 0.00 | C |
| ATOM | 129 | C97 | OCB | X | 4 | 24.121 | 17.827 | 38.776 | 1.00 | 0.00 | C |
| ATOM | 130 | C98 | OCB | X | 4 | 24.486 | 24.341 | 38.881 | 1.00 | 0.00 | C |
| ATOM | 131 | C99 | OCB | X | 4 | 18.264 | 24.647 | 39.209 | 1.00 | 0.00 | C |
| ATOM | 132 | C   | OCB | X | 4 | 18.243 | 18.063 | 38.898 | 1.00 | 0.00 | C |
| ATOM | 133 | H1  | OCB | X | 4 | 22.072 | 23.097 | 29.879 | 1.00 | 0.00 | H |
| ATOM | 134 | H2  | OCB | X | 4 | 23.989 | 24.351 | 34.211 | 1.00 | 0.00 | H |
| ATOM | 135 | H3  | OCB | X | 4 | 25.258 | 21.259 | 30.957 | 1.00 | 0.00 | H |
| ATOM | 136 | H4  | OCB | X | 4 | 23.787 | 21.108 | 33.972 | 1.00 | 0.00 | H |
| ATOM | 137 | H5  | OCB | X | 4 | 22.006 | 20.019 | 29.819 | 1.00 | 0.00 | H |
| ATOM | 138 | H6  | OCB | X | 4 | 23.922 | 17.857 | 33.780 | 1.00 | 0.00 | H |
| ATOM | 139 | H7  | OCB | X | 4 | 20.556 | 16.811 | 30.888 | 1.00 | 0.00 | H |
| ATOM | 140 | H8  | OCB | X | 4 | 20.925 | 18.260 | 34.123 | 1.00 | 0.00 | H |
| ATOM | 141 | H9  | OCB | X | 4 | 20.831 | 26.223 | 31.242 | 1.00 | 0.00 | H |
| ATOM | 142 | H10 | OCB | X | 4 | 17.435 | 18.099 | 34.222 | 1.00 | 0.00 | H |
| ATOM | 143 | H11 | OCB | X | 4 | 17.769 | 24.743 | 34.594 | 1.00 | 0.00 | H |
| ATOM | 144 | H12 | OCB | X | 4 | 17.847 | 21.424 | 34.478 | 1.00 | 0.00 | H |
| ATOM | 145 | H13 | OCB | X | 4 | 19.119 | 23.098 | 30.101 | 1.00 | 0.00 | H |
| ATOM | 146 | H14 | OCB | X | 4 | 19.169 | 20.121 | 30.082 | 1.00 | 0.00 | H |
| ATOM | 147 | H15 | OCB | X | 4 | 16.199 | 21.766 | 31.697 | 1.00 | 0.00 | H |
| ATOM | 148 | H16 | OCB | X | 4 | 20.696 | 24.528 | 34.404 | 1.00 | 0.00 | H |
| ATOM | 149 | H17 | OCB | X | 4 | 19.371 | 17.526 | 28.779 | 1.00 | 0.00 | H |
| ATOM | 150 | H18 | OCB | X | 4 | 20.443 | 18.770 | 28.626 | 1.00 | 0.00 | H |
| ATOM | 151 | H19 | OCB | X | 4 | 22.318 | 17.312 | 28.671 | 1.00 | 0.00 | H |
| ATOM | 152 | H20 | OCB | X | 4 | 21.384 | 15.917 | 28.909 | 1.00 | 0.00 | H |

|      |     |     |     |   |   |        |        |        |      |      |   |
|------|-----|-----|-----|---|---|--------|--------|--------|------|------|---|
| ATOM | 153 | H21 | OCB | X | 4 | 23.316 | 21.450 | 28.624 | 1.00 | 0.00 | H |
| ATOM | 154 | H22 | OCB | X | 4 | 24.514 | 20.189 | 28.808 | 1.00 | 0.00 | H |
| ATOM | 155 | H23 | OCB | X | 4 | 24.899 | 23.318 | 28.764 | 1.00 | 0.00 | H |
| ATOM | 156 | H24 | OCB | X | 4 | 26.202 | 22.083 | 28.821 | 1.00 | 0.00 | H |
| ATOM | 157 | H25 | OCB | X | 4 | 20.706 | 24.276 | 28.864 | 1.00 | 0.00 | H |
| ATOM | 158 | H26 | OCB | X | 4 | 19.614 | 25.637 | 29.197 | 1.00 | 0.00 | H |
| ATOM | 159 | H27 | OCB | X | 4 | 21.489 | 27.272 | 29.228 | 1.00 | 0.00 | H |
| ATOM | 160 | H28 | OCB | X | 4 | 22.694 | 26.071 | 28.930 | 1.00 | 0.00 | H |
| ATOM | 161 | H29 | OCB | X | 4 | 17.787 | 21.759 | 29.051 | 1.00 | 0.00 | H |
| ATOM | 162 | H30 | OCB | X | 4 | 16.635 | 20.547 | 29.353 | 1.00 | 0.00 | H |
| ATOM | 163 | H31 | OCB | X | 4 | 14.847 | 22.084 | 29.936 | 1.00 | 0.00 | H |
| ATOM | 164 | H32 | OCB | X | 4 | 15.680 | 23.494 | 29.390 | 1.00 | 0.00 | H |
| ATOM | 165 | H33 | OCB | X | 4 | 27.251 | 21.052 | 38.637 | 1.00 | 0.00 | H |
| ATOM | 166 | H34 | OCB | X | 4 | 25.523 | 18.974 | 35.349 | 1.00 | 0.00 | H |
| ATOM | 167 | H35 | OCB | X | 4 | 25.876 | 23.255 | 35.269 | 1.00 | 0.00 | H |
| ATOM | 168 | H36 | OCB | X | 4 | 21.435 | 27.894 | 39.128 | 1.00 | 0.00 | H |
| ATOM | 169 | H37 | OCB | X | 4 | 18.965 | 26.548 | 35.957 | 1.00 | 0.00 | H |
| ATOM | 170 | H38 | OCB | X | 4 | 23.150 | 25.846 | 35.817 | 1.00 | 0.00 | H |
| ATOM | 171 | H39 | OCB | X | 4 | 15.489 | 21.459 | 39.563 | 1.00 | 0.00 | H |
| ATOM | 172 | H40 | OCB | X | 4 | 16.182 | 19.387 | 35.909 | 1.00 | 0.00 | H |
| ATOM | 173 | H41 | OCB | X | 4 | 16.055 | 23.663 | 35.886 | 1.00 | 0.00 | H |
| ATOM | 174 | H42 | OCB | X | 4 | 20.974 | 14.901 | 38.806 | 1.00 | 0.00 | H |
| ATOM | 175 | H43 | OCB | X | 4 | 18.696 | 16.527 | 35.730 | 1.00 | 0.00 | H |
| ATOM | 176 | H44 | OCB | X | 4 | 22.972 | 16.321 | 35.247 | 1.00 | 0.00 | H |
| ATOM | 177 | H45 | OCB | X | 4 | 17.274 | 28.574 | 36.763 | 1.00 | 0.00 | H |
| ATOM | 178 | H46 | OCB | X | 4 | 14.198 | 25.528 | 37.122 | 1.00 | 0.00 | H |
| ATOM | 179 | H47 | OCB | X | 4 | 25.326 | 28.560 | 37.000 | 1.00 | 0.00 | H |
| ATOM | 180 | H48 | OCB | X | 4 | 27.890 | 25.390 | 35.884 | 1.00 | 0.00 | H |
| ATOM | 181 | H49 | OCB | X | 4 | 16.508 | 14.184 | 36.824 | 1.00 | 0.00 | H |
| ATOM | 182 | H50 | OCB | X | 4 | 14.026 | 17.637 | 37.082 | 1.00 | 0.00 | H |
| ATOM | 183 | H51 | OCB | X | 4 | 24.881 | 14.086 | 36.239 | 1.00 | 0.00 | H |
| ATOM | 184 | H52 | OCB | X | 4 | 27.870 | 17.148 | 35.898 | 1.00 | 0.00 | H |
| ATOM | 185 | H53 | OCB | X | 4 | 23.078 | 18.007 | 38.509 | 1.00 | 0.00 | H |
| ATOM | 186 | H54 | OCB | X | 4 | 24.139 | 17.286 | 39.724 | 1.00 | 0.00 | H |
| ATOM | 187 | H55 | OCB | X | 4 | 24.603 | 18.773 | 39.032 | 1.00 | 0.00 | H |
| ATOM | 188 | H56 | OCB | X | 4 | 23.474 | 24.683 | 39.108 | 1.00 | 0.00 | H |
| ATOM | 189 | H57 | OCB | X | 4 | 24.368 | 23.396 | 38.347 | 1.00 | 0.00 | H |
| ATOM | 190 | H58 | OCB | X | 4 | 25.001 | 24.139 | 39.823 | 1.00 | 0.00 | H |
| ATOM | 191 | H59 | OCB | X | 4 | 17.787 | 24.059 | 39.996 | 1.00 | 0.00 | H |
| ATOM | 192 | H60 | OCB | X | 4 | 18.686 | 23.984 | 38.451 | 1.00 | 0.00 | H |
| ATOM | 193 | H61 | OCB | X | 4 | 19.019 | 25.177 | 39.794 | 1.00 | 0.00 | H |
| ATOM | 194 | H62 | OCB | X | 4 | 17.934 | 19.012 | 39.341 | 1.00 | 0.00 | H |
| ATOM | 195 | H63 | OCB | X | 4 | 18.591 | 17.475 | 39.749 | 1.00 | 0.00 | H |
| ATOM | 196 | H64 | OCB | X | 4 | 19.019 | 18.154 | 38.134 | 1.00 | 0.00 | H |
| ATOM | 197 | C1  | MOL | X | 5 | 20.961 | 21.716 | 34.012 | 1.00 | 0.00 | C |
| ATOM | 198 | C2  | MOL | X | 5 | 21.017 | 21.114 | 35.000 | 1.00 | 0.00 | C |
| ATOM | 199 | C3  | MOL | X | 5 | 21.003 | 20.351 | 36.215 | 1.00 | 0.00 | C |
| ATOM | 200 | C4  | MOL | X | 5 | 20.592 | 21.092 | 37.479 | 1.00 | 0.00 | C |
| ATOM | 201 | C5  | MOL | X | 5 | 21.159 | 20.327 | 38.697 | 1.00 | 0.00 | C |
| ATOM | 202 | C6  | MOL | X | 5 | 20.727 | 21.002 | 39.958 | 1.00 | 0.00 | C |
| ATOM | 203 | O1  | MOL | X | 5 | 20.962 | 22.167 | 40.155 | 1.00 | 0.00 | O |
| ATOM | 204 | O2  | MOL | X | 5 | 20.067 | 20.343 | 40.721 | 1.00 | 0.00 | O |
| ATOM | 205 | H1  | MOL | X | 5 | 20.827 | 22.161 | 33.052 | 1.00 | 0.00 | H |
| ATOM | 206 | H2  | MOL | X | 5 | 20.253 | 19.568 | 36.086 | 1.00 | 0.00 | H |
| ATOM | 207 | H3  | MOL | X | 5 | 22.030 | 20.006 | 36.350 | 1.00 | 0.00 | H |
| ATOM | 208 | H4  | MOL | X | 5 | 21.084 | 22.067 | 37.461 | 1.00 | 0.00 | H |
| ATOM | 209 | H5  | MOL | X | 5 | 19.533 | 21.347 | 37.561 | 1.00 | 0.00 | H |
| ATOM | 210 | H6  | MOL | X | 5 | 20.696 | 19.340 | 38.633 | 1.00 | 0.00 | H |
| ATOM | 211 | H7  | MOL | X | 5 | 22.237 | 20.236 | 38.544 | 1.00 | 0.00 | H |

END

**OAMe-G2**

|      |    |     |     |   |   |        |        |        |      |      |   |
|------|----|-----|-----|---|---|--------|--------|--------|------|------|---|
| ATOM | 1  | C1  | OCB | X | 4 | 21.513 | 24.979 | 29.928 | 1.00 | 0.00 | C |
| ATOM | 2  | C2  | OCB | X | 4 | 23.845 | 24.168 | 31.247 | 1.00 | 0.00 | C |
| ATOM | 3  | C3  | OCB | X | 4 | 22.140 | 23.850 | 29.509 | 1.00 | 0.00 | C |
| ATOM | 4  | C4  | OCB | X | 4 | 22.023 | 25.737 | 30.986 | 1.00 | 0.00 | C |
| ATOM | 5  | C5  | OCB | X | 4 | 23.212 | 25.309 | 31.622 | 1.00 | 0.00 | C |
| ATOM | 6  | C6  | OCB | X | 4 | 23.305 | 23.395 | 30.178 | 1.00 | 0.00 | C |
| ATOM | 7  | O1  | OCB | X | 4 | 24.874 | 23.603 | 31.922 | 1.00 | 0.00 | O |
| ATOM | 8  | C7  | OCB | X | 4 | 23.983 | 22.089 | 29.692 | 1.00 | 0.00 | C |
| ATOM | 9  | C8  | OCB | X | 4 | 24.354 | 22.516 | 32.734 | 1.00 | 0.00 | C |
| ATOM | 10 | O2  | OCB | X | 4 | 24.804 | 21.234 | 32.345 | 1.00 | 0.00 | O |
| ATOM | 11 | C9  | OCB | X | 4 | 23.798 | 20.561 | 31.732 | 1.00 | 0.00 | C |
| ATOM | 12 | C10 | OCB | X | 4 | 23.343 | 20.916 | 30.439 | 1.00 | 0.00 | C |
| ATOM | 13 | C11 | OCB | X | 4 | 22.217 | 20.196 | 29.970 | 1.00 | 0.00 | C |
| ATOM | 14 | C12 | OCB | X | 4 | 23.194 | 19.532 | 32.401 | 1.00 | 0.00 | C |
| ATOM | 15 | C13 | OCB | X | 4 | 21.580 | 19.205 | 30.640 | 1.00 | 0.00 | C |
| ATOM | 16 | C14 | OCB | X | 4 | 22.064 | 18.925 | 31.944 | 1.00 | 0.00 | C |
| ATOM | 17 | O3  | OCB | X | 4 | 21.441 | 17.973 | 32.751 | 1.00 | 0.00 | O |
| ATOM | 18 | C15 | OCB | X | 4 | 20.342 | 18.469 | 30.131 | 1.00 | 0.00 | C |
| ATOM | 19 | C16 | OCB | X | 4 | 19.028 | 19.166 | 30.534 | 1.00 | 0.00 | C |
| ATOM | 20 | C17 | OCB | X | 4 | 18.500 | 18.929 | 31.781 | 1.00 | 0.00 | C |
| ATOM | 21 | C18 | OCB | X | 4 | 20.263 | 18.500 | 33.370 | 1.00 | 0.00 | C |
| ATOM | 22 | O4  | OCB | X | 4 | 19.148 | 18.028 | 32.657 | 1.00 | 0.00 | O |
| ATOM | 23 | O5  | OCB | X | 4 | 21.348 | 26.792 | 31.492 | 1.00 | 0.00 | O |
| ATOM | 24 | C19 | OCB | X | 4 | 20.329 | 25.523 | 29.125 | 1.00 | 0.00 | C |
| ATOM | 25 | C20 | OCB | X | 4 | 19.033 | 25.022 | 29.803 | 1.00 | 0.00 | C |
| ATOM | 26 | O6  | OCB | X | 4 | 18.998 | 26.851 | 31.511 | 1.00 | 0.00 | O |
| ATOM | 27 | C21 | OCB | X | 4 | 18.466 | 25.748 | 30.866 | 1.00 | 0.00 | C |
| ATOM | 28 | C22 | OCB | X | 4 | 17.320 | 19.565 | 32.281 | 1.00 | 0.00 | C |
| ATOM | 29 | C23 | OCB | X | 4 | 16.722 | 20.469 | 31.444 | 1.00 | 0.00 | C |
| ATOM | 30 | C24 | OCB | X | 4 | 17.422 | 25.197 | 31.573 | 1.00 | 0.00 | C |
| ATOM | 31 | C25 | OCB | X | 4 | 16.847 | 24.016 | 31.122 | 1.00 | 0.00 | C |
| ATOM | 32 | O7  | OCB | X | 4 | 15.671 | 21.081 | 32.055 | 1.00 | 0.00 | O |
| ATOM | 33 | O8  | OCB | X | 4 | 15.816 | 23.443 | 31.855 | 1.00 | 0.00 | O |
| ATOM | 34 | C26 | OCB | X | 4 | 16.101 | 22.326 | 32.689 | 1.00 | 0.00 | C |
| ATOM | 35 | C27 | OCB | X | 4 | 18.425 | 23.821 | 29.342 | 1.00 | 0.00 | C |
| ATOM | 36 | C28 | OCB | X | 4 | 17.297 | 23.367 | 29.992 | 1.00 | 0.00 | C |
| ATOM | 37 | C29 | OCB | X | 4 | 18.448 | 20.226 | 29.735 | 1.00 | 0.00 | C |
| ATOM | 38 | C30 | OCB | X | 4 | 16.671 | 22.026 | 29.497 | 1.00 | 0.00 | C |
| ATOM | 39 | C31 | OCB | X | 4 | 17.269 | 20.836 | 30.201 | 1.00 | 0.00 | C |
| ATOM | 40 | C32 | OCB | X | 4 | 20.162 | 26.541 | 32.272 | 1.00 | 0.00 | C |
| ATOM | 41 | C33 | OCB | X | 4 | 20.504 | 18.030 | 28.671 | 1.00 | 0.00 | C |
| ATOM | 42 | C34 | OCB | X | 4 | 19.429 | 16.943 | 28.375 | 1.00 | 0.00 | C |
| ATOM | 43 | C35 | OCB | X | 4 | 19.457 | 16.546 | 26.965 | 1.00 | 0.00 | C |
| ATOM | 44 | O9  | OCB | X | 4 | 18.760 | 17.166 | 26.205 | 1.00 | 0.00 | O |
| ATOM | 45 | C36 | OCB | X | 4 | 24.160 | 21.984 | 28.190 | 1.00 | 0.00 | C |
| ATOM | 46 | C37 | OCB | X | 4 | 24.892 | 20.722 | 27.873 | 1.00 | 0.00 | C |
| ATOM | 47 | C38 | OCB | X | 4 | 25.247 | 20.709 | 26.386 | 1.00 | 0.00 | C |
| ATOM | 48 | O10 | OCB | X | 4 | 26.352 | 21.014 | 26.024 | 1.00 | 0.00 | O |
| ATOM | 49 | C39 | OCB | X | 4 | 20.348 | 25.349 | 27.582 | 1.00 | 0.00 | C |
| ATOM | 50 | C40 | OCB | X | 4 | 21.643 | 25.869 | 26.956 | 1.00 | 0.00 | C |
| ATOM | 51 | C41 | OCB | X | 4 | 21.330 | 26.116 | 25.462 | 1.00 | 0.00 | C |
| ATOM | 52 | O11 | OCB | X | 4 | 21.275 | 25.194 | 24.657 | 1.00 | 0.00 | O |
| ATOM | 53 | C42 | OCB | X | 4 | 16.476 | 21.929 | 27.906 | 1.00 | 0.00 | C |
| ATOM | 54 | C43 | OCB | X | 4 | 15.593 | 20.727 | 27.478 | 1.00 | 0.00 | C |
| ATOM | 55 | C44 | OCB | X | 4 | 15.202 | 20.869 | 25.993 | 1.00 | 0.00 | C |
| ATOM | 56 | O12 | OCB | X | 4 | 15.798 | 20.392 | 25.121 | 1.00 | 0.00 | O |
| ATOM | 57 | C45 | OCB | X | 4 | 24.763 | 22.773 | 34.217 | 1.00 | 0.00 | C |

|      |     |     |     |   |   |        |        |        |      |      |   |
|------|-----|-----|-----|---|---|--------|--------|--------|------|------|---|
| ATOM | 58  | C46 | OCB | X | 4 | 25.797 | 23.264 | 36.896 | 1.00 | 0.00 | C |
| ATOM | 59  | C47 | OCB | X | 4 | 25.121 | 21.732 | 35.095 | 1.00 | 0.00 | C |
| ATOM | 60  | C48 | OCB | X | 4 | 25.012 | 24.030 | 34.722 | 1.00 | 0.00 | C |
| ATOM | 61  | C49 | OCB | X | 4 | 25.446 | 24.315 | 36.022 | 1.00 | 0.00 | C |
| ATOM | 62  | C50 | OCB | X | 4 | 25.638 | 21.982 | 36.414 | 1.00 | 0.00 | C |
| ATOM | 63  | C51 | OCB | X | 4 | 20.202 | 27.434 | 33.493 | 1.00 | 0.00 | C |
| ATOM | 64  | C52 | OCB | X | 4 | 20.230 | 28.899 | 35.833 | 1.00 | 0.00 | C |
| ATOM | 65  | C53 | OCB | X | 4 | 19.056 | 27.898 | 34.069 | 1.00 | 0.00 | C |
| ATOM | 66  | C54 | OCB | X | 4 | 21.387 | 27.823 | 34.024 | 1.00 | 0.00 | C |
| ATOM | 67  | C55 | OCB | X | 4 | 21.366 | 28.704 | 35.118 | 1.00 | 0.00 | C |
| ATOM | 68  | C56 | OCB | X | 4 | 19.037 | 28.558 | 35.252 | 1.00 | 0.00 | C |
| ATOM | 69  | C57 | OCB | X | 4 | 15.569 | 22.583 | 34.080 | 1.00 | 0.00 | C |
| ATOM | 70  | C58 | OCB | X | 4 | 14.590 | 23.020 | 36.710 | 1.00 | 0.00 | C |
| ATOM | 71  | C59 | OCB | X | 4 | 15.409 | 21.506 | 34.955 | 1.00 | 0.00 | C |
| ATOM | 72  | C60 | OCB | X | 4 | 15.302 | 23.884 | 34.543 | 1.00 | 0.00 | C |
| ATOM | 73  | C61 | OCB | X | 4 | 14.785 | 24.123 | 35.818 | 1.00 | 0.00 | C |
| ATOM | 74  | C62 | OCB | X | 4 | 14.939 | 21.742 | 36.304 | 1.00 | 0.00 | C |
| ATOM | 75  | C63 | OCB | X | 4 | 20.162 | 17.990 | 34.808 | 1.00 | 0.00 | C |
| ATOM | 76  | C64 | OCB | X | 4 | 20.187 | 17.267 | 37.558 | 1.00 | 0.00 | C |
| ATOM | 77  | C65 | OCB | X | 4 | 18.998 | 17.648 | 35.460 | 1.00 | 0.00 | C |
| ATOM | 78  | C66 | OCB | X | 4 | 21.356 | 17.969 | 35.578 | 1.00 | 0.00 | C |
| ATOM | 79  | C67 | OCB | X | 4 | 21.381 | 17.635 | 36.913 | 1.00 | 0.00 | C |
| ATOM | 80  | C68 | OCB | X | 4 | 18.991 | 17.388 | 36.855 | 1.00 | 0.00 | C |
| ATOM | 81  | O13 | OCB | X | 4 | 22.540 | 29.192 | 35.646 | 1.00 | 0.00 | O |
| ATOM | 82  | O14 | OCB | X | 4 | 14.504 | 25.338 | 36.381 | 1.00 | 0.00 | O |
| ATOM | 83  | O15 | OCB | X | 4 | 14.749 | 20.696 | 37.183 | 1.00 | 0.00 | O |
| ATOM | 84  | O16 | OCB | X | 4 | 25.630 | 25.549 | 36.525 | 1.00 | 0.00 | O |
| ATOM | 85  | O17 | OCB | X | 4 | 25.880 | 20.861 | 37.226 | 1.00 | 0.00 | O |
| ATOM | 86  | O18 | OCB | X | 4 | 17.863 | 17.178 | 37.570 | 1.00 | 0.00 | O |
| ATOM | 87  | O19 | OCB | X | 4 | 22.556 | 17.497 | 37.670 | 1.00 | 0.00 | O |
| ATOM | 88  | C69 | OCB | X | 4 | 14.946 | 26.528 | 35.762 | 1.00 | 0.00 | C |
| ATOM | 89  | C70 | OCB | X | 4 | 15.731 | 28.906 | 34.724 | 1.00 | 0.00 | C |
| ATOM | 90  | C71 | OCB | X | 4 | 16.249 | 27.006 | 36.169 | 1.00 | 0.00 | C |
| ATOM | 91  | C72 | OCB | X | 4 | 14.142 | 27.135 | 34.830 | 1.00 | 0.00 | C |
| ATOM | 92  | C73 | OCB | X | 4 | 14.540 | 28.319 | 34.249 | 1.00 | 0.00 | C |
| ATOM | 93  | C74 | OCB | X | 4 | 16.587 | 28.272 | 35.591 | 1.00 | 0.00 | C |
| ATOM | 94  | O20 | OCB | X | 4 | 17.832 | 28.879 | 35.892 | 1.00 | 0.00 | O |
| ATOM | 95  | C75 | OCB | X | 4 | 25.216 | 26.683 | 35.880 | 1.00 | 0.00 | C |
| ATOM | 96  | C76 | OCB | X | 4 | 24.723 | 29.155 | 34.690 | 1.00 | 0.00 | C |
| ATOM | 97  | C77 | OCB | X | 4 | 26.207 | 27.289 | 35.058 | 1.00 | 0.00 | C |
| ATOM | 98  | C78 | OCB | X | 4 | 23.971 | 27.286 | 36.125 | 1.00 | 0.00 | C |
| ATOM | 99  | C79 | OCB | X | 4 | 23.771 | 28.485 | 35.482 | 1.00 | 0.00 | C |
| ATOM | 100 | C80 | OCB | X | 4 | 25.946 | 28.523 | 34.395 | 1.00 | 0.00 | C |
| ATOM | 101 | C81 | OCB | X | 4 | 15.098 | 19.444 | 36.958 | 1.00 | 0.00 | C |
| ATOM | 102 | C82 | OCB | X | 4 | 15.753 | 16.751 | 36.553 | 1.00 | 0.00 | C |
| ATOM | 103 | C83 | OCB | X | 4 | 14.132 | 18.554 | 36.392 | 1.00 | 0.00 | C |
| ATOM | 104 | C84 | OCB | X | 4 | 16.296 | 18.953 | 37.389 | 1.00 | 0.00 | C |
| ATOM | 105 | C85 | OCB | X | 4 | 16.592 | 17.628 | 37.226 | 1.00 | 0.00 | C |
| ATOM | 106 | C86 | OCB | X | 4 | 14.491 | 17.234 | 36.149 | 1.00 | 0.00 | C |
| ATOM | 107 | C87 | OCB | X | 4 | 13.657 | 16.323 | 35.236 | 1.00 | 0.00 | C |
| ATOM | 108 | O21 | OCB | X | 4 | 14.139 | 15.447 | 34.517 | 1.00 | 0.00 | O |
| ATOM | 109 | C88 | OCB | X | 4 | 26.635 | 16.406 | 35.214 | 1.00 | 0.00 | C |
| ATOM | 110 | O22 | OCB | X | 4 | 25.999 | 15.429 | 34.880 | 1.00 | 0.00 | O |
| ATOM | 111 | C89 | OCB | X | 4 | 27.030 | 29.204 | 33.624 | 1.00 | 0.00 | C |
| ATOM | 112 | O23 | OCB | X | 4 | 26.797 | 30.265 | 33.109 | 1.00 | 0.00 | O |
| ATOM | 113 | O24 | OCB | X | 4 | 20.133 | 15.589 | 26.647 | 1.00 | 0.00 | O |
| ATOM | 114 | O25 | OCB | X | 4 | 14.166 | 21.453 | 25.736 | 1.00 | 0.00 | O |
| ATOM | 115 | O26 | OCB | X | 4 | 20.832 | 27.189 | 25.104 | 1.00 | 0.00 | O |
| ATOM | 116 | C90 | OCB | X | 4 | 13.733 | 28.981 | 33.189 | 1.00 | 0.00 | C |
| ATOM | 117 | O27 | OCB | X | 4 | 12.598 | 28.493 | 32.876 | 1.00 | 0.00 | O |

|      |     |     |     |   |   |        |        |        |      |      |   |
|------|-----|-----|-----|---|---|--------|--------|--------|------|------|---|
| ATOM | 118 | O28 | OCB | X | 4 | 27.661 | 16.737 | 34.703 | 1.00 | 0.00 | O |
| ATOM | 119 | O29 | OCB | X | 4 | 12.447 | 16.393 | 35.149 | 1.00 | 0.00 | O |
| ATOM | 120 | O30 | OCB | X | 4 | 14.034 | 30.027 | 32.658 | 1.00 | 0.00 | O |
| ATOM | 121 | O31 | OCB | X | 4 | 28.189 | 28.855 | 33.916 | 1.00 | 0.00 | O |
| ATOM | 122 | O32 | OCB | X | 4 | 24.338 | 20.554 | 25.563 | 1.00 | 0.00 | O |
| ATOM | 123 | C91 | OCB | X | 4 | 25.395 | 19.616 | 37.068 | 1.00 | 0.00 | C |
| ATOM | 124 | C92 | OCB | X | 4 | 24.566 | 17.145 | 36.410 | 1.00 | 0.00 | C |
| ATOM | 125 | C93 | OCB | X | 4 | 24.172 | 19.192 | 37.537 | 1.00 | 0.00 | C |
| ATOM | 126 | C94 | OCB | X | 4 | 26.331 | 18.765 | 36.454 | 1.00 | 0.00 | C |
| ATOM | 127 | C95 | OCB | X | 4 | 25.901 | 17.459 | 36.076 | 1.00 | 0.00 | C |
| ATOM | 128 | C96 | OCB | X | 4 | 23.757 | 17.951 | 37.210 | 1.00 | 0.00 | C |
| ATOM | 129 | C97 | OCB | X | 4 | 23.332 | 20.159 | 38.269 | 1.00 | 0.00 | C |
| ATOM | 130 | C98 | OCB | X | 4 | 22.946 | 26.784 | 37.140 | 1.00 | 0.00 | C |
| ATOM | 131 | C99 | OCB | X | 4 | 17.163 | 26.247 | 37.142 | 1.00 | 0.00 | C |
| ATOM | 132 | C   | OCB | X | 4 | 17.326 | 19.988 | 37.849 | 1.00 | 0.00 | C |
| ATOM | 133 | H1  | OCB | X | 4 | 21.812 | 23.138 | 28.756 | 1.00 | 0.00 | H |
| ATOM | 134 | H2  | OCB | X | 4 | 23.702 | 25.969 | 32.334 | 1.00 | 0.00 | H |
| ATOM | 135 | H3  | OCB | X | 4 | 25.027 | 22.067 | 30.012 | 1.00 | 0.00 | H |
| ATOM | 136 | H4  | OCB | X | 4 | 23.255 | 22.555 | 32.712 | 1.00 | 0.00 | H |
| ATOM | 137 | H5  | OCB | X | 4 | 21.863 | 20.328 | 28.951 | 1.00 | 0.00 | H |
| ATOM | 138 | H6  | OCB | X | 4 | 23.558 | 19.324 | 33.404 | 1.00 | 0.00 | H |
| ATOM | 139 | H7  | OCB | X | 4 | 20.312 | 17.434 | 30.476 | 1.00 | 0.00 | H |
| ATOM | 140 | H8  | OCB | X | 4 | 20.243 | 19.599 | 33.334 | 1.00 | 0.00 | H |
| ATOM | 141 | H9  | OCB | X | 4 | 20.283 | 26.607 | 29.252 | 1.00 | 0.00 | H |
| ATOM | 142 | H10 | OCB | X | 4 | 16.934 | 19.364 | 33.277 | 1.00 | 0.00 | H |
| ATOM | 143 | H11 | OCB | X | 4 | 17.062 | 25.694 | 32.471 | 1.00 | 0.00 | H |
| ATOM | 144 | H12 | OCB | X | 4 | 17.199 | 22.272 | 32.703 | 1.00 | 0.00 | H |
| ATOM | 145 | H13 | OCB | X | 4 | 18.825 | 23.256 | 28.503 | 1.00 | 0.00 | H |
| ATOM | 146 | H14 | OCB | X | 4 | 18.914 | 20.551 | 28.809 | 1.00 | 0.00 | H |
| ATOM | 147 | H15 | OCB | X | 4 | 15.634 | 22.197 | 29.793 | 1.00 | 0.00 | H |
| ATOM | 148 | H16 | OCB | X | 4 | 20.167 | 25.471 | 32.529 | 1.00 | 0.00 | H |
| ATOM | 149 | H17 | OCB | X | 4 | 20.490 | 18.874 | 27.977 | 1.00 | 0.00 | H |
| ATOM | 150 | H18 | OCB | X | 4 | 21.487 | 17.626 | 28.421 | 1.00 | 0.00 | H |
| ATOM | 151 | H19 | OCB | X | 4 | 19.662 | 16.024 | 28.917 | 1.00 | 0.00 | H |
| ATOM | 152 | H20 | OCB | X | 4 | 18.444 | 17.218 | 28.758 | 1.00 | 0.00 | H |
| ATOM | 153 | H21 | OCB | X | 4 | 24.779 | 22.759 | 27.734 | 1.00 | 0.00 | H |
| ATOM | 154 | H22 | OCB | X | 4 | 23.290 | 22.092 | 27.539 | 1.00 | 0.00 | H |
| ATOM | 155 | H23 | OCB | X | 4 | 25.854 | 20.561 | 28.364 | 1.00 | 0.00 | H |
| ATOM | 156 | H24 | OCB | X | 4 | 24.365 | 19.810 | 28.160 | 1.00 | 0.00 | H |
| ATOM | 157 | H25 | OCB | X | 4 | 20.200 | 24.377 | 27.106 | 1.00 | 0.00 | H |
| ATOM | 158 | H26 | OCB | X | 4 | 19.506 | 25.904 | 27.163 | 1.00 | 0.00 | H |
| ATOM | 159 | H27 | OCB | X | 4 | 21.867 | 26.806 | 27.472 | 1.00 | 0.00 | H |
| ATOM | 160 | H28 | OCB | X | 4 | 22.509 | 25.218 | 27.092 | 1.00 | 0.00 | H |
| ATOM | 161 | H29 | OCB | X | 4 | 15.892 | 22.816 | 27.653 | 1.00 | 0.00 | H |
| ATOM | 162 | H30 | OCB | X | 4 | 17.408 | 21.804 | 27.351 | 1.00 | 0.00 | H |
| ATOM | 163 | H31 | OCB | X | 4 | 16.147 | 19.806 | 27.674 | 1.00 | 0.00 | H |
| ATOM | 164 | H32 | OCB | X | 4 | 14.703 | 20.808 | 28.106 | 1.00 | 0.00 | H |
| ATOM | 165 | H33 | OCB | X | 4 | 26.072 | 23.437 | 37.933 | 1.00 | 0.00 | H |
| ATOM | 166 | H34 | OCB | X | 4 | 25.080 | 20.738 | 34.656 | 1.00 | 0.00 | H |
| ATOM | 167 | H35 | OCB | X | 4 | 24.943 | 24.856 | 34.019 | 1.00 | 0.00 | H |
| ATOM | 168 | H36 | OCB | X | 4 | 20.176 | 29.407 | 36.792 | 1.00 | 0.00 | H |
| ATOM | 169 | H37 | OCB | X | 4 | 18.115 | 27.591 | 33.619 | 1.00 | 0.00 | H |
| ATOM | 170 | H38 | OCB | X | 4 | 22.370 | 27.631 | 33.602 | 1.00 | 0.00 | H |
| ATOM | 171 | H39 | OCB | X | 4 | 14.236 | 23.204 | 37.721 | 1.00 | 0.00 | H |
| ATOM | 172 | H40 | OCB | X | 4 | 15.674 | 20.513 | 34.603 | 1.00 | 0.00 | H |
| ATOM | 173 | H41 | OCB | X | 4 | 15.519 | 24.768 | 33.949 | 1.00 | 0.00 | H |
| ATOM | 174 | H42 | OCB | X | 4 | 20.197 | 17.053 | 38.624 | 1.00 | 0.00 | H |
| ATOM | 175 | H43 | OCB | X | 4 | 18.035 | 17.646 | 34.957 | 1.00 | 0.00 | H |
| ATOM | 176 | H44 | OCB | X | 4 | 22.310 | 18.183 | 35.104 | 1.00 | 0.00 | H |
| ATOM | 177 | H45 | OCB | X | 4 | 16.001 | 29.882 | 34.329 | 1.00 | 0.00 | H |

|      |     |     |     |   |   |        |        |        |      |      |   |
|------|-----|-----|-----|---|---|--------|--------|--------|------|------|---|
| ATOM | 178 | H46 | OCB | X | 4 | 13.253 | 26.612 | 34.489 | 1.00 | 0.00 | H |
| ATOM | 179 | H47 | OCB | X | 4 | 24.521 | 30.121 | 34.234 | 1.00 | 0.00 | H |
| ATOM | 180 | H48 | OCB | X | 4 | 27.179 | 26.826 | 34.906 | 1.00 | 0.00 | H |
| ATOM | 181 | H49 | OCB | X | 4 | 15.976 | 15.695 | 36.425 | 1.00 | 0.00 | H |
| ATOM | 182 | H50 | OCB | X | 4 | 13.181 | 18.984 | 36.088 | 1.00 | 0.00 | H |
| ATOM | 183 | H51 | OCB | X | 4 | 24.107 | 16.229 | 36.049 | 1.00 | 0.00 | H |
| ATOM | 184 | H52 | OCB | X | 4 | 27.339 | 19.077 | 36.197 | 1.00 | 0.00 | H |
| ATOM | 185 | H53 | OCB | X | 4 | 22.853 | 20.828 | 37.552 | 1.00 | 0.00 | H |
| ATOM | 186 | H54 | OCB | X | 4 | 22.597 | 19.593 | 38.846 | 1.00 | 0.00 | H |
| ATOM | 187 | H55 | OCB | X | 4 | 23.882 | 20.798 | 38.963 | 1.00 | 0.00 | H |
| ATOM | 188 | H56 | OCB | X | 4 | 23.468 | 26.378 | 38.009 | 1.00 | 0.00 | H |
| ATOM | 189 | H57 | OCB | X | 4 | 22.348 | 27.634 | 37.475 | 1.00 | 0.00 | H |
| ATOM | 190 | H58 | OCB | X | 4 | 22.353 | 25.996 | 36.670 | 1.00 | 0.00 | H |
| ATOM | 191 | H59 | OCB | X | 4 | 16.673 | 25.381 | 37.592 | 1.00 | 0.00 | H |
| ATOM | 192 | H60 | OCB | X | 4 | 18.104 | 25.932 | 36.686 | 1.00 | 0.00 | H |
| ATOM | 193 | H61 | OCB | X | 4 | 17.444 | 26.893 | 37.975 | 1.00 | 0.00 | H |
| ATOM | 194 | H62 | OCB | X | 4 | 17.608 | 20.634 | 37.015 | 1.00 | 0.00 | H |
| ATOM | 195 | H63 | OCB | X | 4 | 16.991 | 20.645 | 38.655 | 1.00 | 0.00 | H |
| ATOM | 196 | H64 | OCB | X | 4 | 18.261 | 19.534 | 38.183 | 1.00 | 0.00 | H |
| ATOM | 197 | C1  | MOL | X | 5 | 19.085 | 23.161 | 37.149 | 1.00 | 0.00 | C |
| ATOM | 198 | C2  | MOL | X | 5 | 19.077 | 23.013 | 35.799 | 1.00 | 0.00 | C |
| ATOM | 199 | C3  | MOL | X | 5 | 20.320 | 22.883 | 35.137 | 1.00 | 0.00 | C |
| ATOM | 200 | C4  | MOL | X | 5 | 21.494 | 23.061 | 35.862 | 1.00 | 0.00 | C |
| ATOM | 201 | C5  | MOL | X | 5 | 21.501 | 23.252 | 37.227 | 1.00 | 0.00 | C |
| ATOM | 202 | C6  | MOL | X | 5 | 20.283 | 23.390 | 37.896 | 1.00 | 0.00 | C |
| ATOM | 203 | C7  | MOL | X | 5 | 20.213 | 22.632 | 33.730 | 1.00 | 0.00 | C |
| ATOM | 204 | N1  | MOL | X | 5 | 20.132 | 22.555 | 32.610 | 1.00 | 0.00 | N |
| ATOM | 205 | C8  | MOL | X | 5 | 20.169 | 23.552 | 39.390 | 1.00 | 0.00 | C |
| ATOM | 206 | O1  | MOL | X | 5 | 21.179 | 23.533 | 40.047 | 1.00 | 0.00 | O |
| ATOM | 207 | O2  | MOL | X | 5 | 19.064 | 23.627 | 39.896 | 1.00 | 0.00 | O |
| ATOM | 208 | H1  | MOL | X | 5 | 18.142 | 23.140 | 37.690 | 1.00 | 0.00 | H |
| ATOM | 209 | H2  | MOL | X | 5 | 18.164 | 22.886 | 35.223 | 1.00 | 0.00 | H |
| ATOM | 210 | H3  | MOL | X | 5 | 22.362 | 22.928 | 35.221 | 1.00 | 0.00 | H |
| ATOM | 211 | H4  | MOL | X | 5 | 22.375 | 23.548 | 37.801 | 1.00 | 0.00 | H |
| END  |     |     |     |   |   |        |        |        |      |      |   |

### OAMe-G3

|      |    |     |     |   |   |        |        |        |      |      |   |
|------|----|-----|-----|---|---|--------|--------|--------|------|------|---|
| ATOM | 1  | C1  | OCB | X | 4 | 20.134 | 22.165 | 30.544 | 1.00 | 0.00 | C |
| ATOM | 2  | C2  | OCB | X | 4 | 22.462 | 20.905 | 31.416 | 1.00 | 0.00 | C |
| ATOM | 3  | C3  | OCB | X | 4 | 20.685 | 21.129 | 29.793 | 1.00 | 0.00 | C |
| ATOM | 4  | C4  | OCB | X | 4 | 20.691 | 22.402 | 31.791 | 1.00 | 0.00 | C |
| ATOM | 5  | C5  | OCB | X | 4 | 21.898 | 21.796 | 32.234 | 1.00 | 0.00 | C |
| ATOM | 6  | C6  | OCB | X | 4 | 21.854 | 20.516 | 30.236 | 1.00 | 0.00 | C |
| ATOM | 7  | O1  | OCB | X | 4 | 23.527 | 20.292 | 32.070 | 1.00 | 0.00 | O |
| ATOM | 8  | C7  | OCB | X | 4 | 22.527 | 19.370 | 29.493 | 1.00 | 0.00 | C |
| ATOM | 9  | C8  | OCB | X | 4 | 23.335 | 19.016 | 32.648 | 1.00 | 0.00 | C |
| ATOM | 10 | O2  | OCB | X | 4 | 23.771 | 18.012 | 31.696 | 1.00 | 0.00 | O |
| ATOM | 11 | C9  | OCB | X | 4 | 22.781 | 17.352 | 31.052 | 1.00 | 0.00 | C |
| ATOM | 12 | C10 | OCB | X | 4 | 22.047 | 17.991 | 30.079 | 1.00 | 0.00 | C |
| ATOM | 13 | C11 | OCB | X | 4 | 21.031 | 17.252 | 29.408 | 1.00 | 0.00 | C |
| ATOM | 14 | C12 | OCB | X | 4 | 22.482 | 16.036 | 31.395 | 1.00 | 0.00 | C |
| ATOM | 15 | C13 | OCB | X | 4 | 20.648 | 15.965 | 29.737 | 1.00 | 0.00 | C |
| ATOM | 16 | C14 | OCB | X | 4 | 21.387 | 15.364 | 30.786 | 1.00 | 0.00 | C |
| ATOM | 17 | O3  | OCB | X | 4 | 20.835 | 14.180 | 31.317 | 1.00 | 0.00 | O |
| ATOM | 18 | C15 | OCB | X | 4 | 19.446 | 15.259 | 29.146 | 1.00 | 0.00 | C |
| ATOM | 19 | C16 | OCB | X | 4 | 18.236 | 15.718 | 29.998 | 1.00 | 0.00 | C |
| ATOM | 20 | C17 | OCB | X | 4 | 17.731 | 14.954 | 31.073 | 1.00 | 0.00 | C |

|      |    |     |     |   |   |        |        |        |      |      |   |
|------|----|-----|-----|---|---|--------|--------|--------|------|------|---|
| ATOM | 21 | C18 | OCB | X | 4 | 19.706 | 14.307 | 32.231 | 1.00 | 0.00 | C |
| ATOM | 22 | O4  | OCB | X | 4 | 18.468 | 13.974 | 31.791 | 1.00 | 0.00 | O |
| ATOM | 23 | O5  | OCB | X | 4 | 20.078 | 23.177 | 32.757 | 1.00 | 0.00 | O |
| ATOM | 24 | C19 | OCB | X | 4 | 18.697 | 22.709 | 30.178 | 1.00 | 0.00 | C |
| ATOM | 25 | C20 | OCB | X | 4 | 17.614 | 21.881 | 30.800 | 1.00 | 0.00 | C |
| ATOM | 26 | O6  | OCB | X | 4 | 17.633 | 23.185 | 32.884 | 1.00 | 0.00 | O |
| ATOM | 27 | C21 | OCB | X | 4 | 17.057 | 22.188 | 32.048 | 1.00 | 0.00 | C |
| ATOM | 28 | C22 | OCB | X | 4 | 16.678 | 15.383 | 31.803 | 1.00 | 0.00 | C |
| ATOM | 29 | C23 | OCB | X | 4 | 15.968 | 16.595 | 31.426 | 1.00 | 0.00 | C |
| ATOM | 30 | C24 | OCB | X | 4 | 15.968 | 21.423 | 32.575 | 1.00 | 0.00 | C |
| ATOM | 31 | C25 | OCB | X | 4 | 15.552 | 20.262 | 31.896 | 1.00 | 0.00 | C |
| ATOM | 32 | O7  | OCB | X | 4 | 14.986 | 17.035 | 32.254 | 1.00 | 0.00 | O |
| ATOM | 33 | O8  | OCB | X | 4 | 14.636 | 19.383 | 32.501 | 1.00 | 0.00 | O |
| ATOM | 34 | C26 | OCB | X | 4 | 15.252 | 18.189 | 33.082 | 1.00 | 0.00 | C |
| ATOM | 35 | C27 | OCB | X | 4 | 17.187 | 20.682 | 30.183 | 1.00 | 0.00 | C |
| ATOM | 36 | C28 | OCB | X | 4 | 16.124 | 19.942 | 30.629 | 1.00 | 0.00 | C |
| ATOM | 37 | C29 | OCB | X | 4 | 17.566 | 16.961 | 29.708 | 1.00 | 0.00 | C |
| ATOM | 38 | C30 | OCB | X | 4 | 15.620 | 18.620 | 29.951 | 1.00 | 0.00 | C |
| ATOM | 39 | C31 | OCB | X | 4 | 16.422 | 17.373 | 30.374 | 1.00 | 0.00 | C |
| ATOM | 40 | C32 | OCB | X | 4 | 18.881 | 22.735 | 33.443 | 1.00 | 0.00 | C |
| ATOM | 41 | C33 | OCB | X | 4 | 19.211 | 15.331 | 27.654 | 1.00 | 0.00 | C |
| ATOM | 42 | C34 | OCB | X | 4 | 20.400 | 14.809 | 26.908 | 1.00 | 0.00 | C |
| ATOM | 43 | C35 | OCB | X | 4 | 20.090 | 14.518 | 25.498 | 1.00 | 0.00 | C |
| ATOM | 44 | O9  | OCB | X | 4 | 19.915 | 15.459 | 24.677 | 1.00 | 0.00 | O |
| ATOM | 45 | C36 | OCB | X | 4 | 22.480 | 19.396 | 27.973 | 1.00 | 0.00 | C |
| ATOM | 46 | C37 | OCB | X | 4 | 23.360 | 20.480 | 27.308 | 1.00 | 0.00 | C |
| ATOM | 47 | C38 | OCB | X | 4 | 23.374 | 20.303 | 25.808 | 1.00 | 0.00 | C |
| ATOM | 48 | O10 | OCB | X | 4 | 22.437 | 20.687 | 25.144 | 1.00 | 0.00 | O |
| ATOM | 49 | C39 | OCB | X | 4 | 18.598 | 23.116 | 28.678 | 1.00 | 0.00 | C |
| ATOM | 50 | C40 | OCB | X | 4 | 17.287 | 23.785 | 28.433 | 1.00 | 0.00 | C |
| ATOM | 51 | C41 | OCB | X | 4 | 17.103 | 24.438 | 27.056 | 1.00 | 0.00 | C |
| ATOM | 52 | O11 | OCB | X | 4 | 16.947 | 23.675 | 26.121 | 1.00 | 0.00 | O |
| ATOM | 53 | C42 | OCB | X | 4 | 15.378 | 18.680 | 28.382 | 1.00 | 0.00 | C |
| ATOM | 54 | C43 | OCB | X | 4 | 14.302 | 19.629 | 27.948 | 1.00 | 0.00 | C |
| ATOM | 55 | C44 | OCB | X | 4 | 14.169 | 19.386 | 26.486 | 1.00 | 0.00 | C |
| ATOM | 56 | O12 | OCB | X | 4 | 13.451 | 18.452 | 26.137 | 1.00 | 0.00 | O |
| ATOM | 57 | C45 | OCB | X | 4 | 24.194 | 18.919 | 33.944 | 1.00 | 0.00 | C |
| ATOM | 58 | C46 | OCB | X | 4 | 25.440 | 18.514 | 36.413 | 1.00 | 0.00 | C |
| ATOM | 59 | C47 | OCB | X | 4 | 24.474 | 17.610 | 34.403 | 1.00 | 0.00 | C |
| ATOM | 60 | C48 | OCB | X | 4 | 24.519 | 20.047 | 34.704 | 1.00 | 0.00 | C |
| ATOM | 61 | C49 | OCB | X | 4 | 25.031 | 19.801 | 35.958 | 1.00 | 0.00 | C |
| ATOM | 62 | C50 | OCB | X | 4 | 25.122 | 17.424 | 35.641 | 1.00 | 0.00 | C |
| ATOM | 63 | C51 | OCB | X | 4 | 19.011 | 23.128 | 34.984 | 1.00 | 0.00 | C |
| ATOM | 64 | C52 | OCB | X | 4 | 19.383 | 23.738 | 37.751 | 1.00 | 0.00 | C |
| ATOM | 65 | C53 | OCB | X | 4 | 17.941 | 22.991 | 35.867 | 1.00 | 0.00 | C |
| ATOM | 66 | C54 | OCB | X | 4 | 20.223 | 23.541 | 35.491 | 1.00 | 0.00 | C |
| ATOM | 67 | C55 | OCB | X | 4 | 20.415 | 23.805 | 36.903 | 1.00 | 0.00 | C |
| ATOM | 68 | C56 | OCB | X | 4 | 18.091 | 23.382 | 37.182 | 1.00 | 0.00 | C |
| ATOM | 69 | C57 | OCB | X | 4 | 14.847 | 17.930 | 34.557 | 1.00 | 0.00 | C |
| ATOM | 70 | C58 | OCB | X | 4 | 14.007 | 17.548 | 37.202 | 1.00 | 0.00 | C |
| ATOM | 71 | C59 | OCB | X | 4 | 14.893 | 16.621 | 35.166 | 1.00 | 0.00 | C |
| ATOM | 72 | C60 | OCB | X | 4 | 14.515 | 19.014 | 35.371 | 1.00 | 0.00 | C |
| ATOM | 73 | C61 | OCB | X | 4 | 14.052 | 18.865 | 36.649 | 1.00 | 0.00 | C |
| ATOM | 74 | C62 | OCB | X | 4 | 14.453 | 16.468 | 36.512 | 1.00 | 0.00 | C |
| ATOM | 75 | C63 | OCB | X | 4 | 19.948 | 13.455 | 33.512 | 1.00 | 0.00 | C |
| ATOM | 76 | C64 | OCB | X | 4 | 20.377 | 12.109 | 36.006 | 1.00 | 0.00 | C |
| ATOM | 77 | C65 | OCB | X | 4 | 18.900 | 13.142 | 34.429 | 1.00 | 0.00 | C |
| ATOM | 78 | C66 | OCB | X | 4 | 21.191 | 13.168 | 33.979 | 1.00 | 0.00 | C |
| ATOM | 79 | C67 | OCB | X | 4 | 21.414 | 12.449 | 35.224 | 1.00 | 0.00 | C |
| ATOM | 80 | C68 | OCB | X | 4 | 19.140 | 12.523 | 35.661 | 1.00 | 0.00 | C |



|      |     |     |     |   |   |        |        |        |      |      |   |
|------|-----|-----|-----|---|---|--------|--------|--------|------|------|---|
| ATOM | 81  | O13 | OCB | X | 4 | 21.721 | 24.084 | 37.378 | 1.00 | 0.00 | O |
| ATOM | 82  | O14 | OCB | X | 4 | 13.573 | 19.947 | 37.421 | 1.00 | 0.00 | O |
| ATOM | 83  | O15 | OCB | X | 4 | 14.472 | 15.271 | 37.250 | 1.00 | 0.00 | O |
| ATOM | 84  | O16 | OCB | X | 4 | 25.300 | 20.847 | 36.856 | 1.00 | 0.00 | O |
| ATOM | 85  | O17 | OCB | X | 4 | 25.562 | 16.231 | 36.197 | 1.00 | 0.00 | O |
| ATOM | 86  | O18 | OCB | X | 4 | 18.110 | 12.226 | 36.569 | 1.00 | 0.00 | O |
| ATOM | 87  | O19 | OCB | X | 4 | 22.740 | 12.267 | 35.645 | 1.00 | 0.00 | O |
| ATOM | 88  | C69 | OCB | X | 4 | 14.056 | 21.210 | 37.294 | 1.00 | 0.00 | C |
| ATOM | 89  | C70 | OCB | X | 4 | 14.811 | 23.846 | 36.985 | 1.00 | 0.00 | C |
| ATOM | 90  | C71 | OCB | X | 4 | 15.340 | 21.578 | 37.731 | 1.00 | 0.00 | C |
| ATOM | 91  | C72 | OCB | X | 4 | 13.111 | 22.142 | 36.726 | 1.00 | 0.00 | C |
| ATOM | 92  | C73 | OCB | X | 4 | 13.498 | 23.482 | 36.578 | 1.00 | 0.00 | C |
| ATOM | 93  | C74 | OCB | X | 4 | 15.725 | 22.924 | 37.578 | 1.00 | 0.00 | C |
| ATOM | 94  | O20 | OCB | X | 4 | 16.939 | 23.332 | 37.996 | 1.00 | 0.00 | O |
| ATOM | 95  | C75 | OCB | X | 4 | 24.701 | 22.077 | 36.713 | 1.00 | 0.00 | C |
| ATOM | 96  | C76 | OCB | X | 4 | 23.659 | 24.627 | 36.311 | 1.00 | 0.00 | C |
| ATOM | 97  | C77 | OCB | X | 4 | 25.481 | 23.007 | 35.965 | 1.00 | 0.00 | C |
| ATOM | 98  | C78 | OCB | X | 4 | 23.382 | 22.339 | 37.064 | 1.00 | 0.00 | C |
| ATOM | 99  | C79 | OCB | X | 4 | 22.890 | 23.652 | 36.825 | 1.00 | 0.00 | C |
| ATOM | 100 | C80 | OCB | X | 4 | 24.943 | 24.351 | 35.826 | 1.00 | 0.00 | C |
| ATOM | 101 | C81 | OCB | X | 4 | 14.977 | 14.125 | 36.618 | 1.00 | 0.00 | C |
| ATOM | 102 | C82 | OCB | X | 4 | 16.039 | 11.755 | 35.589 | 1.00 | 0.00 | C |
| ATOM | 103 | C83 | OCB | X | 4 | 14.218 | 13.358 | 35.730 | 1.00 | 0.00 | C |
| ATOM | 104 | C84 | OCB | X | 4 | 16.316 | 13.772 | 36.868 | 1.00 | 0.00 | C |
| ATOM | 105 | C85 | OCB | X | 4 | 16.820 | 12.599 | 36.361 | 1.00 | 0.00 | C |
| ATOM | 106 | C86 | OCB | X | 4 | 14.701 | 12.111 | 35.252 | 1.00 | 0.00 | C |
| ATOM | 107 | C87 | OCB | X | 4 | 13.840 | 11.174 | 34.531 | 1.00 | 0.00 | C |
| ATOM | 108 | O21 | OCB | X | 4 | 12.636 | 11.410 | 34.463 | 1.00 | 0.00 | O |
| ATOM | 109 | C88 | OCB | X | 4 | 26.704 | 12.749 | 32.828 | 1.00 | 0.00 | C |
| ATOM | 110 | O22 | OCB | X | 4 | 27.668 | 13.278 | 32.544 | 1.00 | 0.00 | O |
| ATOM | 111 | C89 | OCB | X | 4 | 25.795 | 25.382 | 35.102 | 1.00 | 0.00 | C |
| ATOM | 112 | O23 | OCB | X | 4 | 25.420 | 26.494 | 35.183 | 1.00 | 0.00 | O |
| ATOM | 113 | O24 | OCB | X | 4 | 19.806 | 13.407 | 25.172 | 1.00 | 0.00 | O |
| ATOM | 114 | O25 | OCB | X | 4 | 14.774 | 20.055 | 25.649 | 1.00 | 0.00 | O |
| ATOM | 115 | O26 | OCB | X | 4 | 17.214 | 25.649 | 26.869 | 1.00 | 0.00 | O |
| ATOM | 116 | C90 | OCB | X | 4 | 12.680 | 24.476 | 35.855 | 1.00 | 0.00 | C |
| ATOM | 117 | O27 | OCB | X | 4 | 12.963 | 25.653 | 35.940 | 1.00 | 0.00 | O |
| ATOM | 118 | O28 | OCB | X | 4 | 26.380 | 11.694 | 32.230 | 1.00 | 0.00 | O |
| ATOM | 119 | O29 | OCB | X | 4 | 14.272 | 10.094 | 34.186 | 1.00 | 0.00 | O |
| ATOM | 120 | O30 | OCB | X | 4 | 11.755 | 24.132 | 35.147 | 1.00 | 0.00 | O |
| ATOM | 121 | O31 | OCB | X | 4 | 26.817 | 25.129 | 34.546 | 1.00 | 0.00 | O |
| ATOM | 122 | O32 | OCB | X | 4 | 24.294 | 19.727 | 25.326 | 1.00 | 0.00 | O |
| ATOM | 123 | C91 | OCB | X | 4 | 25.335 | 14.954 | 35.631 | 1.00 | 0.00 | C |
| ATOM | 124 | C92 | OCB | X | 4 | 24.731 | 12.543 | 34.344 | 1.00 | 0.00 | C |
| ATOM | 125 | C93 | OCB | X | 4 | 24.162 | 14.238 | 36.029 | 1.00 | 0.00 | C |
| ATOM | 126 | C94 | OCB | X | 4 | 26.027 | 14.551 | 34.490 | 1.00 | 0.00 | C |
| ATOM | 127 | C95 | OCB | X | 4 | 25.773 | 13.297 | 33.886 | 1.00 | 0.00 | C |
| ATOM | 128 | C96 | OCB | X | 4 | 23.838 | 13.043 | 35.319 | 1.00 | 0.00 | C |
| ATOM | 129 | C97 | OCB | X | 4 | 23.315 | 14.536 | 37.220 | 1.00 | 0.00 | C |
| ATOM | 130 | C98 | OCB | X | 4 | 22.511 | 21.373 | 37.747 | 1.00 | 0.00 | C |
| ATOM | 131 | C99 | OCB | X | 4 | 16.351 | 20.574 | 38.307 | 1.00 | 0.00 | C |
| ATOM | 132 | C   | OCB | X | 4 | 17.155 | 14.712 | 37.787 | 1.00 | 0.00 | C |
| ATOM | 133 | H1  | OCB | X | 4 | 20.197 | 20.745 | 28.901 | 1.00 | 0.00 | H |
| ATOM | 134 | H2  | OCB | X | 4 | 22.358 | 21.991 | 33.199 | 1.00 | 0.00 | H |
| ATOM | 135 | H3  | OCB | X | 4 | 23.600 | 19.458 | 29.672 | 1.00 | 0.00 | H |
| ATOM | 136 | H4  | OCB | X | 4 | 22.317 | 18.842 | 33.027 | 1.00 | 0.00 | H |
| ATOM | 137 | H5  | OCB | X | 4 | 20.442 | 17.610 | 28.567 | 1.00 | 0.00 | H |
| ATOM | 138 | H6  | OCB | X | 4 | 23.063 | 15.560 | 32.181 | 1.00 | 0.00 | H |
| ATOM | 139 | H7  | OCB | X | 4 | 19.374 | 14.184 | 29.322 | 1.00 | 0.00 | H |
| ATOM | 140 | H8  | OCB | X | 4 | 19.606 | 15.337 | 32.603 | 1.00 | 0.00 | H |

|      |     |     |     |   |   |        |        |        |      |      |   |
|------|-----|-----|-----|---|---|--------|--------|--------|------|------|---|
| ATOM | 141 | H9  | OCB | X | 4 | 18.642 | 23.663 | 30.708 | 1.00 | 0.00 | H |
| ATOM | 142 | H10 | OCB | X | 4 | 16.297 | 14.796 | 32.635 | 1.00 | 0.00 | H |
| ATOM | 143 | H11 | OCB | X | 4 | 15.622 | 21.629 | 33.584 | 1.00 | 0.00 | H |
| ATOM | 144 | H12 | OCB | X | 4 | 16.335 | 18.369 | 33.158 | 1.00 | 0.00 | H |
| ATOM | 145 | H13 | OCB | X | 4 | 17.751 | 20.299 | 29.335 | 1.00 | 0.00 | H |
| ATOM | 146 | H14 | OCB | X | 4 | 17.955 | 17.574 | 28.899 | 1.00 | 0.00 | H |
| ATOM | 147 | H15 | OCB | X | 4 | 14.579 | 18.510 | 30.262 | 1.00 | 0.00 | H |
| ATOM | 148 | H16 | OCB | X | 4 | 18.951 | 21.643 | 33.329 | 1.00 | 0.00 | H |
| ATOM | 149 | H17 | OCB | X | 4 | 18.327 | 14.786 | 27.318 | 1.00 | 0.00 | H |
| ATOM | 150 | H18 | OCB | X | 4 | 19.123 | 16.397 | 27.432 | 1.00 | 0.00 | H |
| ATOM | 151 | H19 | OCB | X | 4 | 21.134 | 15.617 | 26.945 | 1.00 | 0.00 | H |
| ATOM | 152 | H20 | OCB | X | 4 | 20.915 | 13.935 | 27.312 | 1.00 | 0.00 | H |
| ATOM | 153 | H21 | OCB | X | 4 | 21.454 | 19.459 | 27.604 | 1.00 | 0.00 | H |
| ATOM | 154 | H22 | OCB | X | 4 | 22.809 | 18.483 | 27.471 | 1.00 | 0.00 | H |
| ATOM | 155 | H23 | OCB | X | 4 | 23.090 | 21.454 | 27.723 | 1.00 | 0.00 | H |
| ATOM | 156 | H24 | OCB | X | 4 | 24.395 | 20.410 | 27.649 | 1.00 | 0.00 | H |
| ATOM | 157 | H25 | OCB | X | 4 | 19.399 | 23.818 | 28.435 | 1.00 | 0.00 | H |
| ATOM | 158 | H26 | OCB | X | 4 | 18.631 | 22.211 | 28.069 | 1.00 | 0.00 | H |
| ATOM | 159 | H27 | OCB | X | 4 | 16.534 | 22.997 | 28.506 | 1.00 | 0.00 | H |
| ATOM | 160 | H28 | OCB | X | 4 | 17.042 | 24.499 | 29.221 | 1.00 | 0.00 | H |
| ATOM | 161 | H29 | OCB | X | 4 | 16.367 | 18.847 | 27.950 | 1.00 | 0.00 | H |
| ATOM | 162 | H30 | OCB | X | 4 | 15.026 | 17.664 | 28.193 | 1.00 | 0.00 | H |
| ATOM | 163 | H31 | OCB | X | 4 | 13.368 | 19.432 | 28.479 | 1.00 | 0.00 | H |
| ATOM | 164 | H32 | OCB | X | 4 | 14.573 | 20.668 | 28.146 | 1.00 | 0.00 | H |
| ATOM | 165 | H33 | OCB | X | 4 | 25.882 | 18.426 | 37.402 | 1.00 | 0.00 | H |
| ATOM | 166 | H34 | OCB | X | 4 | 24.079 | 16.745 | 33.876 | 1.00 | 0.00 | H |
| ATOM | 167 | H35 | OCB | X | 4 | 24.421 | 21.061 | 34.323 | 1.00 | 0.00 | H |
| ATOM | 168 | H36 | OCB | X | 4 | 19.524 | 23.903 | 38.816 | 1.00 | 0.00 | H |
| ATOM | 169 | H37 | OCB | X | 4 | 16.965 | 22.769 | 35.441 | 1.00 | 0.00 | H |
| ATOM | 170 | H38 | OCB | X | 4 | 21.047 | 23.656 | 34.791 | 1.00 | 0.00 | H |
| ATOM | 171 | H39 | OCB | X | 4 | 13.624 | 17.444 | 38.214 | 1.00 | 0.00 | H |
| ATOM | 172 | H40 | OCB | X | 4 | 15.066 | 15.773 | 34.509 | 1.00 | 0.00 | H |
| ATOM | 173 | H41 | OCB | X | 4 | 14.628 | 20.030 | 34.999 | 1.00 | 0.00 | H |
| ATOM | 174 | H42 | OCB | X | 4 | 20.603 | 11.645 | 36.962 | 1.00 | 0.00 | H |
| ATOM | 175 | H43 | OCB | X | 4 | 17.867 | 13.415 | 34.227 | 1.00 | 0.00 | H |
| ATOM | 176 | H44 | OCB | X | 4 | 22.040 | 13.603 | 33.459 | 1.00 | 0.00 | H |
| ATOM | 177 | H45 | OCB | X | 4 | 15.145 | 24.868 | 36.827 | 1.00 | 0.00 | H |
| ATOM | 178 | H46 | OCB | X | 4 | 12.103 | 21.833 | 36.459 | 1.00 | 0.00 | H |
| ATOM | 179 | H47 | OCB | X | 4 | 23.185 | 25.605 | 36.317 | 1.00 | 0.00 | H |
| ATOM | 180 | H48 | OCB | X | 4 | 26.514 | 22.743 | 35.752 | 1.00 | 0.00 | H |
| ATOM | 181 | H49 | OCB | X | 4 | 16.424 | 10.784 | 35.288 | 1.00 | 0.00 | H |
| ATOM | 182 | H50 | OCB | X | 4 | 13.215 | 13.747 | 35.573 | 1.00 | 0.00 | H |
| ATOM | 183 | H51 | OCB | X | 4 | 24.399 | 11.606 | 33.904 | 1.00 | 0.00 | H |
| ATOM | 184 | H52 | OCB | X | 4 | 26.782 | 15.183 | 34.029 | 1.00 | 0.00 | H |
| ATOM | 185 | H53 | OCB | X | 4 | 23.282 | 13.684 | 37.902 | 1.00 | 0.00 | H |
| ATOM | 186 | H54 | OCB | X | 4 | 23.672 | 15.405 | 37.777 | 1.00 | 0.00 | H |
| ATOM | 187 | H55 | OCB | X | 4 | 22.283 | 14.793 | 36.972 | 1.00 | 0.00 | H |
| ATOM | 188 | H56 | OCB | X | 4 | 21.984 | 21.667 | 38.656 | 1.00 | 0.00 | H |
| ATOM | 189 | H57 | OCB | X | 4 | 21.703 | 20.983 | 37.125 | 1.00 | 0.00 | H |
| ATOM | 190 | H58 | OCB | X | 4 | 23.070 | 20.500 | 38.091 | 1.00 | 0.00 | H |
| ATOM | 191 | H59 | OCB | X | 4 | 15.693 | 19.858 | 38.803 | 1.00 | 0.00 | H |
| ATOM | 192 | H60 | OCB | X | 4 | 16.856 | 20.277 | 37.385 | 1.00 | 0.00 | H |
| ATOM | 193 | H61 | OCB | X | 4 | 17.018 | 21.041 | 39.035 | 1.00 | 0.00 | H |
| ATOM | 194 | H62 | OCB | X | 4 | 16.699 | 15.702 | 37.851 | 1.00 | 0.00 | H |
| ATOM | 195 | H63 | OCB | X | 4 | 17.278 | 14.158 | 38.720 | 1.00 | 0.00 | H |
| ATOM | 196 | H64 | OCB | X | 4 | 18.061 | 14.895 | 37.206 | 1.00 | 0.00 | H |
| ATOM | 197 | C1  | MOL | X | 5 | 19.074 | 18.629 | 32.615 | 1.00 | 0.00 | C |
| ATOM | 198 | C2  | MOL | X | 5 | 19.497 | 19.215 | 34.012 | 1.00 | 0.00 | C |
| ATOM | 199 | C3  | MOL | X | 5 | 19.982 | 18.148 | 34.860 | 1.00 | 0.00 | C |
| ATOM | 200 | C4  | MOL | X | 5 | 19.859 | 18.594 | 36.370 | 1.00 | 0.00 | C |

|      |     |     |     |   |   |        |        |        |      |      |   |
|------|-----|-----|-----|---|---|--------|--------|--------|------|------|---|
| ATOM | 201 | C5  | MOL | X | 5 | 20.342 | 17.504 | 37.322 | 1.00 | 0.00 | C |
| ATOM | 202 | C6  | MOL | X | 5 | 20.044 | 17.936 | 38.813 | 1.00 | 0.00 | C |
| ATOM | 203 | N1  | MOL | X | 5 | 20.462 | 16.998 | 39.918 | 1.00 | 0.00 | N |
| ATOM | 204 | C7  | MOL | X | 5 | 21.959 | 16.917 | 40.124 | 1.00 | 0.00 | C |
| ATOM | 205 | C8  | MOL | X | 5 | 19.977 | 15.621 | 39.635 | 1.00 | 0.00 | C |
| ATOM | 206 | C9  | MOL | X | 5 | 19.777 | 17.492 | 41.152 | 1.00 | 0.00 | C |
| ATOM | 207 | H1  | MOL | X | 5 | 18.341 | 19.325 | 32.202 | 1.00 | 0.00 | H |
| ATOM | 208 | H2  | MOL | X | 5 | 19.931 | 18.526 | 31.946 | 1.00 | 0.00 | H |
| ATOM | 209 | H3  | MOL | X | 5 | 18.593 | 19.582 | 34.503 | 1.00 | 0.00 | H |
| ATOM | 210 | H4  | MOL | X | 5 | 20.213 | 20.040 | 34.028 | 1.00 | 0.00 | H |
| ATOM | 211 | H5  | MOL | X | 5 | 20.960 | 17.874 | 34.460 | 1.00 | 0.00 | H |
| ATOM | 212 | H6  | MOL | X | 5 | 19.330 | 17.272 | 34.876 | 1.00 | 0.00 | H |
| ATOM | 213 | H7  | MOL | X | 5 | 18.831 | 18.861 | 36.625 | 1.00 | 0.00 | H |
| ATOM | 214 | H8  | MOL | X | 5 | 20.489 | 19.476 | 36.497 | 1.00 | 0.00 | H |
| ATOM | 215 | H9  | MOL | X | 5 | 21.432 | 17.536 | 37.276 | 1.00 | 0.00 | H |
| ATOM | 216 | H10 | MOL | X | 5 | 19.960 | 16.504 | 37.105 | 1.00 | 0.00 | H |
| ATOM | 217 | H11 | MOL | X | 5 | 18.971 | 18.126 | 38.856 | 1.00 | 0.00 | H |
| ATOM | 218 | H12 | MOL | X | 5 | 20.531 | 18.881 | 39.056 | 1.00 | 0.00 | H |
| ATOM | 219 | H13 | MOL | X | 5 | 18.557 | 17.667 | 32.597 | 1.00 | 0.00 | H |
| ATOM | 220 | H14 | MOL | X | 5 | 22.448 | 16.397 | 39.300 | 1.00 | 0.00 | H |
| ATOM | 221 | H15 | MOL | X | 5 | 22.355 | 17.912 | 40.331 | 1.00 | 0.00 | H |
| ATOM | 222 | H16 | MOL | X | 5 | 22.066 | 16.275 | 41.000 | 1.00 | 0.00 | H |
| ATOM | 223 | H17 | MOL | X | 5 | 20.284 | 14.899 | 40.392 | 1.00 | 0.00 | H |
| ATOM | 224 | H18 | MOL | X | 5 | 18.891 | 15.629 | 39.533 | 1.00 | 0.00 | H |
| ATOM | 225 | H19 | MOL | X | 5 | 20.341 | 15.369 | 38.638 | 1.00 | 0.00 | H |
| ATOM | 226 | H20 | MOL | X | 5 | 20.307 | 18.436 | 41.289 | 1.00 | 0.00 | H |
| ATOM | 227 | H21 | MOL | X | 5 | 18.701 | 17.616 | 41.016 | 1.00 | 0.00 | H |
| ATOM | 228 | H22 | MOL | X | 5 | 20.068 | 16.830 | 41.968 | 1.00 | 0.00 | H |
| END  |     |     |     |   |   |        |        |        |      |      |   |

## OAMe-G4

|      |    |     |     |   |   |        |        |        |      |      |   |
|------|----|-----|-----|---|---|--------|--------|--------|------|------|---|
| ATOM | 1  | C1  | OCB | X | 4 | 21.059 | 17.850 | 26.407 | 1.00 | 0.00 | C |
| ATOM | 2  | C2  | OCB | X | 4 | 19.737 | 15.742 | 27.463 | 1.00 | 0.00 | C |
| ATOM | 3  | C3  | OCB | X | 4 | 19.924 | 17.308 | 25.727 | 1.00 | 0.00 | C |
| ATOM | 4  | C4  | OCB | X | 4 | 21.469 | 17.380 | 27.605 | 1.00 | 0.00 | C |
| ATOM | 5  | C5  | OCB | X | 4 | 20.742 | 16.315 | 28.137 | 1.00 | 0.00 | C |
| ATOM | 6  | C6  | OCB | X | 4 | 19.304 | 16.153 | 26.192 | 1.00 | 0.00 | C |
| ATOM | 7  | O1  | OCB | X | 4 | 19.216 | 14.586 | 28.057 | 1.00 | 0.00 | O |
| ATOM | 8  | C7  | OCB | X | 4 | 18.127 | 15.426 | 25.568 | 1.00 | 0.00 | C |
| ATOM | 9  | C8  | OCB | X | 4 | 17.989 | 14.703 | 28.677 | 1.00 | 0.00 | C |
| ATOM | 10 | O2  | OCB | X | 4 | 16.877 | 14.406 | 27.875 | 1.00 | 0.00 | O |
| ATOM | 11 | C9  | OCB | X | 4 | 16.256 | 15.428 | 27.274 | 1.00 | 0.00 | C |
| ATOM | 12 | C10 | OCB | X | 4 | 16.844 | 16.032 | 26.169 | 1.00 | 0.00 | C |
| ATOM | 13 | C11 | OCB | X | 4 | 16.277 | 17.153 | 25.588 | 1.00 | 0.00 | C |
| ATOM | 14 | C12 | OCB | X | 4 | 15.051 | 15.852 | 27.734 | 1.00 | 0.00 | C |
| ATOM | 15 | C13 | OCB | X | 4 | 15.069 | 17.610 | 26.061 | 1.00 | 0.00 | C |
| ATOM | 16 | C14 | OCB | X | 4 | 14.428 | 16.916 | 27.136 | 1.00 | 0.00 | C |
| ATOM | 17 | O3  | OCB | X | 4 | 13.428 | 17.551 | 27.854 | 1.00 | 0.00 | O |
| ATOM | 18 | C15 | OCB | X | 4 | 14.559 | 18.907 | 25.534 | 1.00 | 0.00 | C |
| ATOM | 19 | C16 | OCB | X | 4 | 15.212 | 20.053 | 26.206 | 1.00 | 0.00 | C |
| ATOM | 20 | C17 | OCB | X | 4 | 14.724 | 20.443 | 27.500 | 1.00 | 0.00 | C |
| ATOM | 21 | C18 | OCB | X | 4 | 13.857 | 18.599 | 28.799 | 1.00 | 0.00 | C |
| ATOM | 22 | O4  | OCB | X | 4 | 13.651 | 19.823 | 28.130 | 1.00 | 0.00 | O |
| ATOM | 23 | O5  | OCB | X | 4 | 22.479 | 17.913 | 28.364 | 1.00 | 0.00 | O |
| ATOM | 24 | C19 | OCB | X | 4 | 21.745 | 19.070 | 25.842 | 1.00 | 0.00 | C |
| ATOM | 25 | C20 | OCB | X | 4 | 21.040 | 20.305 | 26.452 | 1.00 | 0.00 | C |
| ATOM | 26 | O6  | OCB | X | 4 | 22.537 | 20.294 | 28.365 | 1.00 | 0.00 | O |

|      |    |     |     |   |   |        |        |        |      |      |   |
|------|----|-----|-----|---|---|--------|--------|--------|------|------|---|
| ATOM | 27 | C21 | OCB | X | 4 | 21.552 | 20.861 | 27.636 | 1.00 | 0.00 | C |
| ATOM | 28 | C22 | OCB | X | 4 | 15.306 | 21.512 | 28.212 | 1.00 | 0.00 | C |
| ATOM | 29 | C23 | OCB | X | 4 | 16.398 | 22.116 | 27.638 | 1.00 | 0.00 | C |
| ATOM | 30 | C24 | OCB | X | 4 | 20.948 | 21.908 | 28.209 | 1.00 | 0.00 | C |
| ATOM | 31 | C25 | OCB | X | 4 | 19.821 | 22.462 | 27.624 | 1.00 | 0.00 | C |
| ATOM | 32 | O7  | OCB | X | 4 | 16.882 | 23.228 | 28.310 | 1.00 | 0.00 | O |
| ATOM | 33 | O8  | OCB | X | 4 | 19.172 | 23.489 | 28.285 | 1.00 | 0.00 | O |
| ATOM | 34 | C26 | OCB | X | 4 | 18.115 | 23.022 | 29.087 | 1.00 | 0.00 | C |
| ATOM | 35 | C27 | OCB | X | 4 | 19.906 | 20.818 | 25.862 | 1.00 | 0.00 | C |
| ATOM | 36 | C28 | OCB | X | 4 | 19.305 | 21.949 | 26.425 | 1.00 | 0.00 | C |
| ATOM | 37 | C29 | OCB | X | 4 | 16.253 | 20.756 | 25.655 | 1.00 | 0.00 | C |
| ATOM | 38 | C30 | OCB | X | 4 | 18.048 | 22.611 | 25.839 | 1.00 | 0.00 | C |
| ATOM | 39 | C31 | OCB | X | 4 | 16.820 | 21.851 | 26.316 | 1.00 | 0.00 | C |
| ATOM | 40 | C32 | OCB | X | 4 | 22.217 | 19.108 | 29.166 | 1.00 | 0.00 | C |
| ATOM | 41 | C33 | OCB | X | 4 | 14.516 | 19.156 | 24.015 | 1.00 | 0.00 | C |
| ATOM | 42 | C34 | OCB | X | 4 | 13.542 | 18.230 | 23.195 | 1.00 | 0.00 | C |
| ATOM | 43 | C35 | OCB | X | 4 | 13.262 | 18.747 | 21.773 | 1.00 | 0.00 | C |
| ATOM | 44 | O9  | OCB | X | 4 | 13.825 | 18.366 | 20.741 | 1.00 | 0.00 | O |
| ATOM | 45 | C36 | OCB | X | 4 | 18.142 | 15.513 | 24.005 | 1.00 | 0.00 | C |
| ATOM | 46 | C37 | OCB | X | 4 | 19.048 | 14.501 | 23.362 | 1.00 | 0.00 | C |
| ATOM | 47 | C38 | OCB | X | 4 | 18.776 | 14.289 | 21.869 | 1.00 | 0.00 | C |
| ATOM | 48 | O10 | OCB | X | 4 | 17.833 | 13.548 | 21.600 | 1.00 | 0.00 | O |
| ATOM | 49 | C39 | OCB | X | 4 | 22.043 | 19.013 | 24.349 | 1.00 | 0.00 | C |
| ATOM | 50 | C40 | OCB | X | 4 | 22.819 | 20.240 | 23.755 | 1.00 | 0.00 | C |
| ATOM | 51 | C41 | OCB | X | 4 | 23.660 | 20.008 | 22.533 | 1.00 | 0.00 | C |
| ATOM | 52 | O11 | OCB | X | 4 | 23.359 | 19.189 | 21.695 | 1.00 | 0.00 | O |
| ATOM | 53 | C42 | OCB | X | 4 | 18.066 | 22.655 | 24.290 | 1.00 | 0.00 | C |
| ATOM | 54 | C43 | OCB | X | 4 | 19.159 | 23.664 | 23.849 | 1.00 | 0.00 | C |
| ATOM | 55 | C44 | OCB | X | 4 | 19.078 | 24.066 | 22.377 | 1.00 | 0.00 | C |
| ATOM | 56 | O12 | OCB | X | 4 | 19.506 | 23.414 | 21.483 | 1.00 | 0.00 | O |
| ATOM | 57 | C45 | OCB | X | 4 | 17.867 | 14.012 | 30.014 | 1.00 | 0.00 | C |
| ATOM | 58 | C46 | OCB | X | 4 | 17.804 | 12.854 | 32.612 | 1.00 | 0.00 | C |
| ATOM | 59 | C47 | OCB | X | 4 | 16.669 | 13.501 | 30.514 | 1.00 | 0.00 | C |
| ATOM | 60 | C48 | OCB | X | 4 | 18.981 | 13.944 | 30.797 | 1.00 | 0.00 | C |
| ATOM | 61 | C49 | OCB | X | 4 | 19.000 | 13.331 | 32.068 | 1.00 | 0.00 | C |
| ATOM | 62 | C50 | OCB | X | 4 | 16.593 | 12.976 | 31.885 | 1.00 | 0.00 | C |
| ATOM | 63 | C51 | OCB | X | 4 | 22.865 | 19.139 | 30.542 | 1.00 | 0.00 | C |
| ATOM | 64 | C52 | OCB | X | 4 | 23.676 | 18.991 | 33.220 | 1.00 | 0.00 | C |
| ATOM | 65 | C53 | OCB | X | 4 | 22.962 | 20.326 | 31.280 | 1.00 | 0.00 | C |
| ATOM | 66 | C54 | OCB | X | 4 | 23.269 | 17.920 | 31.101 | 1.00 | 0.00 | C |
| ATOM | 67 | C55 | OCB | X | 4 | 23.622 | 17.856 | 32.462 | 1.00 | 0.00 | C |
| ATOM | 68 | C56 | OCB | X | 4 | 23.332 | 20.237 | 32.609 | 1.00 | 0.00 | C |
| ATOM | 69 | C57 | OCB | X | 4 | 17.944 | 23.829 | 30.393 | 1.00 | 0.00 | C |
| ATOM | 70 | C58 | OCB | X | 4 | 17.519 | 24.489 | 33.049 | 1.00 | 0.00 | C |
| ATOM | 71 | C59 | OCB | X | 4 | 16.653 | 23.896 | 30.872 | 1.00 | 0.00 | C |
| ATOM | 72 | C60 | OCB | X | 4 | 19.022 | 24.134 | 31.189 | 1.00 | 0.00 | C |
| ATOM | 73 | C61 | OCB | X | 4 | 18.808 | 24.430 | 32.531 | 1.00 | 0.00 | C |
| ATOM | 74 | C62 | OCB | X | 4 | 16.435 | 24.256 | 32.206 | 1.00 | 0.00 | C |
| ATOM | 75 | C63 | OCB | X | 4 | 13.010 | 18.541 | 30.082 | 1.00 | 0.00 | C |
| ATOM | 76 | C64 | OCB | X | 4 | 11.729 | 18.470 | 32.526 | 1.00 | 0.00 | C |
| ATOM | 77 | C65 | OCB | X | 4 | 12.671 | 19.756 | 30.721 | 1.00 | 0.00 | C |
| ATOM | 78 | C66 | OCB | X | 4 | 12.728 | 17.371 | 30.706 | 1.00 | 0.00 | C |
| ATOM | 79 | C67 | OCB | X | 4 | 12.168 | 17.298 | 31.928 | 1.00 | 0.00 | C |
| ATOM | 80 | C68 | OCB | X | 4 | 11.988 | 19.711 | 31.937 | 1.00 | 0.00 | C |
| ATOM | 81 | O13 | OCB | X | 4 | 23.791 | 16.592 | 33.075 | 1.00 | 0.00 | O |
| ATOM | 82 | O14 | OCB | X | 4 | 19.890 | 24.581 | 33.443 | 1.00 | 0.00 | O |
| ATOM | 83 | O15 | OCB | X | 4 | 15.214 | 24.080 | 32.809 | 1.00 | 0.00 | O |
| ATOM | 84 | O16 | OCB | X | 4 | 20.209 | 13.175 | 32.724 | 1.00 | 0.00 | O |
| ATOM | 85 | O17 | OCB | X | 4 | 15.418 | 12.620 | 32.456 | 1.00 | 0.00 | O |
| ATOM | 86 | O18 | OCB | X | 4 | 11.576 | 20.852 | 32.571 | 1.00 | 0.00 | O |

|      |     |     |     |   |   |        |        |        |      |      |   |
|------|-----|-----|-----|---|---|--------|--------|--------|------|------|---|
| ATOM | 87  | O19 | OCB | X | 4 | 12.048 | 16.085 | 32.599 | 1.00 | 0.00 | O |
| ATOM | 88  | C69 | OCB | X | 4 | 21.174 | 24.145 | 33.080 | 1.00 | 0.00 | C |
| ATOM | 89  | C70 | OCB | X | 4 | 23.838 | 23.482 | 32.445 | 1.00 | 0.00 | C |
| ATOM | 90  | C71 | OCB | X | 4 | 21.704 | 22.957 | 33.567 | 1.00 | 0.00 | C |
| ATOM | 91  | C72 | OCB | X | 4 | 21.998 | 25.035 | 32.399 | 1.00 | 0.00 | C |
| ATOM | 92  | C73 | OCB | X | 4 | 23.302 | 24.655 | 31.962 | 1.00 | 0.00 | C |
| ATOM | 93  | C74 | OCB | X | 4 | 23.003 | 22.565 | 33.123 | 1.00 | 0.00 | C |
| ATOM | 94  | O20 | OCB | X | 4 | 23.539 | 21.334 | 33.366 | 1.00 | 0.00 | O |
| ATOM | 95  | C75 | OCB | X | 4 | 21.453 | 13.777 | 32.331 | 1.00 | 0.00 | C |
| ATOM | 96  | C76 | OCB | X | 4 | 24.059 | 14.650 | 31.614 | 1.00 | 0.00 | C |
| ATOM | 97  | C77 | OCB | X | 4 | 22.266 | 13.045 | 31.436 | 1.00 | 0.00 | C |
| ATOM | 98  | C78 | OCB | X | 4 | 22.050 | 14.915 | 32.932 | 1.00 | 0.00 | C |
| ATOM | 99  | C79 | OCB | X | 4 | 23.320 | 15.355 | 32.560 | 1.00 | 0.00 | C |
| ATOM | 100 | C80 | OCB | X | 4 | 23.574 | 13.492 | 31.140 | 1.00 | 0.00 | C |
| ATOM | 101 | C81 | OCB | X | 4 | 14.016 | 23.633 | 32.261 | 1.00 | 0.00 | C |
| ATOM | 102 | C82 | OCB | X | 4 | 11.553 | 22.808 | 31.217 | 1.00 | 0.00 | C |
| ATOM | 103 | C83 | OCB | X | 4 | 13.354 | 24.428 | 31.222 | 1.00 | 0.00 | C |
| ATOM | 104 | C84 | OCB | X | 4 | 13.319 | 22.536 | 32.842 | 1.00 | 0.00 | C |
| ATOM | 105 | C85 | OCB | X | 4 | 12.170 | 22.066 | 32.237 | 1.00 | 0.00 | C |
| ATOM | 106 | C86 | OCB | X | 4 | 12.045 | 24.040 | 30.786 | 1.00 | 0.00 | C |
| ATOM | 107 | C87 | OCB | X | 4 | 11.114 | 24.839 | 29.835 | 1.00 | 0.00 | C |
| ATOM | 108 | O21 | OCB | X | 4 | 11.256 | 26.010 | 29.571 | 1.00 | 0.00 | O |
| ATOM | 109 | C88 | OCB | X | 4 | 11.351 | 12.310 | 29.613 | 1.00 | 0.00 | C |
| ATOM | 110 | O22 | OCB | X | 4 | 11.355 | 11.063 | 29.536 | 1.00 | 0.00 | O |
| ATOM | 111 | C89 | OCB | X | 4 | 24.298 | 12.709 | 30.080 | 1.00 | 0.00 | C |
| ATOM | 112 | O23 | OCB | X | 4 | 23.851 | 11.702 | 29.628 | 1.00 | 0.00 | O |
| ATOM | 113 | O24 | OCB | X | 4 | 12.323 | 19.478 | 21.577 | 1.00 | 0.00 | O |
| ATOM | 114 | O25 | OCB | X | 4 | 18.418 | 25.039 | 22.108 | 1.00 | 0.00 | O |
| ATOM | 115 | O26 | OCB | X | 4 | 24.671 | 20.639 | 22.457 | 1.00 | 0.00 | O |
| ATOM | 116 | C90 | OCB | X | 4 | 24.130 | 25.557 | 31.093 | 1.00 | 0.00 | C |
| ATOM | 117 | O27 | OCB | X | 4 | 25.265 | 25.271 | 30.805 | 1.00 | 0.00 | O |
| ATOM | 118 | O28 | OCB | X | 4 | 10.506 | 12.866 | 28.995 | 1.00 | 0.00 | O |
| ATOM | 119 | O29 | OCB | X | 4 | 10.242 | 24.327 | 29.249 | 1.00 | 0.00 | O |
| ATOM | 120 | O30 | OCB | X | 4 | 23.647 | 26.502 | 30.548 | 1.00 | 0.00 | O |
| ATOM | 121 | O31 | OCB | X | 4 | 25.315 | 13.214 | 29.675 | 1.00 | 0.00 | O |
| ATOM | 122 | O32 | OCB | X | 4 | 19.507 | 14.717 | 21.010 | 1.00 | 0.00 | O |
| ATOM | 123 | C91 | OCB | X | 4 | 14.193 | 13.184 | 32.011 | 1.00 | 0.00 | C |
| ATOM | 124 | C92 | OCB | X | 4 | 11.721 | 14.205 | 31.177 | 1.00 | 0.00 | C |
| ATOM | 125 | C93 | OCB | X | 4 | 13.680 | 14.422 | 32.530 | 1.00 | 0.00 | C |
| ATOM | 126 | C94 | OCB | X | 4 | 13.383 | 12.443 | 31.157 | 1.00 | 0.00 | C |
| ATOM | 127 | C95 | OCB | X | 4 | 12.185 | 13.022 | 30.684 | 1.00 | 0.00 | C |
| ATOM | 128 | C96 | OCB | X | 4 | 12.478 | 14.943 | 32.103 | 1.00 | 0.00 | C |
| ATOM | 129 | C97 | OCB | X | 4 | 14.483 | 14.998 | 33.680 | 1.00 | 0.00 | C |
| ATOM | 130 | C98 | OCB | X | 4 | 21.389 | 15.611 | 34.054 | 1.00 | 0.00 | C |
| ATOM | 131 | C99 | OCB | X | 4 | 20.911 | 21.897 | 34.346 | 1.00 | 0.00 | C |
| ATOM | 132 | C   | OCB | X | 4 | 13.826 | 21.958 | 34.203 | 1.00 | 0.00 | C |
| ATOM | 133 | H1  | OCB | X | 4 | 19.402 | 17.826 | 24.927 | 1.00 | 0.00 | H |
| ATOM | 134 | H2  | OCB | X | 4 | 21.118 | 15.865 | 29.053 | 1.00 | 0.00 | H |
| ATOM | 135 | H3  | OCB | X | 4 | 18.221 | 14.378 | 25.863 | 1.00 | 0.00 | H |
| ATOM | 136 | H4  | OCB | X | 4 | 17.905 | 15.746 | 29.016 | 1.00 | 0.00 | H |
| ATOM | 137 | H5  | OCB | X | 4 | 16.670 | 17.555 | 24.658 | 1.00 | 0.00 | H |
| ATOM | 138 | H6  | OCB | X | 4 | 14.684 | 15.550 | 28.712 | 1.00 | 0.00 | H |
| ATOM | 139 | H7  | OCB | X | 4 | 13.514 | 18.993 | 25.841 | 1.00 | 0.00 | H |
| ATOM | 140 | H8  | OCB | X | 4 | 14.929 | 18.485 | 29.018 | 1.00 | 0.00 | H |
| ATOM | 141 | H9  | OCB | X | 4 | 22.761 | 19.082 | 26.242 | 1.00 | 0.00 | H |
| ATOM | 142 | H10 | OCB | X | 4 | 15.065 | 21.841 | 29.219 | 1.00 | 0.00 | H |
| ATOM | 143 | H11 | OCB | X | 4 | 21.393 | 22.290 | 29.125 | 1.00 | 0.00 | H |
| ATOM | 144 | H12 | OCB | X | 4 | 18.218 | 21.954 | 29.330 | 1.00 | 0.00 | H |
| ATOM | 145 | H13 | OCB | X | 4 | 19.664 | 20.393 | 24.891 | 1.00 | 0.00 | H |
| ATOM | 146 | H14 | OCB | X | 4 | 16.564 | 20.464 | 24.655 | 1.00 | 0.00 | H |

|      |     |     |     |   |   |        |        |        |      |      |   |
|------|-----|-----|-----|---|---|--------|--------|--------|------|------|---|
| ATOM | 147 | H15 | OCB | X | 4 | 17.943 | 23.660 | 26.122 | 1.00 | 0.00 | H |
| ATOM | 148 | H16 | OCB | X | 4 | 21.128 | 19.094 | 29.319 | 1.00 | 0.00 | H |
| ATOM | 149 | H17 | OCB | X | 4 | 14.275 | 20.201 | 23.815 | 1.00 | 0.00 | H |
| ATOM | 150 | H18 | OCB | X | 4 | 15.492 | 18.937 | 23.575 | 1.00 | 0.00 | H |
| ATOM | 151 | H19 | OCB | X | 4 | 13.947 | 17.219 | 23.124 | 1.00 | 0.00 | H |
| ATOM | 152 | H20 | OCB | X | 4 | 12.604 | 18.190 | 23.754 | 1.00 | 0.00 | H |
| ATOM | 153 | H21 | OCB | X | 4 | 18.313 | 16.544 | 23.690 | 1.00 | 0.00 | H |
| ATOM | 154 | H22 | OCB | X | 4 | 17.178 | 15.254 | 23.563 | 1.00 | 0.00 | H |
| ATOM | 155 | H23 | OCB | X | 4 | 20.099 | 14.743 | 23.530 | 1.00 | 0.00 | H |
| ATOM | 156 | H24 | OCB | X | 4 | 18.840 | 13.559 | 23.874 | 1.00 | 0.00 | H |
| ATOM | 157 | H25 | OCB | X | 4 | 22.670 | 18.122 | 24.281 | 1.00 | 0.00 | H |
| ATOM | 158 | H26 | OCB | X | 4 | 21.172 | 18.725 | 23.757 | 1.00 | 0.00 | H |
| ATOM | 159 | H27 | OCB | X | 4 | 22.071 | 21.007 | 23.543 | 1.00 | 0.00 | H |
| ATOM | 160 | H28 | OCB | X | 4 | 23.503 | 20.638 | 24.508 | 1.00 | 0.00 | H |
| ATOM | 161 | H29 | OCB | X | 4 | 18.116 | 21.640 | 23.890 | 1.00 | 0.00 | H |
| ATOM | 162 | H30 | OCB | X | 4 | 17.074 | 22.937 | 23.932 | 1.00 | 0.00 | H |
| ATOM | 163 | H31 | OCB | X | 4 | 18.887 | 24.531 | 24.454 | 1.00 | 0.00 | H |
| ATOM | 164 | H32 | OCB | X | 4 | 20.161 | 23.276 | 24.045 | 1.00 | 0.00 | H |
| ATOM | 165 | H33 | OCB | X | 4 | 17.774 | 12.534 | 33.650 | 1.00 | 0.00 | H |
| ATOM | 166 | H34 | OCB | X | 4 | 15.764 | 13.500 | 29.912 | 1.00 | 0.00 | H |
| ATOM | 167 | H35 | OCB | X | 4 | 19.983 | 14.138 | 30.421 | 1.00 | 0.00 | H |
| ATOM | 168 | H36 | OCB | X | 4 | 23.820 | 18.840 | 34.287 | 1.00 | 0.00 | H |
| ATOM | 169 | H37 | OCB | X | 4 | 22.708 | 21.303 | 30.877 | 1.00 | 0.00 | H |
| ATOM | 170 | H38 | OCB | X | 4 | 23.059 | 16.969 | 30.619 | 1.00 | 0.00 | H |
| ATOM | 171 | H39 | OCB | X | 4 | 17.375 | 24.608 | 34.119 | 1.00 | 0.00 | H |
| ATOM | 172 | H40 | OCB | X | 4 | 15.783 | 23.595 | 30.294 | 1.00 | 0.00 | H |
| ATOM | 173 | H41 | OCB | X | 4 | 20.007 | 23.971 | 30.760 | 1.00 | 0.00 | H |
| ATOM | 174 | H42 | OCB | X | 4 | 11.186 | 18.420 | 33.467 | 1.00 | 0.00 | H |
| ATOM | 175 | H43 | OCB | X | 4 | 12.938 | 20.689 | 30.233 | 1.00 | 0.00 | H |
| ATOM | 176 | H44 | OCB | X | 4 | 13.103 | 16.514 | 30.152 | 1.00 | 0.00 | H |
| ATOM | 177 | H45 | OCB | X | 4 | 24.811 | 23.205 | 32.047 | 1.00 | 0.00 | H |
| ATOM | 178 | H46 | OCB | X | 4 | 21.501 | 25.949 | 32.085 | 1.00 | 0.00 | H |
| ATOM | 179 | H47 | OCB | X | 4 | 25.019 | 15.023 | 31.266 | 1.00 | 0.00 | H |
| ATOM | 180 | H48 | OCB | X | 4 | 21.747 | 12.223 | 30.951 | 1.00 | 0.00 | H |
| ATOM | 181 | H49 | OCB | X | 4 | 10.543 | 22.507 | 30.952 | 1.00 | 0.00 | H |
| ATOM | 182 | H50 | OCB | X | 4 | 13.889 | 25.176 | 30.643 | 1.00 | 0.00 | H |
| ATOM | 183 | H51 | OCB | X | 4 | 10.789 | 14.592 | 30.773 | 1.00 | 0.00 | H |
| ATOM | 184 | H52 | OCB | X | 4 | 13.745 | 11.526 | 30.700 | 1.00 | 0.00 | H |
| ATOM | 185 | H53 | OCB | X | 4 | 14.590 | 14.332 | 34.539 | 1.00 | 0.00 | H |
| ATOM | 186 | H54 | OCB | X | 4 | 15.479 | 15.234 | 33.300 | 1.00 | 0.00 | H |
| ATOM | 187 | H55 | OCB | X | 4 | 13.902 | 15.870 | 33.987 | 1.00 | 0.00 | H |
| ATOM | 188 | H56 | OCB | X | 4 | 21.895 | 15.348 | 34.985 | 1.00 | 0.00 | H |
| ATOM | 189 | H57 | OCB | X | 4 | 21.477 | 16.696 | 33.959 | 1.00 | 0.00 | H |
| ATOM | 190 | H58 | OCB | X | 4 | 20.353 | 15.300 | 34.203 | 1.00 | 0.00 | H |
| ATOM | 191 | H59 | OCB | X | 4 | 19.967 | 22.285 | 34.734 | 1.00 | 0.00 | H |
| ATOM | 192 | H60 | OCB | X | 4 | 20.651 | 21.049 | 33.709 | 1.00 | 0.00 | H |
| ATOM | 193 | H61 | OCB | X | 4 | 21.598 | 21.511 | 35.103 | 1.00 | 0.00 | H |
| ATOM | 194 | H62 | OCB | X | 4 | 13.350 | 21.047 | 34.569 | 1.00 | 0.00 | H |
| ATOM | 195 | H63 | OCB | X | 4 | 14.895 | 21.741 | 34.260 | 1.00 | 0.00 | H |
| ATOM | 196 | H64 | OCB | X | 4 | 13.696 | 22.715 | 34.979 | 1.00 | 0.00 | H |
| ATOM | 197 | C1  | MOL | X | 5 | 15.764 | 19.550 | 31.959 | 1.00 | 0.00 | C |
| ATOM | 198 | C2  | MOL | X | 5 | 15.931 | 18.200 | 32.701 | 1.00 | 0.00 | C |
| ATOM | 199 | C3  | MOL | X | 5 | 17.090 | 20.350 | 32.006 | 1.00 | 0.00 | C |
| ATOM | 200 | C4  | MOL | X | 5 | 17.560 | 20.510 | 33.482 | 1.00 | 0.00 | C |
| ATOM | 201 | C5  | MOL | X | 5 | 16.371 | 18.425 | 34.145 | 1.00 | 0.00 | C |
| ATOM | 202 | C6  | MOL | X | 5 | 17.753 | 19.187 | 34.285 | 1.00 | 0.00 | C |
| ATOM | 203 | C7  | MOL | X | 5 | 18.793 | 18.284 | 33.416 | 1.00 | 0.00 | C |
| ATOM | 204 | C8  | MOL | X | 5 | 16.998 | 17.385 | 31.936 | 1.00 | 0.00 | C |
| ATOM | 205 | C9  | MOL | X | 5 | 18.131 | 19.571 | 31.268 | 1.00 | 0.00 | C |
| ATOM | 206 | C10 | MOL | X | 5 | 18.348 | 18.165 | 31.975 | 1.00 | 0.00 | C |

|      |     |     |     |   |   |        |        |        |      |      |    |
|------|-----|-----|-----|---|---|--------|--------|--------|------|------|----|
| ATOM | 207 | C11 | MOL | X | 5 | 18.151 | 19.288 | 35.719 | 1.00 | 0.00 | C  |
| ATOM | 208 | O1  | MOL | X | 5 | 18.973 | 18.568 | 36.215 | 1.00 | 0.00 | O  |
| ATOM | 209 | O2  | MOL | X | 5 | 17.512 | 19.958 | 36.528 | 1.00 | 0.00 | O  |
| ATOM | 210 | Br1 | MOL | X | 5 | 19.840 | 20.574 | 31.044 | 1.00 | 0.00 | BR |
| ATOM | 211 | H1  | MOL | X | 5 | 15.086 | 20.242 | 32.463 | 1.00 | 0.00 | H  |
| ATOM | 212 | H2  | MOL | X | 5 | 15.399 | 19.422 | 30.937 | 1.00 | 0.00 | H  |
| ATOM | 213 | H3  | MOL | X | 5 | 14.962 | 17.697 | 32.697 | 1.00 | 0.00 | H  |
| ATOM | 214 | H4  | MOL | X | 5 | 16.952 | 21.287 | 31.463 | 1.00 | 0.00 | H  |
| ATOM | 215 | H5  | MOL | X | 5 | 16.833 | 21.198 | 33.919 | 1.00 | 0.00 | H  |
| ATOM | 216 | H6  | MOL | X | 5 | 18.473 | 21.104 | 33.403 | 1.00 | 0.00 | H  |
| ATOM | 217 | H7  | MOL | X | 5 | 16.528 | 17.491 | 34.687 | 1.00 | 0.00 | H  |
| ATOM | 218 | H8  | MOL | X | 5 | 15.566 | 18.955 | 34.658 | 1.00 | 0.00 | H  |
| ATOM | 219 | H9  | MOL | X | 5 | 19.792 | 18.720 | 33.357 | 1.00 | 0.00 | H  |
| ATOM | 220 | H10 | MOL | X | 5 | 18.960 | 17.335 | 33.931 | 1.00 | 0.00 | H  |
| ATOM | 221 | H11 | MOL | X | 5 | 16.810 | 17.190 | 30.878 | 1.00 | 0.00 | H  |
| ATOM | 222 | H12 | MOL | X | 5 | 17.215 | 16.407 | 32.371 | 1.00 | 0.00 | H  |
| ATOM | 223 | H13 | MOL | X | 5 | 17.730 | 19.465 | 30.257 | 1.00 | 0.00 | H  |
| ATOM | 224 | H14 | MOL | X | 5 | 18.984 | 17.499 | 31.389 | 1.00 | 0.00 | H  |
| END  |     |     |     |   |   |        |        |        |      |      |    |

### OAMe-G5

|      |    |     |     |   |   |        |        |        |      |      |   |
|------|----|-----|-----|---|---|--------|--------|--------|------|------|---|
| ATOM | 1  | C1  | OCB | X | 4 | 22.134 | 24.202 | 29.705 | 1.00 | 0.00 | C |
| ATOM | 2  | C2  | OCB | X | 4 | 24.311 | 22.658 | 30.609 | 1.00 | 0.00 | C |
| ATOM | 3  | C3  | OCB | X | 4 | 22.630 | 23.086 | 28.994 | 1.00 | 0.00 | C |
| ATOM | 4  | C4  | OCB | X | 4 | 22.828 | 24.535 | 30.819 | 1.00 | 0.00 | C |
| ATOM | 5  | C5  | OCB | X | 4 | 24.016 | 23.864 | 31.229 | 1.00 | 0.00 | C |
| ATOM | 6  | C6  | OCB | X | 4 | 23.663 | 22.274 | 29.446 | 1.00 | 0.00 | C |
| ATOM | 7  | O1  | OCB | X | 4 | 25.313 | 21.815 | 31.154 | 1.00 | 0.00 | O |
| ATOM | 8  | C7  | OCB | X | 4 | 23.933 | 20.935 | 28.848 | 1.00 | 0.00 | C |
| ATOM | 9  | C8  | OCB | X | 4 | 24.986 | 20.653 | 31.869 | 1.00 | 0.00 | C |
| ATOM | 10 | O2  | OCB | X | 4 | 25.004 | 19.473 | 31.168 | 1.00 | 0.00 | O |
| ATOM | 11 | C9  | OCB | X | 4 | 23.893 | 19.016 | 30.524 | 1.00 | 0.00 | C |
| ATOM | 12 | C10 | OCB | X | 4 | 23.243 | 19.725 | 29.494 | 1.00 | 0.00 | C |
| ATOM | 13 | C11 | OCB | X | 4 | 22.004 | 19.336 | 28.992 | 1.00 | 0.00 | C |
| ATOM | 14 | C12 | OCB | X | 4 | 23.299 | 17.880 | 31.095 | 1.00 | 0.00 | C |
| ATOM | 15 | C13 | OCB | X | 4 | 21.384 | 18.174 | 29.492 | 1.00 | 0.00 | C |
| ATOM | 16 | C14 | OCB | X | 4 | 22.071 | 17.481 | 30.598 | 1.00 | 0.00 | C |
| ATOM | 17 | O3  | OCB | X | 4 | 21.352 | 16.608 | 31.272 | 1.00 | 0.00 | O |
| ATOM | 18 | C15 | OCB | X | 4 | 19.995 | 17.757 | 28.940 | 1.00 | 0.00 | C |
| ATOM | 19 | C16 | OCB | X | 4 | 18.933 | 18.561 | 29.673 | 1.00 | 0.00 | C |
| ATOM | 20 | C17 | OCB | X | 4 | 18.529 | 18.111 | 30.915 | 1.00 | 0.00 | C |
| ATOM | 21 | C18 | OCB | X | 4 | 20.349 | 17.056 | 32.192 | 1.00 | 0.00 | C |
| ATOM | 22 | O4  | OCB | X | 4 | 19.093 | 16.953 | 31.474 | 1.00 | 0.00 | O |
| ATOM | 23 | O5  | OCB | X | 4 | 22.446 | 25.579 | 31.615 | 1.00 | 0.00 | O |
| ATOM | 24 | C19 | OCB | X | 4 | 20.934 | 24.996 | 29.283 | 1.00 | 0.00 | C |
| ATOM | 25 | C20 | OCB | X | 4 | 19.660 | 24.486 | 29.951 | 1.00 | 0.00 | C |
| ATOM | 26 | O6  | OCB | X | 4 | 19.994 | 26.006 | 31.744 | 1.00 | 0.00 | O |
| ATOM | 27 | C21 | OCB | X | 4 | 19.173 | 25.072 | 31.148 | 1.00 | 0.00 | C |
| ATOM | 28 | C22 | OCB | X | 4 | 17.464 | 18.715 | 31.595 | 1.00 | 0.00 | C |
| ATOM | 29 | C23 | OCB | X | 4 | 16.956 | 19.875 | 31.065 | 1.00 | 0.00 | C |
| ATOM | 30 | C24 | OCB | X | 4 | 18.051 | 24.609 | 31.780 | 1.00 | 0.00 | C |
| ATOM | 31 | C25 | OCB | X | 4 | 17.441 | 23.496 | 31.340 | 1.00 | 0.00 | C |
| ATOM | 32 | O7  | OCB | X | 4 | 16.191 | 20.592 | 31.926 | 1.00 | 0.00 | O |
| ATOM | 33 | O8  | OCB | X | 4 | 16.504 | 23.001 | 32.120 | 1.00 | 0.00 | O |
| ATOM | 34 | C26 | OCB | X | 4 | 16.837 | 21.688 | 32.686 | 1.00 | 0.00 | C |
| ATOM | 35 | C27 | OCB | X | 4 | 18.995 | 23.328 | 29.475 | 1.00 | 0.00 | C |
| ATOM | 36 | C28 | OCB | X | 4 | 17.800 | 22.910 | 30.096 | 1.00 | 0.00 | C |

|      |    |     |     |   |   |        |        |        |      |      |   |
|------|----|-----|-----|---|---|--------|--------|--------|------|------|---|
| ATOM | 37 | C29 | OCB | X | 4 | 18.345 | 19.699 | 29.133 | 1.00 | 0.00 | C |
| ATOM | 38 | C30 | OCB | X | 4 | 16.938 | 21.808 | 29.459 | 1.00 | 0.00 | C |
| ATOM | 39 | C31 | OCB | X | 4 | 17.347 | 20.385 | 29.856 | 1.00 | 0.00 | C |
| ATOM | 40 | C32 | OCB | X | 4 | 21.222 | 25.436 | 32.406 | 1.00 | 0.00 | C |
| ATOM | 41 | C33 | OCB | X | 4 | 19.939 | 17.739 | 27.357 | 1.00 | 0.00 | C |
| ATOM | 42 | C34 | OCB | X | 4 | 19.202 | 16.510 | 26.834 | 1.00 | 0.00 | C |
| ATOM | 43 | C35 | OCB | X | 4 | 18.981 | 16.630 | 25.357 | 1.00 | 0.00 | C |
| ATOM | 44 | O9  | OCB | X | 4 | 19.925 | 16.798 | 24.644 | 1.00 | 0.00 | O |
| ATOM | 45 | C36 | OCB | X | 4 | 23.993 | 20.939 | 27.237 | 1.00 | 0.00 | C |
| ATOM | 46 | C37 | OCB | X | 4 | 24.862 | 22.024 | 26.591 | 1.00 | 0.00 | C |
| ATOM | 47 | C38 | OCB | X | 4 | 25.039 | 21.902 | 25.084 | 1.00 | 0.00 | C |
| ATOM | 48 | O10 | OCB | X | 4 | 25.922 | 21.137 | 24.664 | 1.00 | 0.00 | O |
| ATOM | 49 | C39 | OCB | X | 4 | 20.745 | 25.238 | 27.780 | 1.00 | 0.00 | C |
| ATOM | 50 | C40 | OCB | X | 4 | 21.994 | 25.635 | 26.988 | 1.00 | 0.00 | C |
| ATOM | 51 | C41 | OCB | X | 4 | 21.546 | 26.049 | 25.568 | 1.00 | 0.00 | C |
| ATOM | 52 | O11 | OCB | X | 4 | 21.315 | 27.250 | 25.433 | 1.00 | 0.00 | O |
| ATOM | 53 | C42 | OCB | X | 4 | 16.645 | 22.057 | 27.966 | 1.00 | 0.00 | C |
| ATOM | 54 | C43 | OCB | X | 4 | 15.648 | 21.107 | 27.359 | 1.00 | 0.00 | C |
| ATOM | 55 | C44 | OCB | X | 4 | 15.312 | 21.778 | 26.041 | 1.00 | 0.00 | C |
| ATOM | 56 | O12 | OCB | X | 4 | 14.542 | 22.721 | 26.026 | 1.00 | 0.00 | O |
| ATOM | 57 | C45 | OCB | X | 4 | 25.641 | 20.511 | 33.253 | 1.00 | 0.00 | C |
| ATOM | 58 | C46 | OCB | X | 4 | 26.797 | 20.400 | 35.821 | 1.00 | 0.00 | C |
| ATOM | 59 | C47 | OCB | X | 4 | 25.672 | 19.292 | 33.975 | 1.00 | 0.00 | C |
| ATOM | 60 | C48 | OCB | X | 4 | 26.137 | 21.610 | 33.799 | 1.00 | 0.00 | C |
| ATOM | 61 | C49 | OCB | X | 4 | 26.707 | 21.587 | 35.100 | 1.00 | 0.00 | C |
| ATOM | 62 | C50 | OCB | X | 4 | 26.231 | 19.224 | 35.267 | 1.00 | 0.00 | C |
| ATOM | 63 | C51 | OCB | X | 4 | 21.488 | 26.096 | 33.803 | 1.00 | 0.00 | C |
| ATOM | 64 | C52 | OCB | X | 4 | 21.874 | 26.958 | 36.433 | 1.00 | 0.00 | C |
| ATOM | 65 | C53 | OCB | X | 4 | 20.321 | 26.406 | 34.613 | 1.00 | 0.00 | C |
| ATOM | 66 | C54 | OCB | X | 4 | 22.761 | 26.053 | 34.353 | 1.00 | 0.00 | C |
| ATOM | 67 | C55 | OCB | X | 4 | 22.967 | 26.502 | 35.642 | 1.00 | 0.00 | C |
| ATOM | 68 | C56 | OCB | X | 4 | 20.597 | 26.821 | 35.944 | 1.00 | 0.00 | C |
| ATOM | 69 | C57 | OCB | X | 4 | 16.346 | 21.722 | 34.153 | 1.00 | 0.00 | C |
| ATOM | 70 | C58 | OCB | X | 4 | 15.389 | 21.705 | 36.831 | 1.00 | 0.00 | C |
| ATOM | 71 | C59 | OCB | X | 4 | 16.027 | 20.497 | 34.807 | 1.00 | 0.00 | C |
| ATOM | 72 | C60 | OCB | X | 4 | 16.335 | 22.879 | 34.909 | 1.00 | 0.00 | C |
| ATOM | 73 | C61 | OCB | X | 4 | 15.864 | 22.895 | 36.244 | 1.00 | 0.00 | C |
| ATOM | 74 | C62 | OCB | X | 4 | 15.473 | 20.516 | 36.083 | 1.00 | 0.00 | C |
| ATOM | 75 | C63 | OCB | X | 4 | 20.413 | 16.409 | 33.560 | 1.00 | 0.00 | C |
| ATOM | 76 | C64 | OCB | X | 4 | 20.417 | 15.280 | 36.093 | 1.00 | 0.00 | C |
| ATOM | 77 | C65 | OCB | X | 4 | 19.247 | 16.466 | 34.373 | 1.00 | 0.00 | C |
| ATOM | 78 | C66 | OCB | X | 4 | 21.592 | 15.845 | 34.097 | 1.00 | 0.00 | C |
| ATOM | 79 | C67 | OCB | X | 4 | 21.624 | 15.428 | 35.377 | 1.00 | 0.00 | C |
| ATOM | 80 | C68 | OCB | X | 4 | 19.271 | 15.884 | 35.664 | 1.00 | 0.00 | C |
| ATOM | 81 | O13 | OCB | X | 4 | 24.238 | 26.571 | 36.143 | 1.00 | 0.00 | O |
| ATOM | 82 | O14 | OCB | X | 4 | 15.839 | 24.029 | 36.975 | 1.00 | 0.00 | O |
| ATOM | 83 | O15 | OCB | X | 4 | 15.031 | 19.340 | 36.619 | 1.00 | 0.00 | O |
| ATOM | 84 | O16 | OCB | X | 4 | 27.314 | 22.721 | 35.562 | 1.00 | 0.00 | O |
| ATOM | 85 | O17 | OCB | X | 4 | 26.495 | 17.997 | 35.821 | 1.00 | 0.00 | O |
| ATOM | 86 | O18 | OCB | X | 4 | 18.210 | 15.765 | 36.469 | 1.00 | 0.00 | O |
| ATOM | 87 | O19 | OCB | X | 4 | 22.771 | 15.008 | 36.017 | 1.00 | 0.00 | O |
| ATOM | 88 | C69 | OCB | X | 4 | 16.516 | 25.150 | 36.571 | 1.00 | 0.00 | C |
| ATOM | 89 | C70 | OCB | X | 4 | 17.564 | 27.552 | 35.876 | 1.00 | 0.00 | C |
| ATOM | 90 | C71 | OCB | X | 4 | 17.781 | 25.452 | 36.964 | 1.00 | 0.00 | C |
| ATOM | 91 | C72 | OCB | X | 4 | 15.692 | 26.060 | 35.816 | 1.00 | 0.00 | C |
| ATOM | 92 | C73 | OCB | X | 4 | 16.229 | 27.286 | 35.491 | 1.00 | 0.00 | C |
| ATOM | 93 | C74 | OCB | X | 4 | 18.324 | 26.650 | 36.571 | 1.00 | 0.00 | C |
| ATOM | 94 | O20 | OCB | X | 4 | 19.588 | 27.067 | 36.812 | 1.00 | 0.00 | O |
| ATOM | 95 | C75 | OCB | X | 4 | 26.849 | 24.079 | 35.295 | 1.00 | 0.00 | C |
| ATOM | 96 | C76 | OCB | X | 4 | 26.184 | 26.832 | 34.973 | 1.00 | 0.00 | C |



|      |     |     |     |   |   |        |        |        |      |      |   |
|------|-----|-----|-----|---|---|--------|--------|--------|------|------|---|
| ATOM | 97  | C77 | OCB | X | 4 | 27.643 | 24.970 | 34.566 | 1.00 | 0.00 | C |
| ATOM | 98  | C78 | OCB | X | 4 | 25.712 | 24.653 | 35.953 | 1.00 | 0.00 | C |
| ATOM | 99  | C79 | OCB | X | 4 | 25.379 | 25.996 | 35.726 | 1.00 | 0.00 | C |
| ATOM | 100 | C80 | OCB | X | 4 | 27.325 | 26.306 | 34.331 | 1.00 | 0.00 | C |
| ATOM | 101 | C81 | OCB | X | 4 | 15.399 | 18.067 | 36.251 | 1.00 | 0.00 | C |
| ATOM | 102 | C82 | OCB | X | 4 | 15.982 | 15.353 | 36.006 | 1.00 | 0.00 | C |
| ATOM | 103 | C83 | OCB | X | 4 | 14.385 | 17.129 | 35.922 | 1.00 | 0.00 | C |
| ATOM | 104 | C84 | OCB | X | 4 | 16.703 | 17.623 | 36.481 | 1.00 | 0.00 | C |
| ATOM | 105 | C85 | OCB | X | 4 | 16.956 | 16.245 | 36.357 | 1.00 | 0.00 | C |
| ATOM | 106 | C86 | OCB | X | 4 | 14.690 | 15.790 | 35.708 | 1.00 | 0.00 | C |
| ATOM | 107 | C87 | OCB | X | 4 | 13.667 | 14.746 | 35.357 | 1.00 | 0.00 | C |
| ATOM | 108 | O21 | OCB | X | 4 | 13.828 | 13.605 | 35.696 | 1.00 | 0.00 | O |
| ATOM | 109 | C88 | OCB | X | 4 | 26.882 | 13.652 | 33.494 | 1.00 | 0.00 | C |
| ATOM | 110 | O22 | OCB | X | 4 | 28.014 | 13.947 | 33.075 | 1.00 | 0.00 | O |
| ATOM | 111 | C89 | OCB | X | 4 | 28.186 | 27.246 | 33.438 | 1.00 | 0.00 | C |
| ATOM | 112 | O23 | OCB | X | 4 | 29.098 | 26.758 | 32.769 | 1.00 | 0.00 | O |
| ATOM | 113 | O24 | OCB | X | 4 | 17.811 | 16.389 | 24.896 | 1.00 | 0.00 | O |
| ATOM | 114 | O25 | OCB | X | 4 | 15.656 | 21.269 | 24.926 | 1.00 | 0.00 | O |
| ATOM | 115 | O26 | OCB | X | 4 | 21.164 | 25.268 | 24.708 | 1.00 | 0.00 | O |
| ATOM | 116 | C90 | OCB | X | 4 | 15.301 | 28.352 | 34.832 | 1.00 | 0.00 | C |
| ATOM | 117 | O27 | OCB | X | 4 | 15.770 | 29.462 | 34.553 | 1.00 | 0.00 | O |
| ATOM | 118 | O28 | OCB | X | 4 | 26.351 | 12.653 | 33.093 | 1.00 | 0.00 | O |
| ATOM | 119 | O29 | OCB | X | 4 | 12.733 | 15.028 | 34.667 | 1.00 | 0.00 | O |
| ATOM | 120 | O30 | OCB | X | 4 | 14.101 | 28.217 | 34.876 | 1.00 | 0.00 | O |
| ATOM | 121 | O31 | OCB | X | 4 | 27.946 | 28.417 | 33.477 | 1.00 | 0.00 | O |
| ATOM | 122 | O32 | OCB | X | 4 | 24.243 | 22.490 | 24.379 | 1.00 | 0.00 | O |
| ATOM | 123 | C91 | OCB | X | 4 | 25.908 | 16.780 | 35.460 | 1.00 | 0.00 | C |
| ATOM | 124 | C92 | OCB | X | 4 | 24.778 | 14.271 | 34.820 | 1.00 | 0.00 | C |
| ATOM | 125 | C93 | OCB | X | 4 | 24.668 | 16.429 | 35.941 | 1.00 | 0.00 | C |
| ATOM | 126 | C94 | OCB | X | 4 | 26.564 | 15.890 | 34.604 | 1.00 | 0.00 | C |
| ATOM | 127 | C95 | OCB | X | 4 | 26.094 | 14.625 | 34.320 | 1.00 | 0.00 | C |
| ATOM | 128 | C96 | OCB | X | 4 | 24.096 | 15.186 | 35.645 | 1.00 | 0.00 | C |
| ATOM | 129 | C97 | OCB | X | 4 | 23.838 | 17.431 | 36.877 | 1.00 | 0.00 | C |
| ATOM | 130 | C98 | OCB | X | 4 | 24.770 | 23.689 | 36.683 | 1.00 | 0.00 | C |
| ATOM | 131 | C99 | OCB | X | 4 | 18.694 | 24.496 | 37.830 | 1.00 | 0.00 | C |
| ATOM | 132 | C   | OCB | X | 4 | 17.803 | 18.510 | 36.954 | 1.00 | 0.00 | C |
| ATOM | 133 | H1  | OCB | X | 4 | 22.055 | 22.805 | 28.115 | 1.00 | 0.00 | H |
| ATOM | 134 | H2  | OCB | X | 4 | 24.486 | 24.151 | 32.166 | 1.00 | 0.00 | H |
| ATOM | 135 | H3  | OCB | X | 4 | 24.990 | 20.809 | 29.091 | 1.00 | 0.00 | H |
| ATOM | 136 | H4  | OCB | X | 4 | 23.947 | 20.916 | 32.117 | 1.00 | 0.00 | H |
| ATOM | 137 | H5  | OCB | X | 4 | 21.615 | 19.808 | 28.093 | 1.00 | 0.00 | H |
| ATOM | 138 | H6  | OCB | X | 4 | 23.873 | 17.462 | 31.917 | 1.00 | 0.00 | H |
| ATOM | 139 | H7  | OCB | X | 4 | 19.750 | 16.720 | 29.177 | 1.00 | 0.00 | H |
| ATOM | 140 | H8  | OCB | X | 4 | 20.451 | 18.147 | 32.293 | 1.00 | 0.00 | H |
| ATOM | 141 | H9  | OCB | X | 4 | 21.037 | 26.027 | 29.628 | 1.00 | 0.00 | H |
| ATOM | 142 | H10 | OCB | X | 4 | 17.075 | 18.394 | 32.558 | 1.00 | 0.00 | H |
| ATOM | 143 | H11 | OCB | X | 4 | 17.686 | 25.119 | 32.667 | 1.00 | 0.00 | H |
| ATOM | 144 | H12 | OCB | X | 4 | 17.923 | 21.539 | 32.779 | 1.00 | 0.00 | H |
| ATOM | 145 | H13 | OCB | X | 4 | 19.336 | 22.677 | 28.674 | 1.00 | 0.00 | H |
| ATOM | 146 | H14 | OCB | X | 4 | 18.696 | 20.041 | 28.163 | 1.00 | 0.00 | H |
| ATOM | 147 | H15 | OCB | X | 4 | 15.961 | 21.988 | 29.912 | 1.00 | 0.00 | H |
| ATOM | 148 | H16 | OCB | X | 4 | 21.062 | 24.369 | 32.619 | 1.00 | 0.00 | H |
| ATOM | 149 | H17 | OCB | X | 4 | 19.469 | 18.632 | 26.940 | 1.00 | 0.00 | H |
| ATOM | 150 | H18 | OCB | X | 4 | 20.894 | 17.785 | 26.828 | 1.00 | 0.00 | H |
| ATOM | 151 | H19 | OCB | X | 4 | 19.834 | 15.654 | 27.077 | 1.00 | 0.00 | H |
| ATOM | 152 | H20 | OCB | X | 4 | 18.264 | 16.289 | 27.348 | 1.00 | 0.00 | H |
| ATOM | 153 | H21 | OCB | X | 4 | 22.969 | 21.141 | 26.914 | 1.00 | 0.00 | H |
| ATOM | 154 | H22 | OCB | X | 4 | 24.269 | 19.941 | 26.892 | 1.00 | 0.00 | H |
| ATOM | 155 | H23 | OCB | X | 4 | 24.456 | 22.981 | 26.927 | 1.00 | 0.00 | H |
| ATOM | 156 | H24 | OCB | X | 4 | 25.902 | 22.006 | 26.925 | 1.00 | 0.00 | H |

|      |     |     |     |   |   |        |        |        |      |      |   |
|------|-----|-----|-----|---|---|--------|--------|--------|------|------|---|
| ATOM | 157 | H25 | OCB | X | 4 | 20.304 | 24.324 | 27.379 | 1.00 | 0.00 | H |
| ATOM | 158 | H26 | OCB | X | 4 | 20.084 | 26.100 | 27.662 | 1.00 | 0.00 | H |
| ATOM | 159 | H27 | OCB | X | 4 | 22.514 | 26.464 | 27.473 | 1.00 | 0.00 | H |
| ATOM | 160 | H28 | OCB | X | 4 | 22.691 | 24.795 | 26.943 | 1.00 | 0.00 | H |
| ATOM | 161 | H29 | OCB | X | 4 | 16.331 | 23.094 | 27.827 | 1.00 | 0.00 | H |
| ATOM | 162 | H30 | OCB | X | 4 | 17.535 | 22.016 | 27.335 | 1.00 | 0.00 | H |
| ATOM | 163 | H31 | OCB | X | 4 | 15.955 | 20.067 | 27.228 | 1.00 | 0.00 | H |
| ATOM | 164 | H32 | OCB | X | 4 | 14.761 | 21.101 | 27.996 | 1.00 | 0.00 | H |
| ATOM | 165 | H33 | OCB | X | 4 | 27.413 | 20.402 | 36.718 | 1.00 | 0.00 | H |
| ATOM | 166 | H34 | OCB | X | 4 | 25.325 | 18.341 | 33.577 | 1.00 | 0.00 | H |
| ATOM | 167 | H35 | OCB | X | 4 | 26.068 | 22.567 | 33.290 | 1.00 | 0.00 | H |
| ATOM | 168 | H36 | OCB | X | 4 | 22.107 | 27.231 | 37.459 | 1.00 | 0.00 | H |
| ATOM | 169 | H37 | OCB | X | 4 | 19.318 | 26.257 | 34.221 | 1.00 | 0.00 | H |
| ATOM | 170 | H38 | OCB | X | 4 | 23.651 | 25.766 | 33.799 | 1.00 | 0.00 | H |
| ATOM | 171 | H39 | OCB | X | 4 | 14.838 | 21.795 | 37.764 | 1.00 | 0.00 | H |
| ATOM | 172 | H40 | OCB | X | 4 | 16.174 | 19.590 | 34.226 | 1.00 | 0.00 | H |
| ATOM | 173 | H41 | OCB | X | 4 | 16.630 | 23.818 | 34.449 | 1.00 | 0.00 | H |
| ATOM | 174 | H42 | OCB | X | 4 | 20.392 | 14.909 | 37.114 | 1.00 | 0.00 | H |
| ATOM | 175 | H43 | OCB | X | 4 | 18.333 | 17.004 | 34.133 | 1.00 | 0.00 | H |
| ATOM | 176 | H44 | OCB | X | 4 | 22.492 | 15.745 | 33.496 | 1.00 | 0.00 | H |
| ATOM | 177 | H45 | OCB | X | 4 | 17.985 | 28.490 | 35.524 | 1.00 | 0.00 | H |
| ATOM | 178 | H46 | OCB | X | 4 | 14.655 | 25.801 | 35.621 | 1.00 | 0.00 | H |
| ATOM | 179 | H47 | OCB | X | 4 | 25.754 | 27.772 | 34.637 | 1.00 | 0.00 | H |
| ATOM | 180 | H48 | OCB | X | 4 | 28.608 | 24.674 | 34.163 | 1.00 | 0.00 | H |
| ATOM | 181 | H49 | OCB | X | 4 | 16.092 | 14.272 | 36.014 | 1.00 | 0.00 | H |
| ATOM | 182 | H50 | OCB | X | 4 | 13.382 | 17.516 | 35.760 | 1.00 | 0.00 | H |
| ATOM | 183 | H51 | OCB | X | 4 | 24.272 | 13.380 | 34.457 | 1.00 | 0.00 | H |
| ATOM | 184 | H52 | OCB | X | 4 | 27.572 | 16.147 | 34.288 | 1.00 | 0.00 | H |
| ATOM | 185 | H53 | OCB | X | 4 | 22.813 | 17.423 | 36.500 | 1.00 | 0.00 | H |
| ATOM | 186 | H54 | OCB | X | 4 | 24.004 | 16.922 | 37.829 | 1.00 | 0.00 | H |
| ATOM | 187 | H55 | OCB | X | 4 | 24.249 | 18.434 | 37.010 | 1.00 | 0.00 | H |
| ATOM | 188 | H56 | OCB | X | 4 | 24.082 | 23.234 | 35.967 | 1.00 | 0.00 | H |
| ATOM | 189 | H57 | OCB | X | 4 | 25.294 | 22.893 | 37.217 | 1.00 | 0.00 | H |
| ATOM | 190 | H58 | OCB | X | 4 | 24.142 | 24.291 | 37.342 | 1.00 | 0.00 | H |
| ATOM | 191 | H59 | OCB | X | 4 | 18.431 | 23.438 | 37.757 | 1.00 | 0.00 | H |
| ATOM | 192 | H60 | OCB | X | 4 | 19.742 | 24.575 | 37.533 | 1.00 | 0.00 | H |
| ATOM | 193 | H61 | OCB | X | 4 | 18.657 | 24.782 | 38.883 | 1.00 | 0.00 | H |
| ATOM | 194 | H62 | OCB | X | 4 | 17.502 | 19.370 | 37.557 | 1.00 | 0.00 | H |
| ATOM | 195 | H63 | OCB | X | 4 | 18.529 | 17.927 | 37.523 | 1.00 | 0.00 | H |
| ATOM | 196 | H64 | OCB | X | 4 | 18.272 | 18.868 | 36.035 | 1.00 | 0.00 | H |
| ATOM | 197 | C1  | MOL | X | 5 | 20.542 | 21.530 | 32.908 | 1.00 | 0.00 | C |
| ATOM | 198 | C2  | MOL | X | 5 | 19.898 | 22.331 | 33.880 | 1.00 | 0.00 | C |
| ATOM | 199 | C3  | MOL | X | 5 | 20.061 | 22.074 | 35.222 | 1.00 | 0.00 | C |
| ATOM | 200 | C4  | MOL | X | 5 | 20.850 | 20.985 | 35.634 | 1.00 | 0.00 | C |
| ATOM | 201 | C5  | MOL | X | 5 | 21.524 | 20.267 | 34.671 | 1.00 | 0.00 | C |
| ATOM | 202 | C6  | MOL | X | 5 | 21.397 | 20.531 | 33.267 | 1.00 | 0.00 | C |
| ATOM | 203 | C7  | MOL | X | 5 | 21.019 | 20.605 | 37.120 | 1.00 | 0.00 | C |
| ATOM | 204 | C8  | MOL | X | 5 | 21.987 | 21.637 | 37.767 | 1.00 | 0.00 | C |
| ATOM | 205 | N1  | MOL | X | 5 | 22.348 | 21.391 | 39.236 | 1.00 | 0.00 | N |
| ATOM | 206 | C9  | MOL | X | 5 | 23.171 | 22.546 | 39.829 | 1.00 | 0.00 | C |
| ATOM | 207 | C10 | MOL | X | 5 | 23.207 | 20.124 | 39.335 | 1.00 | 0.00 | C |
| ATOM | 208 | C11 | MOL | X | 5 | 21.098 | 21.053 | 40.042 | 1.00 | 0.00 | C |
| ATOM | 209 | H1  | MOL | X | 5 | 22.558 | 23.448 | 39.819 | 1.00 | 0.00 | H |
| ATOM | 210 | H2  | MOL | X | 5 | 24.059 | 22.763 | 39.235 | 1.00 | 0.00 | H |
| ATOM | 211 | H3  | MOL | X | 5 | 23.432 | 22.313 | 40.863 | 1.00 | 0.00 | H |
| ATOM | 212 | H4  | MOL | X | 5 | 23.987 | 20.042 | 38.577 | 1.00 | 0.00 | H |
| ATOM | 213 | H5  | MOL | X | 5 | 22.674 | 19.193 | 39.137 | 1.00 | 0.00 | H |
| ATOM | 214 | H6  | MOL | X | 5 | 23.669 | 20.124 | 40.323 | 1.00 | 0.00 | H |
| ATOM | 215 | H7  | MOL | X | 5 | 20.419 | 21.903 | 39.960 | 1.00 | 0.00 | H |
| ATOM | 216 | H8  | MOL | X | 5 | 21.346 | 20.847 | 41.085 | 1.00 | 0.00 | H |

|      |     |     |     |   |   |        |        |        |      |      |   |
|------|-----|-----|-----|---|---|--------|--------|--------|------|------|---|
| ATOM | 217 | H9  | MOL | X | 5 | 20.685 | 20.154 | 39.582 | 1.00 | 0.00 | H |
| ATOM | 218 | H10 | MOL | X | 5 | 20.537 | 21.762 | 31.847 | 1.00 | 0.00 | H |
| ATOM | 219 | H11 | MOL | X | 5 | 19.221 | 23.142 | 33.623 | 1.00 | 0.00 | H |
| ATOM | 220 | H12 | MOL | X | 5 | 19.603 | 22.708 | 35.977 | 1.00 | 0.00 | H |
| ATOM | 221 | H13 | MOL | X | 5 | 22.234 | 19.480 | 34.912 | 1.00 | 0.00 | H |
| ATOM | 222 | H14 | MOL | X | 5 | 22.029 | 19.952 | 32.599 | 1.00 | 0.00 | H |
| ATOM | 223 | H15 | MOL | X | 5 | 20.014 | 20.629 | 37.547 | 1.00 | 0.00 | H |
| ATOM | 224 | H16 | MOL | X | 5 | 21.321 | 19.558 | 37.198 | 1.00 | 0.00 | H |
| ATOM | 225 | H17 | MOL | X | 5 | 22.873 | 21.654 | 37.131 | 1.00 | 0.00 | H |
| ATOM | 226 | H18 | MOL | X | 5 | 21.421 | 22.565 | 37.863 | 1.00 | 0.00 | H |
| END  |     |     |     |   |   |        |        |        |      |      |   |

## OAMe-G6

|      |    |     |     |   |   |        |        |        |      |      |   |
|------|----|-----|-----|---|---|--------|--------|--------|------|------|---|
| ATOM | 1  | C1  | OCB | X | 4 | 21.698 | 23.929 | 29.364 | 1.00 | 0.00 | C |
| ATOM | 2  | C2  | OCB | X | 4 | 23.942 | 22.554 | 30.387 | 1.00 | 0.00 | C |
| ATOM | 3  | C3  | OCB | X | 4 | 22.278 | 22.887 | 28.686 | 1.00 | 0.00 | C |
| ATOM | 4  | C4  | OCB | X | 4 | 22.305 | 24.303 | 30.565 | 1.00 | 0.00 | C |
| ATOM | 5  | C5  | OCB | X | 4 | 23.414 | 23.641 | 31.085 | 1.00 | 0.00 | C |
| ATOM | 6  | C6  | OCB | X | 4 | 23.324 | 22.155 | 29.175 | 1.00 | 0.00 | C |
| ATOM | 7  | O1  | OCB | X | 4 | 25.071 | 21.942 | 30.868 | 1.00 | 0.00 | O |
| ATOM | 8  | C7  | OCB | X | 4 | 23.906 | 20.991 | 28.378 | 1.00 | 0.00 | C |
| ATOM | 9  | C8  | OCB | X | 4 | 24.885 | 20.621 | 31.519 | 1.00 | 0.00 | C |
| ATOM | 10 | O2  | OCB | X | 4 | 25.106 | 19.580 | 30.601 | 1.00 | 0.00 | O |
| ATOM | 11 | C9  | OCB | X | 4 | 24.031 | 19.045 | 29.964 | 1.00 | 0.00 | C |
| ATOM | 12 | C10 | OCB | X | 4 | 23.358 | 19.711 | 28.950 | 1.00 | 0.00 | C |
| ATOM | 13 | C11 | OCB | X | 4 | 22.162 | 19.148 | 28.389 | 1.00 | 0.00 | C |
| ATOM | 14 | C12 | OCB | X | 4 | 23.412 | 17.986 | 30.599 | 1.00 | 0.00 | C |
| ATOM | 15 | C13 | OCB | X | 4 | 21.604 | 18.039 | 29.031 | 1.00 | 0.00 | C |
| ATOM | 16 | C14 | OCB | X | 4 | 22.236 | 17.466 | 30.195 | 1.00 | 0.00 | C |
| ATOM | 17 | O3  | OCB | X | 4 | 21.643 | 16.424 | 30.886 | 1.00 | 0.00 | O |
| ATOM | 18 | C15 | OCB | X | 4 | 20.315 | 17.546 | 28.498 | 1.00 | 0.00 | C |
| ATOM | 19 | C16 | OCB | X | 4 | 19.233 | 18.228 | 29.305 | 1.00 | 0.00 | C |
| ATOM | 20 | C17 | OCB | X | 4 | 18.671 | 17.617 | 30.438 | 1.00 | 0.00 | C |
| ATOM | 21 | C18 | OCB | X | 4 | 20.535 | 16.796 | 31.818 | 1.00 | 0.00 | C |
| ATOM | 22 | O4  | OCB | X | 4 | 19.273 | 16.547 | 31.074 | 1.00 | 0.00 | O |
| ATOM | 23 | O5  | OCB | X | 4 | 21.977 | 25.447 | 31.286 | 1.00 | 0.00 | O |
| ATOM | 24 | C19 | OCB | X | 4 | 20.530 | 24.833 | 28.811 | 1.00 | 0.00 | C |
| ATOM | 25 | C20 | OCB | X | 4 | 19.275 | 24.276 | 29.450 | 1.00 | 0.00 | C |
| ATOM | 26 | O6  | OCB | X | 4 | 19.654 | 25.625 | 31.486 | 1.00 | 0.00 | O |
| ATOM | 27 | C21 | OCB | X | 4 | 18.979 | 24.693 | 30.768 | 1.00 | 0.00 | C |
| ATOM | 28 | C22 | OCB | X | 4 | 17.703 | 18.283 | 31.248 | 1.00 | 0.00 | C |
| ATOM | 29 | C23 | OCB | X | 4 | 17.143 | 19.447 | 30.855 | 1.00 | 0.00 | C |
| ATOM | 30 | C24 | OCB | X | 4 | 17.872 | 24.119 | 31.487 | 1.00 | 0.00 | C |
| ATOM | 31 | C25 | OCB | X | 4 | 17.228 | 23.026 | 30.921 | 1.00 | 0.00 | C |
| ATOM | 32 | O7  | OCB | X | 4 | 16.290 | 20.068 | 31.750 | 1.00 | 0.00 | O |
| ATOM | 33 | O8  | OCB | X | 4 | 16.344 | 22.406 | 31.828 | 1.00 | 0.00 | O |
| ATOM | 34 | C26 | OCB | X | 4 | 16.827 | 21.174 | 32.445 | 1.00 | 0.00 | C |
| ATOM | 35 | C27 | OCB | X | 4 | 18.627 | 23.117 | 28.962 | 1.00 | 0.00 | C |
| ATOM | 36 | C28 | OCB | X | 4 | 17.541 | 22.494 | 29.660 | 1.00 | 0.00 | C |
| ATOM | 37 | C29 | OCB | X | 4 | 18.636 | 19.413 | 28.870 | 1.00 | 0.00 | C |
| ATOM | 38 | C30 | OCB | X | 4 | 16.828 | 21.259 | 29.144 | 1.00 | 0.00 | C |
| ATOM | 39 | C31 | OCB | X | 4 | 17.549 | 19.982 | 29.638 | 1.00 | 0.00 | C |
| ATOM | 40 | C32 | OCB | X | 4 | 20.840 | 25.205 | 32.094 | 1.00 | 0.00 | C |
| ATOM | 41 | C33 | OCB | X | 4 | 20.286 | 17.540 | 26.924 | 1.00 | 0.00 | C |
| ATOM | 42 | C34 | OCB | X | 4 | 19.144 | 16.724 | 26.379 | 1.00 | 0.00 | C |
| ATOM | 43 | C35 | OCB | X | 4 | 19.255 | 16.565 | 24.897 | 1.00 | 0.00 | C |
| ATOM | 44 | O9  | OCB | X | 4 | 20.251 | 16.079 | 24.391 | 1.00 | 0.00 | O |

|      |     |     |     |   |   |        |        |        |      |      |   |
|------|-----|-----|-----|---|---|--------|--------|--------|------|------|---|
| ATOM | 45  | C36 | OCB | X | 4 | 23.789 | 21.053 | 26.794 | 1.00 | 0.00 | C |
| ATOM | 46  | C37 | OCB | X | 4 | 24.780 | 22.052 | 26.300 | 1.00 | 0.00 | C |
| ATOM | 47  | C38 | OCB | X | 4 | 24.903 | 22.039 | 24.792 | 1.00 | 0.00 | C |
| ATOM | 48  | O10 | OCB | X | 4 | 24.139 | 22.710 | 24.120 | 1.00 | 0.00 | O |
| ATOM | 49  | C39 | OCB | X | 4 | 20.539 | 24.903 | 27.279 | 1.00 | 0.00 | C |
| ATOM | 50  | C40 | OCB | X | 4 | 19.526 | 26.010 | 26.793 | 1.00 | 0.00 | C |
| ATOM | 51  | C41 | OCB | X | 4 | 20.015 | 26.692 | 25.524 | 1.00 | 0.00 | C |
| ATOM | 52  | O11 | OCB | X | 4 | 19.498 | 26.533 | 24.464 | 1.00 | 0.00 | O |
| ATOM | 53  | C42 | OCB | X | 4 | 16.478 | 21.543 | 27.677 | 1.00 | 0.00 | C |
| ATOM | 54  | C43 | OCB | X | 4 | 15.769 | 20.314 | 26.998 | 1.00 | 0.00 | C |
| ATOM | 55  | C44 | OCB | X | 4 | 15.133 | 20.760 | 25.714 | 1.00 | 0.00 | C |
| ATOM | 56  | O12 | OCB | X | 4 | 14.194 | 21.565 | 25.636 | 1.00 | 0.00 | O |
| ATOM | 57  | C45 | OCB | X | 4 | 25.772 | 20.484 | 32.766 | 1.00 | 0.00 | C |
| ATOM | 58  | C46 | OCB | X | 4 | 27.125 | 20.389 | 35.232 | 1.00 | 0.00 | C |
| ATOM | 59  | C47 | OCB | X | 4 | 26.096 | 19.267 | 33.338 | 1.00 | 0.00 | C |
| ATOM | 60  | C48 | OCB | X | 4 | 26.083 | 21.648 | 33.466 | 1.00 | 0.00 | C |
| ATOM | 61  | C49 | OCB | X | 4 | 26.706 | 21.594 | 34.719 | 1.00 | 0.00 | C |
| ATOM | 62  | C50 | OCB | X | 4 | 26.798 | 19.206 | 34.520 | 1.00 | 0.00 | C |
| ATOM | 63  | C51 | OCB | X | 4 | 20.964 | 25.838 | 33.490 | 1.00 | 0.00 | C |
| ATOM | 64  | C52 | OCB | X | 4 | 21.080 | 26.353 | 36.242 | 1.00 | 0.00 | C |
| ATOM | 65  | C53 | OCB | X | 4 | 19.804 | 26.156 | 34.219 | 1.00 | 0.00 | C |
| ATOM | 66  | C54 | OCB | X | 4 | 22.174 | 25.774 | 34.124 | 1.00 | 0.00 | C |
| ATOM | 67  | C55 | OCB | X | 4 | 22.213 | 26.039 | 35.468 | 1.00 | 0.00 | C |
| ATOM | 68  | C56 | OCB | X | 4 | 19.890 | 26.400 | 35.577 | 1.00 | 0.00 | C |
| ATOM | 69  | C57 | OCB | X | 4 | 16.380 | 21.105 | 33.930 | 1.00 | 0.00 | C |
| ATOM | 70  | C58 | OCB | X | 4 | 15.475 | 21.001 | 36.595 | 1.00 | 0.00 | C |
| ATOM | 71  | C59 | OCB | X | 4 | 16.360 | 19.897 | 34.632 | 1.00 | 0.00 | C |
| ATOM | 72  | C60 | OCB | X | 4 | 15.885 | 22.279 | 34.550 | 1.00 | 0.00 | C |
| ATOM | 73  | C61 | OCB | X | 4 | 15.463 | 22.195 | 35.883 | 1.00 | 0.00 | C |
| ATOM | 74  | C62 | OCB | X | 4 | 15.971 | 19.867 | 35.941 | 1.00 | 0.00 | C |
| ATOM | 75  | C63 | OCB | X | 4 | 20.752 | 16.035 | 33.118 | 1.00 | 0.00 | C |
| ATOM | 76  | C64 | OCB | X | 4 | 21.009 | 14.807 | 35.679 | 1.00 | 0.00 | C |
| ATOM | 77  | C65 | OCB | X | 4 | 19.648 | 15.603 | 33.829 | 1.00 | 0.00 | C |
| ATOM | 78  | C66 | OCB | X | 4 | 22.047 | 15.812 | 33.631 | 1.00 | 0.00 | C |
| ATOM | 79  | C67 | OCB | X | 4 | 22.095 | 15.233 | 34.927 | 1.00 | 0.00 | C |
| ATOM | 80  | C68 | OCB | X | 4 | 19.796 | 14.998 | 35.101 | 1.00 | 0.00 | C |
| ATOM | 81  | O13 | OCB | X | 4 | 23.350 | 25.960 | 36.190 | 1.00 | 0.00 | O |
| ATOM | 82  | O14 | OCB | X | 4 | 15.175 | 23.381 | 36.526 | 1.00 | 0.00 | O |
| ATOM | 83  | O15 | OCB | X | 4 | 16.059 | 18.710 | 36.671 | 1.00 | 0.00 | O |
| ATOM | 84  | O16 | OCB | X | 4 | 26.910 | 22.711 | 35.441 | 1.00 | 0.00 | O |
| ATOM | 85  | O17 | OCB | X | 4 | 27.109 | 18.009 | 35.061 | 1.00 | 0.00 | O |
| ATOM | 86  | O18 | OCB | X | 4 | 18.697 | 14.685 | 35.887 | 1.00 | 0.00 | O |
| ATOM | 87  | O19 | OCB | X | 4 | 23.300 | 15.161 | 35.630 | 1.00 | 0.00 | O |
| ATOM | 88  | C69 | OCB | X | 4 | 15.746 | 24.536 | 36.188 | 1.00 | 0.00 | C |
| ATOM | 89  | C70 | OCB | X | 4 | 16.573 | 27.115 | 35.512 | 1.00 | 0.00 | C |
| ATOM | 90  | C71 | OCB | X | 4 | 17.059 | 24.945 | 36.548 | 1.00 | 0.00 | C |
| ATOM | 91  | C72 | OCB | X | 4 | 14.853 | 25.425 | 35.675 | 1.00 | 0.00 | C |
| ATOM | 92  | C73 | OCB | X | 4 | 15.256 | 26.731 | 35.216 | 1.00 | 0.00 | C |
| ATOM | 93  | C74 | OCB | X | 4 | 17.473 | 26.236 | 36.169 | 1.00 | 0.00 | C |
| ATOM | 94  | O20 | OCB | X | 4 | 18.776 | 26.622 | 36.358 | 1.00 | 0.00 | O |
| ATOM | 95  | C75 | OCB | X | 4 | 26.339 | 23.971 | 35.348 | 1.00 | 0.00 | C |
| ATOM | 96  | C76 | OCB | X | 4 | 25.281 | 26.500 | 34.897 | 1.00 | 0.00 | C |
| ATOM | 97  | C77 | OCB | X | 4 | 27.048 | 24.905 | 34.603 | 1.00 | 0.00 | C |
| ATOM | 98  | C78 | OCB | X | 4 | 25.074 | 24.303 | 35.763 | 1.00 | 0.00 | C |
| ATOM | 99  | C79 | OCB | X | 4 | 24.583 | 25.595 | 35.616 | 1.00 | 0.00 | C |
| ATOM | 100 | C80 | OCB | X | 4 | 26.476 | 26.126 | 34.283 | 1.00 | 0.00 | C |
| ATOM | 101 | C81 | OCB | X | 4 | 16.323 | 17.428 | 36.255 | 1.00 | 0.00 | C |
| ATOM | 102 | C82 | OCB | X | 4 | 16.497 | 14.927 | 35.308 | 1.00 | 0.00 | C |
| ATOM | 103 | C83 | OCB | X | 4 | 15.199 | 16.875 | 35.504 | 1.00 | 0.00 | C |
| ATOM | 104 | C84 | OCB | X | 4 | 17.532 | 16.790 | 36.467 | 1.00 | 0.00 | C |

|      |     |     |     |   |   |        |        |        |      |      |   |
|------|-----|-----|-----|---|---|--------|--------|--------|------|------|---|
| ATOM | 105 | C85 | OCB | X | 4 | 17.586 | 15.468 | 36.026 | 1.00 | 0.00 | C |
| ATOM | 106 | C86 | OCB | X | 4 | 15.337 | 15.607 | 34.984 | 1.00 | 0.00 | C |
| ATOM | 107 | C87 | OCB | X | 4 | 14.178 | 14.934 | 34.253 | 1.00 | 0.00 | C |
| ATOM | 108 | O21 | OCB | X | 4 | 13.149 | 15.534 | 34.012 | 1.00 | 0.00 | O |
| ATOM | 109 | C88 | OCB | X | 4 | 26.693 | 13.805 | 32.238 | 1.00 | 0.00 | C |
| ATOM | 110 | O22 | OCB | X | 4 | 27.596 | 14.021 | 31.468 | 1.00 | 0.00 | O |
| ATOM | 111 | C89 | OCB | X | 4 | 27.346 | 27.143 | 33.560 | 1.00 | 0.00 | C |
| ATOM | 112 | O23 | OCB | X | 4 | 26.956 | 28.252 | 33.457 | 1.00 | 0.00 | O |
| ATOM | 113 | O24 | OCB | X | 4 | 18.482 | 17.131 | 24.162 | 1.00 | 0.00 | O |
| ATOM | 114 | O25 | OCB | X | 4 | 15.641 | 20.430 | 24.668 | 1.00 | 0.00 | O |
| ATOM | 115 | O26 | OCB | X | 4 | 20.932 | 27.462 | 25.534 | 1.00 | 0.00 | O |
| ATOM | 116 | C90 | OCB | X | 4 | 14.329 | 27.636 | 34.552 | 1.00 | 0.00 | C |
| ATOM | 117 | O27 | OCB | X | 4 | 13.246 | 27.213 | 34.215 | 1.00 | 0.00 | O |
| ATOM | 118 | O28 | OCB | X | 4 | 26.054 | 12.798 | 32.029 | 1.00 | 0.00 | O |
| ATOM | 119 | O29 | OCB | X | 4 | 14.298 | 13.774 | 33.891 | 1.00 | 0.00 | O |
| ATOM | 120 | O30 | OCB | X | 4 | 14.634 | 28.719 | 34.240 | 1.00 | 0.00 | O |
| ATOM | 121 | O31 | OCB | X | 4 | 28.481 | 26.975 | 33.234 | 1.00 | 0.00 | O |
| ATOM | 122 | O32 | OCB | X | 4 | 25.610 | 21.241 | 24.172 | 1.00 | 0.00 | O |
| ATOM | 123 | C91 | OCB | X | 4 | 26.428 | 16.857 | 34.731 | 1.00 | 0.00 | C |
| ATOM | 124 | C92 | OCB | X | 4 | 25.040 | 14.560 | 34.083 | 1.00 | 0.00 | C |
| ATOM | 125 | C93 | OCB | X | 4 | 25.288 | 16.504 | 35.406 | 1.00 | 0.00 | C |
| ATOM | 126 | C94 | OCB | X | 4 | 26.908 | 16.041 | 33.661 | 1.00 | 0.00 | C |
| ATOM | 127 | C95 | OCB | X | 4 | 26.243 | 14.846 | 33.310 | 1.00 | 0.00 | C |
| ATOM | 128 | C96 | OCB | X | 4 | 24.501 | 15.421 | 34.988 | 1.00 | 0.00 | C |
| ATOM | 129 | C97 | OCB | X | 4 | 24.848 | 17.347 | 36.600 | 1.00 | 0.00 | C |
| ATOM | 130 | C98 | OCB | X | 4 | 24.371 | 23.266 | 36.608 | 1.00 | 0.00 | C |
| ATOM | 131 | C99 | OCB | X | 4 | 18.043 | 23.981 | 37.166 | 1.00 | 0.00 | C |
| ATOM | 132 | C   | OCB | X | 4 | 18.674 | 17.439 | 37.252 | 1.00 | 0.00 | C |
| ATOM | 133 | H1  | OCB | X | 4 | 21.878 | 22.597 | 27.718 | 1.00 | 0.00 | H |
| ATOM | 134 | H2  | OCB | X | 4 | 23.938 | 24.014 | 31.961 | 1.00 | 0.00 | H |
| ATOM | 135 | H3  | OCB | X | 4 | 24.976 | 20.948 | 28.590 | 1.00 | 0.00 | H |
| ATOM | 136 | H4  | OCB | X | 4 | 23.864 | 20.564 | 31.925 | 1.00 | 0.00 | H |
| ATOM | 137 | H5  | OCB | X | 4 | 21.717 | 19.570 | 27.492 | 1.00 | 0.00 | H |
| ATOM | 138 | H6  | OCB | X | 4 | 23.953 | 17.502 | 31.408 | 1.00 | 0.00 | H |
| ATOM | 139 | H7  | OCB | X | 4 | 20.259 | 16.510 | 28.839 | 1.00 | 0.00 | H |
| ATOM | 140 | H8  | OCB | X | 4 | 20.624 | 17.849 | 32.123 | 1.00 | 0.00 | H |
| ATOM | 141 | H9  | OCB | X | 4 | 20.769 | 25.834 | 29.176 | 1.00 | 0.00 | H |
| ATOM | 142 | H10 | OCB | X | 4 | 17.474 | 17.885 | 32.234 | 1.00 | 0.00 | H |
| ATOM | 143 | H11 | OCB | X | 4 | 17.737 | 24.411 | 32.526 | 1.00 | 0.00 | H |
| ATOM | 144 | H12 | OCB | X | 4 | 17.918 | 21.105 | 32.572 | 1.00 | 0.00 | H |
| ATOM | 145 | H13 | OCB | X | 4 | 18.921 | 22.690 | 28.007 | 1.00 | 0.00 | H |
| ATOM | 146 | H14 | OCB | X | 4 | 19.002 | 19.862 | 27.950 | 1.00 | 0.00 | H |
| ATOM | 147 | H15 | OCB | X | 4 | 15.857 | 21.357 | 29.635 | 1.00 | 0.00 | H |
| ATOM | 148 | H16 | OCB | X | 4 | 20.856 | 24.109 | 32.180 | 1.00 | 0.00 | H |
| ATOM | 149 | H17 | OCB | X | 4 | 20.265 | 18.547 | 26.502 | 1.00 | 0.00 | H |
| ATOM | 150 | H18 | OCB | X | 4 | 21.202 | 17.045 | 26.595 | 1.00 | 0.00 | H |
| ATOM | 151 | H19 | OCB | X | 4 | 19.165 | 15.730 | 26.832 | 1.00 | 0.00 | H |
| ATOM | 152 | H20 | OCB | X | 4 | 18.152 | 17.122 | 26.604 | 1.00 | 0.00 | H |
| ATOM | 153 | H21 | OCB | X | 4 | 22.809 | 21.402 | 26.460 | 1.00 | 0.00 | H |
| ATOM | 154 | H22 | OCB | X | 4 | 24.102 | 20.088 | 26.390 | 1.00 | 0.00 | H |
| ATOM | 155 | H23 | OCB | X | 4 | 24.418 | 23.005 | 26.692 | 1.00 | 0.00 | H |
| ATOM | 156 | H24 | OCB | X | 4 | 25.761 | 21.798 | 26.707 | 1.00 | 0.00 | H |
| ATOM | 157 | H25 | OCB | X | 4 | 21.555 | 25.109 | 26.935 | 1.00 | 0.00 | H |
| ATOM | 158 | H26 | OCB | X | 4 | 20.244 | 23.931 | 26.877 | 1.00 | 0.00 | H |
| ATOM | 159 | H27 | OCB | X | 4 | 18.564 | 25.517 | 26.636 | 1.00 | 0.00 | H |
| ATOM | 160 | H28 | OCB | X | 4 | 19.539 | 26.829 | 27.516 | 1.00 | 0.00 | H |
| ATOM | 161 | H29 | OCB | X | 4 | 15.824 | 22.416 | 27.723 | 1.00 | 0.00 | H |
| ATOM | 162 | H30 | OCB | X | 4 | 17.342 | 21.750 | 27.042 | 1.00 | 0.00 | H |
| ATOM | 163 | H31 | OCB | X | 4 | 16.433 | 19.471 | 26.795 | 1.00 | 0.00 | H |
| ATOM | 164 | H32 | OCB | X | 4 | 14.949 | 19.940 | 27.614 | 1.00 | 0.00 | H |

|      |     |     |     |   |   |        |        |        |      |      |   |
|------|-----|-----|-----|---|---|--------|--------|--------|------|------|---|
| ATOM | 165 | H33 | OCB | X | 4 | 27.634 | 20.435 | 36.191 | 1.00 | 0.00 | H |
| ATOM | 166 | H34 | OCB | X | 4 | 25.768 | 18.344 | 32.868 | 1.00 | 0.00 | H |
| ATOM | 167 | H35 | OCB | X | 4 | 25.701 | 22.604 | 33.116 | 1.00 | 0.00 | H |
| ATOM | 168 | H36 | OCB | X | 4 | 20.920 | 26.557 | 37.297 | 1.00 | 0.00 | H |
| ATOM | 169 | H37 | OCB | X | 4 | 18.818 | 26.167 | 33.762 | 1.00 | 0.00 | H |
| ATOM | 170 | H38 | OCB | X | 4 | 23.007 | 25.345 | 33.573 | 1.00 | 0.00 | H |
| ATOM | 171 | H39 | OCB | X | 4 | 15.286 | 20.992 | 37.665 | 1.00 | 0.00 | H |
| ATOM | 172 | H40 | OCB | X | 4 | 16.716 | 19.058 | 34.039 | 1.00 | 0.00 | H |
| ATOM | 173 | H41 | OCB | X | 4 | 15.766 | 23.251 | 34.077 | 1.00 | 0.00 | H |
| ATOM | 174 | H42 | OCB | X | 4 | 21.150 | 14.517 | 36.718 | 1.00 | 0.00 | H |
| ATOM | 175 | H43 | OCB | X | 4 | 18.640 | 15.819 | 33.484 | 1.00 | 0.00 | H |
| ATOM | 176 | H44 | OCB | X | 4 | 22.914 | 16.261 | 33.153 | 1.00 | 0.00 | H |
| ATOM | 177 | H45 | OCB | X | 4 | 16.881 | 28.127 | 35.263 | 1.00 | 0.00 | H |
| ATOM | 178 | H46 | OCB | X | 4 | 13.837 | 25.062 | 35.542 | 1.00 | 0.00 | H |
| ATOM | 179 | H47 | OCB | X | 4 | 24.959 | 27.537 | 34.949 | 1.00 | 0.00 | H |
| ATOM | 180 | H48 | OCB | X | 4 | 28.026 | 24.713 | 34.170 | 1.00 | 0.00 | H |
| ATOM | 181 | H49 | OCB | X | 4 | 16.706 | 13.900 | 35.019 | 1.00 | 0.00 | H |
| ATOM | 182 | H50 | OCB | X | 4 | 14.289 | 17.449 | 35.346 | 1.00 | 0.00 | H |
| ATOM | 183 | H51 | OCB | X | 4 | 24.588 | 13.573 | 34.031 | 1.00 | 0.00 | H |
| ATOM | 184 | H52 | OCB | X | 4 | 27.856 | 16.327 | 33.211 | 1.00 | 0.00 | H |
| ATOM | 185 | H53 | OCB | X | 4 | 24.055 | 16.990 | 37.261 | 1.00 | 0.00 | H |
| ATOM | 186 | H54 | OCB | X | 4 | 25.757 | 17.226 | 37.192 | 1.00 | 0.00 | H |
| ATOM | 187 | H55 | OCB | X | 4 | 24.763 | 18.374 | 36.238 | 1.00 | 0.00 | H |
| ATOM | 188 | H56 | OCB | X | 4 | 23.480 | 23.522 | 37.185 | 1.00 | 0.00 | H |
| ATOM | 189 | H57 | OCB | X | 4 | 24.107 | 22.481 | 35.895 | 1.00 | 0.00 | H |
| ATOM | 190 | H58 | OCB | X | 4 | 25.090 | 22.878 | 37.332 | 1.00 | 0.00 | H |
| ATOM | 191 | H59 | OCB | X | 4 | 18.078 | 23.058 | 36.583 | 1.00 | 0.00 | H |
| ATOM | 192 | H60 | OCB | X | 4 | 19.020 | 24.379 | 37.449 | 1.00 | 0.00 | H |
| ATOM | 193 | H61 | OCB | X | 4 | 17.595 | 23.709 | 38.124 | 1.00 | 0.00 | H |
| ATOM | 194 | H62 | OCB | X | 4 | 19.612 | 16.945 | 36.991 | 1.00 | 0.00 | H |
| ATOM | 195 | H63 | OCB | X | 4 | 18.764 | 18.489 | 36.964 | 1.00 | 0.00 | H |
| ATOM | 196 | H64 | OCB | X | 4 | 18.421 | 17.354 | 38.311 | 1.00 | 0.00 | H |
| ATOM | 197 | O1  | MOL | X | 5 | 19.531 | 22.558 | 34.023 | 1.00 | 0.00 | O |
| ATOM | 198 | O2  | MOL | X | 5 | 20.990 | 21.783 | 32.668 | 1.00 | 0.00 | O |
| ATOM | 199 | N1  | MOL | X | 5 | 20.331 | 21.687 | 33.681 | 1.00 | 0.00 | N |
| ATOM | 200 | C1  | MOL | X | 5 | 20.935 | 20.863 | 34.785 | 1.00 | 0.00 | C |
| ATOM | 201 | C2  | MOL | X | 5 | 20.660 | 21.134 | 36.163 | 1.00 | 0.00 | C |
| ATOM | 202 | C3  | MOL | X | 5 | 21.710 | 19.686 | 34.563 | 1.00 | 0.00 | C |
| ATOM | 203 | C4  | MOL | X | 5 | 21.142 | 20.244 | 37.218 | 1.00 | 0.00 | C |
| ATOM | 204 | C5  | MOL | X | 5 | 22.083 | 18.793 | 35.574 | 1.00 | 0.00 | C |
| ATOM | 205 | C6  | MOL | X | 5 | 21.773 | 19.042 | 36.880 | 1.00 | 0.00 | C |
| ATOM | 206 | C7  | MOL | X | 5 | 20.774 | 20.569 | 38.560 | 1.00 | 0.00 | C |
| ATOM | 207 | O3  | MOL | X | 5 | 20.158 | 21.591 | 38.798 | 1.00 | 0.00 | O |
| ATOM | 208 | O4  | MOL | X | 5 | 21.080 | 19.850 | 39.499 | 1.00 | 0.00 | O |
| ATOM | 209 | H1  | MOL | X | 5 | 20.122 | 21.993 | 36.554 | 1.00 | 0.00 | H |
| ATOM | 210 | H2  | MOL | X | 5 | 21.956 | 19.468 | 33.527 | 1.00 | 0.00 | H |
| ATOM | 211 | H3  | MOL | X | 5 | 22.560 | 17.848 | 35.329 | 1.00 | 0.00 | H |
| ATOM | 212 | H4  | MOL | X | 5 | 22.077 | 18.327 | 37.641 | 1.00 | 0.00 | H |
| END  |     |     |     |   |   |        |        |        |      |      |   |
